# Supplementary material for: Enhanced recombination empowers the detection and mapping of Quantitative Trait Loci
Source: Research Square preprint supplement (doi:10.21203/rs.3.rs-3837166/v1), 2024-01-09
Supplement: Supplementary file 1 [file 7b2ce53e7e0cabd2b8f3a897.xlsx]

## Sheet: Full Hybrid WT
Population	ID_Pot_Pheno	ID_Manip_Pheno	Line	Treatment	ID_Geno	Relative Expansion Rate RER18-31 [no unit]	Compactness 31DAS [no unit]	Hue 31DAS [no unit]	Bolting_time [DAS]
Full Hybrid WT	7	P3ID47	B54	0.6_23d	4055_F	0.188611412877287	0.607095432974879	77.0173197332823	50
Full Hybrid WT	8	P3ID47	A67	0.6_23d	4055_G	0.224055416891443	0.617230727341681	75.5230259882359	52
Full Hybrid WT	9	P3ID47	B31	0.6_23d	4055_H	0.219715566018175	0.648951629645007	77.1327984790416	56
Full Hybrid WT	10	P3ID47	A49	0.6_23d	4055_I	0.217444575567031	0.614875735141955	76.485848280917	49
Full Hybrid WT	11	P3ID47	A47	0.6_23d	4055_J	0.211007091966848	0.674319612780179	76.5807824173491	51
Full Hybrid WT	17	P3ID47	B54	0.6_23d	4055_P	0.224991770674603	0.609784856333768	76.2496832814916	49
Full Hybrid WT	18	P3ID47	A67	0.6_23d	4055_Q	0.190936529584518	0.768372684449325	74.0210211359118	49
Full Hybrid WT	19	P3ID47	B31	0.6_23d	4055_R	0.209647663428312	0.566242473046691	76.4002460223283	49
Full Hybrid WT	20	P3ID47	A49	0.6_23d	4055_S	0.222855071411915	0.721133218065103	76.7886165551278	50
Full Hybrid WT	21	P3ID47	A47	0.6_23d	4055_T	0.203383858449474	0.610249261345061	74.7717838668924	49
Full Hybrid WT	27	P3ID47	B54	0.6_23d	4055_Z	0.229205414180105	0.704509669344745	75.0592794676322	51
Full Hybrid WT	28	P3ID47	A67	0.6_23d	4055_AA	0.20874645016505	0.626308879118209	76.6838989432598	51
Full Hybrid WT	29	P3ID47	B31	0.6_23d	4055_AB	0.216598252181972	0.619967356832944	76.4692037329851	50
Full Hybrid WT	30	P3ID47	A49	0.6_23d	4055_AC	0.222488482244911	0.622284067080154	77.2773116115212	50
Full Hybrid WT	31	P3ID47	A47	0.6_23d	4055_AD	0.210930989468518	0.575790742731309	76.6538824592029	49
Full Hybrid WT	37	P3ID47	B54	0.6_23d	4055_AJ	0.218571812385167	0.599725015656831	75.9483223734648	49
Full Hybrid WT	38	P3ID47	A67	0.6_23d	4055_AK	0.226698085499128	0.575473156925499	75.897656516903	49
Full Hybrid WT	39	P3ID47	B31	0.6_23d	4055_AL	0.167329106934156	0.648917160676333	74.8762929697508	48
Full Hybrid WT	40	P3ID47	A49	0.6_23d	4055_AM	0.211297010680391	0.619486924541413	76.8677120339663	49
Full Hybrid WT	41	P3ID47	A47	0.6_23d	4055_AN	0.202531189740743	0.699199761533523	73.5252005736435	47
Full Hybrid WT	47	P3ID47	B54	0.6_23d	4055_AT	0.206520557991652	0.63377683817708	76.8993595021235	52
Full Hybrid WT	48	P3ID47	A67	0.6_23d	4055_AU	0.219667003261379	0.657905340192468	76.6229514648467	52
Full Hybrid WT	49	P3ID47	B31	0.6_23d	4055_AV	0.217303550076193	0.623253181552714	76.3787447312496	50
Full Hybrid WT	50	P3ID47	A49	0.6_23d	4055_AW	0.212937591215794	0.654589884943781	75.9297343658035	51
Full Hybrid WT	51	P3ID47	A47	0.6_23d	4055_AX	0.228834991969802	0.6023142227632	75.9975013415046	51
Full Hybrid WT	57	P3ID47	B54	0.6_23d	4055_BD	0.217010395093279	0.63115940823085	75.8862503090745	52
Full Hybrid WT	58	P3ID47	A67	0.6_23d	4055_BE	0.220556889363259	0.597316907176062	73.521724317225	52
Full Hybrid WT	59	P3ID47	B31	0.6_23d	4055_BF	0.185942017196232	0.659955887962057	74.0121885932463	46
Full Hybrid WT	60	P3ID47	A49	0.6_23d	4055_BG	0.214155444908396	0.601880091076845	76.1897486005067	50
Full Hybrid WT	61	P3ID47	A47	0.6_23d	4055_BH	0.198588870436862	0.701344265665964	72.987281820649	50
Full Hybrid WT	67	P3ID47	B54	0.6_23d	4055_BN	0.22483620523796	0.596071343586189	76.2384142530479	50
Full Hybrid WT	68	P3ID47	A67	0.6_23d	4055_BO	0.228515858828862	0.596763470073067	75.7095984203216	50
Full Hybrid WT	70	P3ID47	A49	0.6_23d	4055_BQ	0.201635573966622	0.659179106421257	76.7996530417309	51
Full Hybrid WT	71	P3ID47	A47	0.6_23d	4055_BR	0.208276872226314	0.513799720556764	77.2399334932914	51
Full Hybrid WT	77	P3ID47	B54	0.6_23d	4055_BX	0.225749011727329	0.607460996114572	75.6824063799283	50
Full Hybrid WT	78	P3ID47	A67	0.6_23d	4055_BY	0.227349796018337	0.534539060537553	76.1307121101201	51
Full Hybrid WT	79	P3ID47	B31	0.6_23d	4055_BZ	0.223075099130461	0.618739443740432	75.8993356867053	49
Full Hybrid WT	80	P3ID47	A49	0.6_23d	4055_CA	0.200564845945935	0.67111664215409	74.4485495958876	50
Full Hybrid WT	81	P3ID47	A47	0.6_23d	4055_CB	0.220354474302948	0.591549593491639	76.3278230967046	51
Full Hybrid WT	87	P3ID47	B54	0.6_23d	4055_CH	0.228977040404119	0.592440676099763	75.6267937432534	52
Full Hybrid WT	88	P3ID47	A67	0.6_23d	4055_CI	0.184469323712937	0.656885141659405	73.4240283020274	52
Full Hybrid WT	89	P3ID47	B31	0.6_23d	4055_CJ	0.184266283516404	0.740989858107081	75.8111073494841	49
Full Hybrid WT	90	P3ID47	A49	0.6_23d	4055_CK	0.222948587421924	0.616211521569634	75.8039867760417	50
Full Hybrid WT	91	P3ID47	A47	0.6_23d	4055_CL	0.216055011672953	0.582945005006547	76.9876299899098	51
Full Hybrid WT	97	P3ID47	B54	0.6_23d	4067_BJ	0.212713536804897	0.683881479145614	76.7492026077186	51
Full Hybrid WT	98	P3ID47	A67	0.6_23d	4056_A	0.22165376707251	0.58967999306218	73.1958752097786	50
Full Hybrid WT	99	P3ID47	B31	0.6_23d	4056_B	0.216049488785573	0.687670058462109	76.0396495615097	50
Full Hybrid WT	100	P3ID47	A49	0.6_23d	4056_C	0.223192997081272	0.618382263861406	76.6304637589939	50
Full Hybrid WT	107	P3ID47	B54	0.6_23d	4056_J	0.219304361449042	0.590242131267754	76.2468247529624	50
Full Hybrid WT	108	P3ID47	A67	0.6_23d	4056_K	0.232549731164477	0.625387273327917	76.0999753225559	49
Full Hybrid WT	109	P3ID47	B31	0.6_23d	4056_L	0.196047885628449	0.694678360021525	73.3959637592682	46
Full Hybrid WT	110	P3ID47	A49	0.6_23d	4056_M	0.213498370420557	0.648358490971164	76.3802764352821	50
Full Hybrid WT	111	P3ID47	A47	0.6_23d	4056_N	0.195765967372515	0.656878460216257	74.0222153229769	49
Full Hybrid WT	117	P3ID47	B54	0.6_23d	4056_T	0.219943622605067	0.584709136140168	76.6028635133036	50
Full Hybrid WT	118	P3ID47	A67	0.6_23d	4056_U	0.247394501455655	0.60490045941807	74.5995670418331	50
Full Hybrid WT	119	NA	NA	NA	4056_V	NA	NA	NA	NA
Full Hybrid WT	120	P3ID47	A49	0.6_23d	4056_W	0.222875822979882	0.53181920443053	77.1823356659509	50
Full Hybrid WT	121	P3ID47	A47	0.6_23d	4056_X	0.206842466921035	0.678196993062302	74.5727033369196	52
Full Hybrid WT	127	P3ID47	B54	0.6_23d	4056_AD	0.217950920557924	0.602962181127848	76.7966064581748	49
Full Hybrid WT	128	P3ID47	A67	0.6_23d	4056_AE	0.214243827336613	0.58793805285449	76.6075035200273	49
Full Hybrid WT	129	P3ID47	B31	0.6_23d	4056_AF	0.228180720971475	0.588539675077968	75.9838959280138	50
Full Hybrid WT	130	P3ID47	A49	0.6_23d	4056_AG	0.216941625170562	0.545278522277641	76.7495337307391	52
Full Hybrid WT	131	P3ID47	A47	0.6_23d	4056_AH	0.207350978301509	0.685665572866227	73.9863181144145	47
Full Hybrid WT	137	P3ID47	B54	0.6_23d	4056_AN	0.210244532446903	0.533828961911686	76.6474730912751	51
Full Hybrid WT	138	P3ID47	A67	0.6_23d	4056_AO	0.181823053112404	0.68702103474828	71.8039687164845	49
Full Hybrid WT	139	P3ID47	B31	0.6_23d	4056_AP	0.222965708456153	0.624259063709961	75.7665070916826	49
Full Hybrid WT	140	P3ID47	A49	0.6_23d	4056_AQ	0.222826277341921	0.604516255691761	76.460434093226	49
Full Hybrid WT	141	P3ID47	A47	0.6_23d	4056_AR	0.222653256428729	0.708741055021886	76.8069485389587	49
Full Hybrid WT	147	P3ID47	B54	0.6_23d	4056_AX	0.228863582098661	0.664389390360791	76.1764575035168	50
Full Hybrid WT	148	P3ID47	A67	0.6_23d	4056_AY	0.190097597602592	0.739396756815882	74.3380233342827	51
Full Hybrid WT	149	P3ID47	B31	0.6_23d	4056_AZ	0.225755154550201	0.574584574731378	76.5839806512841	50
Full Hybrid WT	150	P3ID47	A49	0.6_23d	4056_BA	0.20174028215494	0.582473548321774	76.5920443900109	50
Full Hybrid WT	151	P3ID47	A47	0.6_23d	4056_BB	0.227612908471301	0.642077668056669	76.6566061349483	50
Full Hybrid WT	157	P3ID47	B54	0.6_23d	4056_BH	0.215306174390899	0.583837347186267	76.0494386894504	49
Full Hybrid WT	158	P3ID47	A67	0.6_23d	4056_BI	0.216481361246038	0.670866460045816	75.1309831781992	52
Full Hybrid WT	159	P3ID47	B31	0.6_23d	4056_BJ	0.209893186329969	0.62814111795568	74.3876314019749	52
Full Hybrid WT	160	P3ID47	A49	0.6_23d	4056_BK	0.215666481987386	0.595926724507712	76.7584243449874	49
Full Hybrid WT	161	P3ID47	A47	0.6_23d	4056_BL	0.198793488883459	0.633350264506387	74.8326862200432	46
Full Hybrid WT	167	P3ID47	B54	0.6_23d	4056_BR	0.173304662690485	0.763327603511727	73.2148462646209	50
Full Hybrid WT	169	P3ID47	B31	0.6_23d	4056_BT	0.200225749375326	0.655180583342108	73.4912242553146	49
Full Hybrid WT	170	P3ID47	A49	0.6_23d	4056_BU	0.229725385636075	0.619402918015797	76.3919867138687	48
Full Hybrid WT	171	P3ID47	A47	0.6_23d	4056_BV	0.222362316704963	0.620010379971248	76.6010293889577	50
Full Hybrid WT	178	P3ID47	A67	0.6_23d	4056_CC	0.201073975024258	0.645176089922368	73.028030019209	47
Full Hybrid WT	180	P3ID47	A49	0.6_23d	4056_CE	0.228140523447387	0.621056192529097	76.8014397488488	49
Full Hybrid WT	187	P3ID47	B54	0.6_23d	4056_CL	0.204158511396054	0.6190358719253	76.8030732748116	50
Full Hybrid WT	188	P3ID47	A67	0.6_23d	4056_CM	0.222627546187364	0.561904869544579	76.1829389623292	50
Full Hybrid WT	189	P3ID47	B31	0.6_23d	4056_CN	0.208389688841673	0.672602573440155	75.3257611576517	47
Full Hybrid WT	190	P3ID47	A49	0.6_23d	4056_CO	0.21445319820579	0.542078125112053	77.0120699629897	49
Full Hybrid WT	197	P3ID47	B54	0.6_23d	4062_D	0.211868795230741	0.637928231125089	77.1060770915017	47
Full Hybrid WT	199	P3ID47	B31	0.6_23d	4062_F	0.226503497322217	0.570040971612526	76.7958077736356	50
Full Hybrid WT	200	P3ID47	A49	0.6_23d	4062_G	0.215326147916117	0.589252703006632	77.0405988190051	48
Full Hybrid WT	201	P3ID47	A47	0.6_23d	4062_H	0.227906390238144	0.646872024423045	76.3423367024725	50
Full Hybrid WT	207	P3ID47	B54	0.6_23d	4062_N	0.173466599440659	0.686338101283389	74.0266775085554	48
Full Hybrid WT	208	P3ID47	A67	0.6_23d	4062_O	0.23117511418376	0.63148628661211	76.0643646249997	50
Full Hybrid WT	209	P3ID47	B31	0.6_23d	4062_P	0.208682711142368	0.572801264322402	77.1977840805837	50
Full Hybrid WT	210	P3ID47	A49	0.6_23d	4062_Q	0.226555696653985	0.654962328944207	76.9992931226443	50
Full Hybrid WT	211	P3ID47	A47	0.6_23d	4062_R	0.193003282466051	0.740291825918027	75.6346017386641	50
Full Hybrid WT	217	P3ID47	B54	0.6_23d	4062_X	0.219444102372015	0.625296203552762	76.8941696042754	50
Full Hybrid WT	218	P3ID47	A67	0.6_23d	4062_Y	0.209686297758402	0.552414134042703	76.9451056323575	50
Full Hybrid WT	219	P3ID47	B31	0.6_23d	4062_Z	0.215750653952518	0.640521436197112	77.2736726740593	50
Full Hybrid WT	220	P3ID47	A49	0.6_23d	4062_AA	0.223043677069449	0.608066369416858	76.728521753002	46
Full Hybrid WT	227	P3ID47	B54	0.6_23d	4062_AH	0.208522673013658	0.65735879860945	76.188311890343	50
Full Hybrid WT	228	P3ID47	A67	0.6_23d	4062_AI	0.226667960693274	0.622301880461154	76.3616635745801	49
Full Hybrid WT	229	P3ID47	B31	0.6_23d	4062_AJ	0.203739501903334	0.686746939481593	74.3753546992899	46
Full Hybrid WT	230	P3ID47	A49	0.6_23d	4062_AK	0.19937767323449	0.699457365693647	73.4539179287696	46
Full Hybrid WT	231	P3ID47	A47	0.6_23d	4062_AL	0.215617877090044	0.701967321001839	76.7499875664349	50
Full Hybrid WT	237	P3ID47	B54	0.6_23d	4062_AR	0.209747815724984	0.681755577285708	77.1094226594374	49
Full Hybrid WT	238	P3ID47	A67	0.6_23d	4062_AS	0.22635747933629	0.617717976959486	76.2309486502686	49
Full Hybrid WT	239	P3ID47	B31	0.6_23d	4062_AT	0.193433221693205	0.682357025941174	74.1025474081971	49
Full Hybrid WT	240	P3ID47	A49	0.6_23d	4062_AU	0.215666829586369	0.632845754347422	77.2168507899159	50
Full Hybrid WT	241	P3ID47	A47	0.6_23d	4062_AV	0.200847163697243	0.758433953056373	75.1433463395874	50
Full Hybrid WT	247	P3ID47	B54	0.6_23d	4062_BB	0.224000323009091	0.615643075876148	76.3276334828068	49
Full Hybrid WT	248	P3ID47	A67	0.6_23d	4062_BC	0.225679212615968	0.628333546384442	76.4762754097716	49
Full Hybrid WT	250	P3ID47	A49	0.6_23d	4062_BE	0.178119369237361	0.666208472428013	76.6473645404356	50
Full Hybrid WT	251	P3ID47	A47	0.6_23d	4062_BF	0.22058671940035	0.550984741980834	76.6638466614616	47
Full Hybrid WT	257	P3ID47	B54	0.6_23d	4062_BL	0.212340959636324	0.69338937296537	74.107793397485	48
Full Hybrid WT	258	P3ID47	A67	0.6_23d	4062_BM	0.208258606765486	0.650684297946101	76.8351541569866	46
Full Hybrid WT	259	P3ID47	B31	0.6_23d	4062_BN	0.225435266786547	0.574443335740629	76.7427133578105	47
Full Hybrid WT	260	P3ID47	A49	0.6_23d	4062_BO	0.221623012050324	0.594903283944925	77.0157471346032	48
Full Hybrid WT	261	P3ID47	A47	0.6_23d	4062_BP	0.215955918224709	0.599867509207424	77.3571975137097	48
Full Hybrid WT	267	P3ID47	B54	0.6_23d	4062_BV	0.210596746794357	0.575861092042322	76.5025818406085	47
Full Hybrid WT	268	P3ID47	A67	0.6_23d	4062_BW	0.238856394922582	0.59305176297064	74.7010648361396	50
Full Hybrid WT	269	P3ID47	B31	0.6_23d	4062_BX	0.206648676486673	0.685117847875754	74.8613213385259	47
Full Hybrid WT	270	P3ID47	A49	0.6_23d	4062_BY	0.214086905371701	0.58380134748595	77.5307710643291	47
Full Hybrid WT	271	P3ID47	A47	0.6_23d	4062_BZ	0.205924538236513	0.666172748477479	74.8704865194836	49
Full Hybrid WT	277	P3ID47	B54	0.6_23d	4062_CF	0.209853978475937	0.711608917989682	76.3388340937089	48
Full Hybrid WT	279	P3ID47	B31	0.6_23d	4062_CH	0.203771054455413	0.661218555714969	74.2031299162738	48
Full Hybrid WT	280	P3ID47	A49	0.6_23d	4062_CI	0.215006668151744	0.677742110948525	76.4355677462163	49
Full Hybrid WT	281	P3ID47	A47	0.6_23d	4062_CJ	0.184257432915977	0.81867532307101	73.5123171277531	49
Full Hybrid WT	287	P3ID47	B54	0.6_23d	4062_CP	0.215331210283563	0.682500141752821	74.0613351454315	48
Full Hybrid WT	288	P3ID47	A67	0.6_23d	4062_CQ	0.221817240718135	0.597362466073711	77.4187815456695	50
Full Hybrid WT	289	P3ID47	B31	0.6_23d	4067_BL	0.209798828142697	0.668645576193107	76.8855809836587	50
Full Hybrid WT	290	P3ID47	A49	0.6_23d	4063_A	0.209272075125902	0.582992037287933	78.3436303256166	49
Full Hybrid WT	291	P3ID47	A47	0.6_23d	4063_B	0.216060840110008	0.66539661535127	77.2258964666039	50
Full Hybrid WT	297	P3ID47	B54	0.6_23d	4063_H	0.218978877430659	0.530123768431581	76.3311259552895	52
Full Hybrid WT	298	P3ID47	A67	0.6_23d	4063_I	0.178088028921483	0.755620271079419	73.5234535712354	49
Full Hybrid WT	299	P3ID47	B31	0.6_23d	4063_J	0.224683192970663	0.584774866356281	76.877041525968	46
Full Hybrid WT	301	P3ID47	A47	0.6_23d	4063_L	0.195439773636316	0.645306282976561	73.2773069660733	48
Full Hybrid WT	307	P3ID47	B54	0.6_23d	4063_R	0.209277101392095	0.539215725668731	77.4612346461788	49
Full Hybrid WT	309	P3ID47	B31	0.6_23d	4063_T	0.200557506316043	0.620160718378307	78.0003526248705	47
Full Hybrid WT	310	P3ID47	A49	0.6_23d	4063_U	0.219828487268955	0.605860045146727	76.6426241606208	48
Full Hybrid WT	311	P3ID47	A47	0.6_23d	4063_V	0.228351642068767	0.609603316866818	76.4846084938212	49
Full Hybrid WT	317	P3ID47	B54	0.6_23d	4063_AB	0.222481760373856	0.54045866742607	76.6794314232498	49
Full Hybrid WT	320	P3ID47	A49	0.6_23d	4063_AE	0.202172800028971	0.476776474743641	77.4114192529597	50
Full Hybrid WT	321	P3ID47	A47	0.6_23d	4063_AF	0.212108924892548	0.588166540758584	76.9091478966397	48
Full Hybrid WT	327	P3ID47	B54	0.6_23d	4063_AL	0.224874474339055	0.586633858749942	75.7290750943162	50
Full Hybrid WT	328	P3ID47	A67	0.6_23d	4063_AM	0.231564118633542	0.62066890270306	75.7042576767867	50
Full Hybrid WT	329	P3ID47	B31	0.6_23d	4063_AN	0.217919984921035	0.624369266902802	77.0911218902573	47
Full Hybrid WT	330	P3ID47	A49	0.6_23d	4063_AO	0.214743031966427	0.597499754516889	77.2157412946119	48
Full Hybrid WT	331	P3ID47	A47	0.6_23d	4063_AP	0.225824223738423	0.611318964941646	76.5286769955515	49
Full Hybrid WT	337	P3ID47	B54	0.6_23d	4063_AV	0.128277456546797	0.841871756236397	72.5874129786524	49
Full Hybrid WT	339	P3ID47	B31	0.6_23d	4063_AX	0.228315404435356	0.617666884718962	76.7686892116217	47
Full Hybrid WT	340	P3ID47	A49	0.6_23d	4063_AY	0.22005539842323	0.564534294833977	76.7568594835944	46
Full Hybrid WT	341	P3ID47	A47	0.6_23d	4063_AZ	0.22698908181647	0.685290734986688	77.0507676228996	50
Full Hybrid WT	347	P3ID47	B54	0.6_23d	4063_BF	0.208163676994923	0.535796206331744	78.0508852589014	49
Full Hybrid WT	348	P3ID47	A67	0.6_23d	4063_BG	0.229569359048316	0.733841217174914	75.305141497001	49
Full Hybrid WT	349	P3ID47	B31	0.6_23d	4063_BH	0.184488627678511	0.770045221108461	74.6733844969015	48
Full Hybrid WT	350	P3ID47	A49	0.6_23d	4063_BI	0.214402015498461	0.654279817158171	77.4007909343455	50
Full Hybrid WT	351	P3ID47	A47	0.6_23d	4063_BJ	0.223909954509723	0.607117754459514	76.9265276806387	50
Full Hybrid WT	357	P3ID47	B54	0.6_23d	4063_BP	0.226331419970004	0.597054725633668	75.9410059789541	50
Full Hybrid WT	358	P3ID47	A67	0.6_23d	4063_BQ	0.221354354572071	0.575973361853954	76.3828035471238	49
Full Hybrid WT	359	P3ID47	B31	0.6_23d	4063_BR	0.215223707736527	0.551372192177262	77.4516792518315	47
Full Hybrid WT	360	P3ID47	A49	0.6_23d	4063_BS	0.20782254447013	0.724273814400812	77.9561333225903	49
Full Hybrid WT	361	P3ID47	A47	0.6_23d	4063_BT	0.229377952320742	0.639186578909715	77.4256184135102	48
Full Hybrid WT	367	P3ID47	B54	0.6_23d	4063_BZ	0.215675936790012	0.670493014540766	76.9955106119227	50
Full Hybrid WT	368	P3ID47	A67	0.6_23d	4063_CA	0.205850952004702	0.548761787361507	77.6712218979254	50
Full Hybrid WT	369	P3ID47	B31	0.6_23d	4063_CB	0.186390517948207	0.652927799886299	73.7046337353613	49
Full Hybrid WT	371	P3ID47	A47	0.6_23d	4063_CD	0.217442221781402	0.690148589116136	77.2009892698603	50
Full Hybrid WT	377	P3ID47	B54	0.6_23d	4063_CJ	0.209031780150241	0.686189885854497	73.127209496053	48
Full Hybrid WT	379	P3ID47	B31	0.6_23d	4063_CL	0.179081281194856	0.64821306684515	73.054140677715	48
Full Hybrid WT	380	P3ID47	A49	0.6_23d	4063_CM	0.217714692349206	0.585632093940348	77.1483549399131	49
Full Hybrid WT	381	P3ID47	A47	0.6_23d	4063_CN	0.226462940205857	0.587358235889611	77.0024046851438	50
Full Hybrid WT	387	P3ID47	B54	0.6_23d	4064_B	0.219919804143989	0.575406852140327	76.0319706171489	49
Full Hybrid WT	389	P3ID47	B31	0.6_23d	4064_D	0.218056362248169	0.632681492804078	77.196752291058	49
Full Hybrid WT	390	P3ID47	A49	0.6_23d	4064_E	0.192655183511029	0.711302850875671	75.0472951989442	49
Full Hybrid WT	391	P3ID47	A47	0.6_23d	4064_F	0.218641664651695	0.596467563579269	76.8908314259988	49
Full Hybrid WT	397	P3ID47	B54	0.6_23d	4064_L	0.208297321852554	0.65153695061991	74.1928687572335	49
Full Hybrid WT	398	P3ID47	A67	0.6_23d	4064_M	0.191290500107108	0.659364203647661	74.3040350337487	49
Full Hybrid WT	399	P3ID47	B31	0.6_23d	4064_N	0.224104687403935	0.713289944245763	75.9642092588611	49
Full Hybrid WT	400	P3ID47	A49	0.6_23d	4064_O	0.213342945550559	0.59936588094024	77.4135699446097	48
Full Hybrid WT	401	P3ID47	A47	0.6_23d	4064_P	0.196877920231306	0.637738411209185	74.3608539420345	49
Full Hybrid WT	407	P3ID47	B54	0.6_23d	4064_V	0.201831866535679	0.672112270350567	74.6729903131402	49
Full Hybrid WT	408	P3ID47	A67	0.6_23d	4064_W	0.206813210467629	0.676155592683031	74.1597653382232	49
Full Hybrid WT	409	P3ID47	B31	0.6_23d	4064_X	0.217768151921079	0.540279547515844	77.4592183559061	52
Full Hybrid WT	410	P3ID47	A49	0.6_23d	4064_Y	0.198213866548852	0.640041570781679	74.6463549705667	48
Full Hybrid WT	411	P3ID47	A47	0.6_23d	4064_Z	0.215605274487699	0.605631340519751	77.6757269176379	49
Full Hybrid WT	417	P3ID47	B54	0.6_23d	4064_AF	0.212153663555012	0.618423501540249	77.118974484136	50
Full Hybrid WT	418	P3ID47	A67	0.6_23d	4064_AG	0.223580500300962	0.678201915537996	76.451816357811	49
Full Hybrid WT	419	P3ID47	B31	0.6_23d	4064_AH	0.198645708221319	0.689308505845055	77.5827857142483	48
Full Hybrid WT	420	P3ID47	A49	0.6_23d	4064_AI	0.214581513381951	0.623539187779565	77.1407675285287	47
Full Hybrid WT	421	P3ID47	A47	0.6_23d	4064_AJ	0.214511467627431	0.594484983245122	76.6677304152864	49
Full Hybrid WT	427	P3ID47	B54	0.6_23d	4064_AP	0.203710163922461	0.641624674772679	78.0653760768182	50
Full Hybrid WT	428	P3ID47	A67	0.6_23d	4064_AQ	0.230503136370897	0.569254945185891	76.3872259717817	50
Full Hybrid WT	429	P3ID47	B31	0.6_23d	4064_AR	0.209754751193695	0.54617847237076	76.9778535766922	49
Full Hybrid WT	430	P3ID47	A49	0.6_23d	4064_AS	0.192964575096203	0.656173880457186	75.2556240039672	46
Full Hybrid WT	431	P3ID47	A47	0.6_23d	4064_AT	0.213216881978206	0.610984521584721	76.7350720356576	51
Full Hybrid WT	437	P3ID47	B54	0.6_23d	4064_AZ	0.216351011826735	0.632289595524494	77.0904504979832	51
Full Hybrid WT	438	P3ID47	A67	0.6_23d	4064_BA	0.23460325294987	0.617155565524696	76.7358293072381	49
Full Hybrid WT	439	P3ID47	B31	0.6_23d	4064_BB	0.200003182511878	0.508315600373428	78.1087398295032	49
Full Hybrid WT	440	P3ID47	A49	0.6_23d	4064_BC	0.186329060553219	0.675274886185139	73.824612398172	46
Full Hybrid WT	448	P3ID47	A67	0.6_23d	4064_BK	0.215577039349062	0.640833587688156	77.0568985674495	49
Full Hybrid WT	450	P3ID47	A49	0.6_23d	4064_BM	0.203469431058007	0.554108061297232	77.8546622150436	47
Full Hybrid WT	451	P3ID47	A47	0.6_23d	4064_BN	0.216191908046428	0.538405285561506	77.8939346344211	49
Full Hybrid WT	458	P3ID47	A67	0.6_23d	4064_BU	0.217448362415132	0.71388501847701	77.0373691271853	48
Full Hybrid WT	459	P3ID47	B31	0.6_23d	4064_BV	0.202274912890326	0.647370308806004	74.4177181083304	47
Full Hybrid WT	460	P3ID47	A49	0.6_23d	4064_BW	0.221819382787975	0.593358858484103	77.3403378588356	47
Full Hybrid WT	461	P3ID47	A47	0.6_23d	4064_BX	0.226998145556224	0.655405998940861	77.0829801258215	48
Full Hybrid WT	467	P3ID47	B54	0.6_23d	4064_CD	0.2175569548546	0.592046421325887	77.0003890939992	47
Full Hybrid WT	468	P3ID47	A67	0.6_23d	4064_CE	0.214745631832143	0.601033691554869	77.5048179455079	49
Full Hybrid WT	469	P3ID47	B31	0.6_23d	4064_CF	0.221159495040588	0.586876806688467	76.5581468586379	48
Full Hybrid WT	470	P3ID47	A49	0.6_23d	4064_CG	0.216774256848813	0.674838057167626	77.1320170573241	50
Full Hybrid WT	471	P3ID47	A47	0.6_23d	4064_CH	0.222929658685309	0.599322725796725	76.8279676255686	51
Full Hybrid WT	477	P3ID47	B54	0.6_23d	4064_CN	0.211322910213429	0.63863779786506	77.8865845009704	49
Full Hybrid WT	479	P3ID47	B31	0.6_23d	4064_CP	0.221109274269336	0.576033357811484	77.1389610104482	48
Full Hybrid WT	480	P3ID47	A49	0.6_23d	4064_CQ	0.217783880737344	0.61544948219298	77.8424669210517	48
Full Hybrid WT	481	P3ID47	A47	0.6_23d	4067_BN	0.190746864260561	0.582684824902724	76.5282782230979	51
Full Hybrid WT	488	P3ID47	A67	0.6_23d	4065_G	0.204771689037132	0.694335689565322	74.1451627692797	48
Full Hybrid WT	489	P3ID47	B31	0.6_23d	4065_H	0.206959665200252	0.637516786057283	77.6956672298384	50
Full Hybrid WT	490	P3ID47	A49	0.6_23d	4065_I	0.203384888933037	0.618032904126542	75.2453148134745	46
Full Hybrid WT	491	P3ID47	A47	0.6_23d	4065_J	0.216762847482688	0.571801281263233	76.8212403011875	47
Full Hybrid WT	497	P3ID47	B54	0.6_23d	4065_P	0.218477307003999	0.593581761412973	76.3827408129085	50
Full Hybrid WT	498	P3ID47	A67	0.6_23d	4065_Q	0.222967157139603	0.603426522058506	77.0905149405383	48
Full Hybrid WT	499	P3ID47	B31	0.6_23d	4065_R	0.209208994234937	0.633769497315285	75.3291798715327	48
Full Hybrid WT	500	P3ID47	A49	0.6_23d	4065_S	0.226703127763949	0.594192751843356	77.0543102593241	48
Full Hybrid WT	501	P3ID47	A47	0.6_23d	4065_T	0.21211712746254	0.583668838834091	77.7132551095815	49
Full Hybrid WT	507	P3ID47	B54	0.6_23d	4065_Z	0.215071493691108	0.604238634217863	77.6310300760803	48
Full Hybrid WT	508	P3ID47	A67	0.6_23d	4065_AA	0.228078656055035	0.638346636920273	76.346434024569	48
Full Hybrid WT	509	P3ID47	B31	0.6_23d	4065_AB	0.224430042384286	0.725637463666211	77.1910988961665	48
Full Hybrid WT	510	P3ID47	A49	0.6_23d	4065_AC	0.215446439885469	0.581040398230966	78.5531041029877	49
Full Hybrid WT	511	P3ID47	A47	0.6_23d	4065_AD	0.189652906728877	0.816406898407047	74.7162272265075	49
Full Hybrid WT	518	P3ID47	A67	0.6_23d	4065_AK	0.204843458849083	0.606824535831203	77.7305991593887	50
Full Hybrid WT	519	P3ID47	B31	0.6_23d	4065_AL	0.209902168915753	0.632280866842544	77.9717418132566	46
Full Hybrid WT	520	P3ID47	A49	0.6_23d	4065_AM	0.225426731244336	0.582533521610107	76.9528483757539	50
Full Hybrid WT	521	P3ID47	A47	0.6_23d	4065_AN	0.230226185759642	0.60380582874334	76.5528449312155	49
Full Hybrid WT	527	P3ID47	B54	0.6_23d	4065_AT	0.19878093944838	0.66974143955276	74.6858855400493	49
Full Hybrid WT	528	P3ID47	A67	0.6_23d	4065_AU	0.225570885376184	0.613143048242099	77.7802033486297	49
Full Hybrid WT	529	P3ID47	B31	0.6_23d	4065_AV	0.215029751896842	0.587833631594816	77.7244070624803	49
Full Hybrid WT	530	P3ID47	A49	0.6_23d	4065_AW	0.218229687560303	0.578486293674427	77.609379297909	48
Full Hybrid WT	531	P3ID47	A47	0.6_23d	4065_AX	0.206355777469611	0.637721887707225	78.0992238038335	49
Full Hybrid WT	537	P3ID47	B54	0.6_23d	4065_BD	0.212039126608668	0.592847688020629	78.6865250775956	52
Full Hybrid WT	538	P3ID47	A67	0.6_23d	4065_BE	0.222343299823182	0.619163138382999	76.9859820469647	47
Full Hybrid WT	540	P3ID47	A49	0.6_23d	4065_BG	0.225575969546833	0.600327290852177	77.5305979221499	49
Full Hybrid WT	541	P3ID47	A47	0.6_23d	4065_BH	0.208758605191285	0.601165322570029	77.0455528809925	49
Full Hybrid WT	547	P3ID47	B54	0.6_23d	4065_BN	0.200040467650062	0.711211923434942	74.6764841196812	47
Full Hybrid WT	548	P3ID47	A67	0.6_23d	4065_BO	0.219395021309134	0.56416422202633	77.372178190145	53
Full Hybrid WT	549	P3ID47	B31	0.6_23d	4065_BP	0.212781115158438	0.562098432141738	77.97052263381	50
Full Hybrid WT	551	P3ID47	A47	0.6_23d	4065_BR	0.220411773876421	0.553919092574197	77.3893317625655	48
Full Hybrid WT	557	P3ID47	B54	0.6_23d	4065_BX	0.229170938331633	0.603071398501002	77.0894442590975	49
Full Hybrid WT	559	P3ID47	B31	0.6_23d	4065_BZ	0.205069487845702	0.644950498300688	77.758161822444	48
Full Hybrid WT	560	P3ID47	A49	0.6_23d	4065_CA	0.224113651011082	0.675014856948807	76.68002678752	48
Full Hybrid WT	561	P3ID47	A47	0.6_23d	4065_CB	0.189990158529724	0.69559748427673	73.3796224647961	49
Full Hybrid WT	567	P3ID47	B54	0.6_23d	4065_CH	0.213216511356956	0.583786198574258	77.4347653871136	48
Full Hybrid WT	568	P3ID47	A67	0.6_23d	4065_CI	0.222842052596203	0.618399484636529	76.6338114144791	48
Full Hybrid WT	569	P3ID47	B31	0.6_23d	4065_CJ	0.212984690283737	0.587866785926836	76.5378671458579	49
Full Hybrid WT	570	P3ID47	A49	0.6_23d	4065_CK	0.217990548920538	0.582988654337983	78.0752691624359	49
Full Hybrid WT	577	P3ID47	B54	0.6_23d	4067_BO	0.195881000444736	0.62621813301465	74.8277223778676	48
Full Hybrid WT	578	P3ID47	A67	0.6_23d	4066_A	0.214930823126911	0.591055745042007	77.7878584580397	49
Full Hybrid WT	579	P3ID47	B31	0.6_23d	4066_B	0.229141152749073	0.601064725744265	77.153928462328	47
Full Hybrid WT	580	P3ID47	A49	0.6_23d	4066_C	0.217412954954268	0.662498036940768	77.8224590601117	52
Full Hybrid WT	581	P3ID47	A47	0.6_23d	4066_D	0.229831124659215	0.578910480663248	76.5292734877986	49
Full Hybrid WT	587	P3ID47	B54	0.6_23d	4066_J	0.196033535459717	0.63651038617778	73.9798118511644	47
Full Hybrid WT	588	P3ID47	A67	0.6_23d	4066_K	0.228656949960581	0.611778223414165	77.2716049803422	48
Full Hybrid WT	589	P3ID47	B31	0.6_23d	4066_L	0.22373510814805	0.667073949523996	77.2485106540608	49
Full Hybrid WT	590	P3ID47	A49	0.6_23d	4066_M	0.223401767980974	0.564485272216155	77.5750803960487	49
Full Hybrid WT	591	P3ID47	A47	0.6_23d	4066_N	0.194134138359793	0.717231489952569	75.0019756061897	47
Full Hybrid WT	598	P3ID47	A67	0.6_23d	4066_U	0.22839632378873	0.62902125374693	76.580512225687	48
Full Hybrid WT	599	P3ID47	B31	0.6_23d	4066_V	0.216440136525334	0.630744502881135	77.8165641582274	48
Full Hybrid WT	601	P3ID47	A47	0.6_23d	4066_X	0.224701280534435	0.600531466831086	76.7631519078321	49
Full Hybrid WT	607	P3ID47	B54	0.6_23d	4066_AD	0.208505661703014	0.675124351257148	77.7462991587388	50
Full Hybrid WT	608	P3ID47	A67	0.6_23d	4066_AE	0.21442391228287	0.639846678542094	76.4104651797068	48
Full Hybrid WT	609	P3ID47	B31	0.6_23d	4066_AF	0.178959133596967	0.690723260138796	73.8039967074039	48
Full Hybrid WT	610	P3ID47	A49	0.6_23d	4066_AG	0.193881412146454	0.67364198457007	75.9589588881492	48
Full Hybrid WT	611	P3ID47	A47	0.6_23d	4066_AH	0.225657352693829	0.651309827194147	77.6546313658258	49
Full Hybrid WT	617	P3ID47	B54	0.6_23d	4066_AN	0.214951301464643	0.59357688750068	76.994407713975	49
Full Hybrid WT	618	P3ID47	A67	0.6_23d	4066_AO	0.21563894064035	0.762465811066695	75.8294234723663	50
Full Hybrid WT	619	P3ID47	B31	0.6_23d	4066_AP	0.208464322305242	0.542544884061234	77.9279000543599	50
Full Hybrid WT	620	P3ID47	A49	0.6_23d	4066_AQ	0.225737360950585	0.705840327625391	77.4498947143934	50
Full Hybrid WT	621	P3ID47	A47	0.6_23d	4066_AR	0.206499830637072	0.658528670611471	75.4917070674897	47
Full Hybrid WT	627	P3ID47	B54	0.6_23d	4066_AX	0.213380499660756	0.599894560128666	77.8637248277909	52
Full Hybrid WT	628	P3ID47	A67	0.6_23d	4066_AY	0.197487900904293	0.706406898754392	74.1365209958599	49
Full Hybrid WT	629	P3ID47	B31	0.6_23d	4066_AZ	0.198031914179182	0.576122490863145	77.399662020004	46
Full Hybrid WT	630	P3ID47	A49	0.6_23d	4066_BA	0.191582627275056	0.688224658787384	75.046151769608	46
Full Hybrid WT	631	P3ID47	A47	0.6_23d	4066_BB	0.229769636602435	0.616873786764802	77.3180781086739	48
Full Hybrid WT	637	P3ID47	B54	0.6_23d	4066_BH	0.202837747852704	0.569206010758398	77.6299070448062	50
Full Hybrid WT	638	P3ID47	A67	0.6_23d	4066_BI	0.216094226582251	0.643100211806985	76.7931550997636	50
Full Hybrid WT	639	P3ID47	B31	0.6_23d	4066_BJ	0.222253938628923	0.605703664200395	76.6999156342912	48
Full Hybrid WT	640	P3ID47	A49	0.6_23d	4066_BK	0.208067996275425	0.649798170348283	75.4674140236512	48
Full Hybrid WT	641	P3ID47	A47	0.6_23d	4066_BL	0.224957631429769	0.603983187228813	77.20400246342	48
Full Hybrid WT	647	P3ID47	B54	0.6_23d	4066_BR	0.218391922033819	0.578385015636978	77.7557053750961	49
Full Hybrid WT	648	P3ID47	A67	0.6_23d	4066_BS	0.216753253249467	0.615104418331749	76.9192547838233	49
Full Hybrid WT	649	P3ID47	B31	0.6_23d	4066_BT	0.198739103993894	0.658351870829063	76.1554962879181	47
Full Hybrid WT	650	P3ID47	A49	0.6_23d	4066_BU	0.209650678111191	0.703312942241511	74.1979099888348	49
Full Hybrid WT	651	P3ID47	A47	0.6_23d	4066_BV	0.201397301859218	0.675830802103714	74.9344629081862	49
Full Hybrid WT	657	P3ID47	B54	0.6_23d	4066_CB	0.206034535198958	0.625150575756019	77.3147613167597	49
Full Hybrid WT	658	P3ID47	A67	0.6_23d	4066_CC	0.177565229416479	0.674568021416403	71.9382034152648	48
Full Hybrid WT	659	P3ID47	B31	0.6_23d	4066_CD	0.213020557216814	0.591333220877687	78.036268670312	51
Full Hybrid WT	661	P3ID47	A47	0.6_23d	4066_CF	0.217502422722633	0.562515465269848	77.1924356744766	47
Full Hybrid WT	667	P3ID47	B54	0.6_23d	4066_CL	0.218226142324189	0.65846386137985	77.7735320049429	49
Full Hybrid WT	668	P3ID47	A67	0.6_23d	4066_CM	0.19752185846894	0.705093669108937	73.1101641074037	47
Full Hybrid WT	669	P3ID47	B31	0.6_23d	4066_CN	0.2099800283215	0.678588953710267	77.5924440455164	49
Full Hybrid WT	670	P3ID47	A49	0.6_23d	4066_CO	0.218499474880395	0.571303084403252	78.0608189379181	47
Full Hybrid WT	671	P3ID47	A47	0.6_23d	4066_CP	0.204590903066197	0.667739533303013	75.3566380894109	47
Full Hybrid WT	677	P3ID47	B54	0.6_23d	4067_D	0.205421054918423	0.65972253314827	77.4541982664932	49
Full Hybrid WT	678	P3ID47	A67	0.6_23d	4067_E	0.0693524154129515	0.695381526104418	69.6412904831533	55
Full Hybrid WT	679	P3ID47	B31	0.6_23d	4067_F	0.225070002772217	0.595435803262493	76.4782085359143	48
Full Hybrid WT	680	NA	NA	NA	4067_H	NA	NA	NA	NA
Full Hybrid WT	687	P3ID47	B54	0.6_23d	4067_N	0.183116810303022	0.641398640949505	73.4128121589415	52
Full Hybrid WT	689	P3ID47	B31	0.6_23d	4067_P	0.203454472679688	0.632856521309734	77.6910125285635	54
Full Hybrid WT	690	P3ID47	A49	0.6_23d	4067_Q	0.214654491234663	0.620253349417156	78.1699404400014	52
Full Hybrid WT	691	P3ID47	A47	0.6_23d	4067_R	0.194253756105671	0.649848613963644	73.9059131392123	47
Full Hybrid WT	697	P3ID47	B54	0.6_23d	4067_X	0.214511083905694	0.583320777750735	77.2811705721165	51
Full Hybrid WT	698	P3ID47	A67	0.6_23d	4067_Y	0.230210911932866	0.578466902699249	76.2648279880912	52
Full Hybrid WT	699	P3ID47	B31	0.6_23d	4067_Z	0.208857275736771	0.619978883589153	77.7471774976717	50
Full Hybrid WT	700	P3ID47	A49	0.6_23d	4067_AA	0.20383358061777	0.595815580097596	77.5573596411414	51
Full Hybrid WT	701	P3ID47	A47	0.6_23d	4067_AB	0.226703217322856	0.639178019666405	76.9262384615133	49
Full Hybrid WT	707	P3ID47	B54	0.6_23d	4067_AH	0.223256585995806	0.666743120549125	77.1027648654707	50
Full Hybrid WT	708	P3ID47	A67	0.6_23d	4067_AI	0.23197334507758	0.599035014420874	76.2767200618449	50
Full Hybrid WT	709	P3ID47	B31	0.6_23d	4067_AJ	0.208389452708553	0.583474165515703	77.3070419141637	49
Full Hybrid WT	710	P3ID47	A49	0.6_23d	4067_AK	0.199316385138439	0.653440029339704	74.7015146919048	48
Full Hybrid WT	711	P3ID47	A47	0.6_23d	4067_AL	0.227299242046345	0.623688913667603	76.9946850370053	49
Full Hybrid WT	717	P3ID47	B54	0.6_23d	4067_AR	0.20870768562322	0.654329506350358	77.2443846085914	49
Full Hybrid WT	718	P3ID47	A67	0.6_23d	4067_AS	0.176660363975996	0.693397344713134	71.4962798667386	52
Full Hybrid WT	719	P3ID47	B31	0.6_23d	4067_AT	0.209879015940262	0.641337062984628	77.5410997716871	51
Full Hybrid WT	720	P3ID47	A49	0.6_23d	4067_AU	0.210832573993788	0.596180389503847	78.1137454107442	50
Full Hybrid WT	721	P3ID47	A47	0.6_23d	4067_AV	0.222008669749894	0.625913802918177	77.3169102114823	50
Full Hybrid WT	665	P3ID47	ND	0.6_23d	4066_CJ	0.207741725512654	0.556981229194816	77.55580215819	52
Full Hybrid WT	353	P3ID47	ND	0.6_23d	4063_BL	0.223622809734244	0.556135336959528	76.7958350460779	51
Full Hybrid WT	682	P3ID47	ND	0.6_23d	4067_J	0.197363234215744	0.607483275910608	77.3503922322491	47

## Sheet: Full Hybrid recq4ab figl1
Population	ID_Pot_Pheno	ID_Manip_Pheno	Line	Treatment	ID_Geno	Relative Expansion Rate RER18-31 [no unit]	Compactness 31DAS [no unit]	Hue 31DAS [no unit]	Bolting_time [DAS]
Full Hybrid recq4ab figl1	4	P3ID47	A95	0.6_23d	4055_C	0.0653124262990441	0.823114338562718	72.4088400375551	50
Full Hybrid recq4ab figl1	5	P3ID47	C37	0.6_23d	4055_D	0.209940833408936	0.617377169685683	76.3224130950729	49
Full Hybrid recq4ab figl1	6	P3ID47	B63	0.6_23d	4055_E	0.208113987592161	0.512057507723473	75.7582052293584	52
Full Hybrid recq4ab figl1	12	P3ID47	A74	0.6_23d	4055_K	0.221279667317229	0.576390435737712	76.379617687922	50
Full Hybrid recq4ab figl1	13	P3ID47	B58	0.6_23d	4055_L	0.227723219104679	0.647134592702151	75.5944892395256	49
Full Hybrid recq4ab figl1	14	P3ID47	A95	0.6_23d	4055_M	0.189353561890736	0.766571625905396	74.1583027288461	50
Full Hybrid recq4ab figl1	15	P3ID47	C37	0.6_23d	4055_N	0.210934190713783	0.648879722508672	76.169232308531	46
Full Hybrid recq4ab figl1	16	P3ID47	B63	0.6_23d	4055_O	0.200819548678503	0.648702493555126	73.182806217245	49
Full Hybrid recq4ab figl1	22	P3ID47	A74	0.6_23d	4055_U	0.221052437836272	0.632236824005209	75.7703767822199	48
Full Hybrid recq4ab figl1	23	P3ID47	B58	0.6_23d	4055_V	0.161192699982926	0.817920145233915	73.4148864059472	50
Full Hybrid recq4ab figl1	24	P3ID47	A95	0.6_23d	4055_W	0.22079199610169	0.543638647880674	75.7344296795083	48
Full Hybrid recq4ab figl1	25	P3ID47	C37	0.6_23d	4055_X	0.208469965732326	0.626665073770981	76.0962071702019	50
Full Hybrid recq4ab figl1	26	P3ID47	B63	0.6_23d	4055_Y	0.22216144955811	0.630879761420632	75.3078482170333	49
Full Hybrid recq4ab figl1	32	P3ID47	A74	0.6_23d	4055_AE	0.22366695759601	0.617909496494582	75.7935737071238	49
Full Hybrid recq4ab figl1	33	P3ID47	B58	0.6_23d	4055_AF	0.209056181638019	0.668126097981856	75.837461002486	50
Full Hybrid recq4ab figl1	34	P3ID47	A95	0.6_23d	4055_AG	0.225836852861493	0.6238477486577	75.7622289258808	50
Full Hybrid recq4ab figl1	35	P3ID47	C37	0.6_23d	4055_AH	0.200944793797215	0.560954168216591	76.0784315208957	49
Full Hybrid recq4ab figl1	36	P3ID47	B63	0.6_23d	4055_AI	0.213081831198068	0.536414740348519	76.0936563358616	50
Full Hybrid recq4ab figl1	44	P3ID47	A95	0.6_23d	4055_AQ	0.224655134595569	0.576370613340763	75.7315882504411	50
Full Hybrid recq4ab figl1	45	P3ID47	C37	0.6_23d	4055_AR	0.210796825306459	0.581886206800987	76.2656436606846	51
Full Hybrid recq4ab figl1	46	P3ID47	B63	0.6_23d	4055_AS	0.224791300234738	0.557902712532202	74.874810075571	48
Full Hybrid recq4ab figl1	52	P3ID47	A74	0.6_23d	4055_AY	0.217095156147471	0.645356468578621	76.5751254284016	50
Full Hybrid recq4ab figl1	54	P3ID47	A95	0.6_23d	4055_BA	0.215179994966098	0.575516837653902	76.3326897970856	49
Full Hybrid recq4ab figl1	55	P3ID47	C37	0.6_23d	4055_BB	0.196317352727954	0.655302121720927	76.739880303136	50
Full Hybrid recq4ab figl1	56	P3ID47	B63	0.6_23d	4055_BC	0.218038070806191	0.584712138125935	76.0540748664242	52
Full Hybrid recq4ab figl1	62	P3ID47	A74	0.6_23d	4055_BI	0.205482504324915	0.585517188473146	76.6315820342816	47
Full Hybrid recq4ab figl1	63	P3ID47	B58	0.6_23d	4055_BJ	0.171510557825498	0.815569290493947	72.9589785693253	51
Full Hybrid recq4ab figl1	64	P3ID47	A95	0.6_23d	4055_BK	0.208611253921493	0.605864303809922	76.3185829389949	51
Full Hybrid recq4ab figl1	65	P3ID47	C37	0.6_23d	4055_BL	0.220400917385271	0.56444451417544	76.0216236640427	52
Full Hybrid recq4ab figl1	66	P3ID47	B63	0.6_23d	4055_BM	0.219571218842455	0.733544691122973	75.869014195555	52
Full Hybrid recq4ab figl1	72	P3ID47	A74	0.6_23d	4055_BS	0.216344605981286	0.659056508577195	74.7941264078584	47
Full Hybrid recq4ab figl1	73	P3ID47	B58	0.6_23d	4055_BT	0.195642250273951	0.621561499177703	72.9670213567724	48
Full Hybrid recq4ab figl1	75	P3ID47	C37	0.6_23d	4055_BV	0.215303041864305	0.618496079066337	77.1140659512337	46
Full Hybrid recq4ab figl1	76	P3ID47	B63	0.6_23d	4055_BW	0.20855452806736	0.625183651195657	74.0166103405232	50
Full Hybrid recq4ab figl1	82	P3ID47	A74	0.6_23d	4055_CC	0.210268962922598	0.611457347709422	77.1329476669511	49
Full Hybrid recq4ab figl1	83	P3ID47	B58	0.6_23d	4055_CD	0.221099626512292	0.598318595800276	76.2119251271748	49
Full Hybrid recq4ab figl1	84	P3ID47	A95	0.6_23d	4055_CE	0.210149496685117	0.534081620072953	76.9978125644214	51
Full Hybrid recq4ab figl1	85	P3ID47	C37	0.6_23d	4055_CF	0.214141805879544	0.542618661162051	76.4128534771547	52
Full Hybrid recq4ab figl1	86	P3ID47	B63	0.6_23d	4055_CG	0.234893659421553	0.584962868567913	74.2930357527941	47
Full Hybrid recq4ab figl1	92	P3ID47	A74	0.6_23d	4055_CM	0.196808262593623	0.66733579865482	74.5502234734155	47
Full Hybrid recq4ab figl1	93	P3ID47	B58	0.6_23d	4055_CN	0.212517843869488	0.604237006742785	76.3008377463519	45
Full Hybrid recq4ab figl1	94	P3ID47	A95	0.6_23d	4055_CO	0.222773645557742	0.609123662426033	76.4691296304173	52
Full Hybrid recq4ab figl1	95	P3ID47	C37	0.6_23d	4055_CP	0.200465621651739	0.708095500562079	74.4011224389477	50
Full Hybrid recq4ab figl1	96	P3ID47	B63	0.6_23d	4055_CQ	0.214739242040505	0.768509387858554	76.3245315427572	52
Full Hybrid recq4ab figl1	102	P3ID47	A74	0.6_23d	4056_E	0.227281750437468	0.647916957122397	75.7389596750859	50
Full Hybrid recq4ab figl1	103	P3ID47	B58	0.6_23d	4056_F	0.186626118773283	0.762499936645025	75.3745397190581	50
Full Hybrid recq4ab figl1	104	P3ID47	A95	0.6_23d	4056_G	0.213672923989772	0.585291441259707	75.5539064897505	48
Full Hybrid recq4ab figl1	105	P3ID47	C37	0.6_23d	4056_H	0.214925220586121	0.580988167937191	76.7529448910005	47
Full Hybrid recq4ab figl1	106	P3ID47	B63	0.6_23d	4056_I	0.236079706563817	0.622394508137017	75.551399988868	50
Full Hybrid recq4ab figl1	112	P3ID47	A74	0.6_23d	4056_O	0.217072308094945	0.609575062777842	75.5918198669384	49
Full Hybrid recq4ab figl1	113	P3ID47	B58	0.6_23d	4056_P	0.219631221538523	0.559261502767961	75.6754660898378	50
Full Hybrid recq4ab figl1	114	P3ID47	A95	0.6_23d	4056_Q	0.224855857073675	0.538655477126042	76.1126370636105	49
Full Hybrid recq4ab figl1	115	P3ID47	C37	0.6_23d	4056_R	0.211330867821122	0.564335157164703	77.1290617571081	50
Full Hybrid recq4ab figl1	116	P3ID47	B63	0.6_23d	4056_S	0.218568310427034	0.649205999469921	76.2344085901501	50
Full Hybrid recq4ab figl1	122	P3ID47	A74	0.6_23d	4056_Y	0.219815270902404	0.617946854117278	76.6178753002081	49
Full Hybrid recq4ab figl1	123	P3ID47	B58	0.6_23d	4056_Z	0.206594703011509	0.548940966711209	77.1621737296402	48
Full Hybrid recq4ab figl1	124	P3ID47	A95	0.6_23d	4056_AA	0.229527654241165	0.548992353306683	76.4936694787553	49
Full Hybrid recq4ab figl1	125	P3ID47	C37	0.6_23d	4056_AB	0.210063450703532	0.555985429119757	76.7608518436661	50
Full Hybrid recq4ab figl1	126	P3ID47	B63	0.6_23d	4056_AC	0.208008318748401	0.594524294754907	76.4190506899279	48
Full Hybrid recq4ab figl1	132	P3ID47	A74	0.6_23d	4056_AI	0.217625957112544	0.56050216735532	76.8579746188351	50
Full Hybrid recq4ab figl1	133	P3ID47	B58	0.6_23d	4056_AJ	0.215836526151618	0.556954162470106	76.1424780149718	49
Full Hybrid recq4ab figl1	134	P3ID47	A95	0.6_23d	4056_AK	0.224882672116986	0.589900077532096	75.9244237731857	49
Full Hybrid recq4ab figl1	135	P3ID47	C37	0.6_23d	4056_AL	0.224017172757695	0.653115027057028	77.1449952420362	50
Full Hybrid recq4ab figl1	136	P3ID47	B63	0.6_23d	4056_AM	0.209360867974686	0.655855249630834	74.984510527233	48
Full Hybrid recq4ab figl1	142	P3ID47	A74	0.6_23d	4056_AS	0.197472669196544	0.681378948404238	72.7115919675259	50
Full Hybrid recq4ab figl1	143	P3ID47	B58	0.6_23d	4056_AT	0.227245254857504	0.609692530889036	75.4265707693722	49
Full Hybrid recq4ab figl1	144	P3ID47	A95	0.6_23d	4056_AU	0.205477479953388	0.688195822484257	76.2839562616225	50
Full Hybrid recq4ab figl1	145	P3ID47	C37	0.6_23d	4056_AV	0.206126426373662	0.548330354131802	76.8352978480795	49
Full Hybrid recq4ab figl1	146	P3ID47	B63	0.6_23d	4056_AW	0.210543039239426	0.627488338110493	75.5150053086925	52
Full Hybrid recq4ab figl1	153	P3ID47	B58	0.6_23d	4056_BD	0.217458077237572	0.714918623602599	73.3697884867366	52
Full Hybrid recq4ab figl1	154	P3ID47	A95	0.6_23d	4056_BE	0.212237666378372	0.600595805993107	76.9402272149214	52
Full Hybrid recq4ab figl1	155	P3ID47	C37	0.6_23d	4056_BF	0.206369692098054	0.608207601103627	76.6087112214283	50
Full Hybrid recq4ab figl1	156	P3ID47	B63	0.6_23d	4056_BG	0.218821387286393	0.63523838255176	76.3407198779561	49
Full Hybrid recq4ab figl1	162	P3ID47	A74	0.6_23d	4056_BM	0.220932692204822	0.690987613224241	76.8294651247486	49
Full Hybrid recq4ab figl1	163	P3ID47	B58	0.6_23d	4056_BN	0.222658023403486	0.551986835066966	75.0841239442759	47
Full Hybrid recq4ab figl1	164	P3ID47	A95	0.6_23d	4056_BO	0.216228982131923	0.637664930647257	76.1859164138229	49
Full Hybrid recq4ab figl1	165	P3ID47	C37	0.6_23d	4056_BP	0.212615425381182	0.538678546434343	76.5906439177975	49
Full Hybrid recq4ab figl1	166	P3ID47	B63	0.6_23d	4056_BQ	0.197534513124838	0.791785560418839	74.2704905978442	50
Full Hybrid recq4ab figl1	172	P3ID47	A74	0.6_23d	4056_BW	0.196321765981692	0.66374014071656	73.9937645639498	46
Full Hybrid recq4ab figl1	173	P3ID47	B58	0.6_23d	4056_BX	0.195060263729872	0.672411045144838	71.7169449561485	47
Full Hybrid recq4ab figl1	174	P3ID47	A95	0.6_23d	4056_BY	0.217067523557422	0.592745156540235	75.7876468483933	49
Full Hybrid recq4ab figl1	175	P3ID47	C37	0.6_23d	4056_BZ	0.209602806586808	0.660847402603949	76.7872574885249	49
Full Hybrid recq4ab figl1	176	P3ID47	B63	0.6_23d	4056_CA	0.210455340129336	0.654718525479734	74.5077071724213	46
Full Hybrid recq4ab figl1	182	P3ID47	A74	0.6_23d	4056_CG	0.186736871922294	0.651721487131256	73.1882934637424	49
Full Hybrid recq4ab figl1	184	P3ID47	A95	0.6_23d	4056_CI	0.22030302377643	0.601892880539381	77.1591595938564	49
Full Hybrid recq4ab figl1	185	P3ID47	C37	0.6_23d	4056_CJ	0.226890938385473	0.6265898315926	76.1879230094426	48
Full Hybrid recq4ab figl1	186	P3ID47	B63	0.6_23d	4056_CK	0.205613864507985	0.623066098744173	74.0981628958831	48
Full Hybrid recq4ab figl1	192	P3ID47	A74	0.6_23d	4056_CQ	0.223352967739079	0.637017116947153	76.8183705974089	49
Full Hybrid recq4ab figl1	193	P3ID47	B58	0.6_23d	4067_BK	0.213313220277419	0.650903071183258	76.7345501536415	52
Full Hybrid recq4ab figl1	194	P3ID47	A95	0.6_23d	4062_A	0.22000689028113	0.64163392511441	76.4006433019458	48
Full Hybrid recq4ab figl1	195	P3ID47	C37	0.6_23d	4062_B	0.211354640912724	0.590013959855251	77.3147140848224	48
Full Hybrid recq4ab figl1	196	P3ID47	B63	0.6_23d	4062_C	0.224477869263504	0.659149570645068	74.1509515644496	46
Full Hybrid recq4ab figl1	202	P3ID47	A74	0.6_23d	4062_I	0.219265008161803	0.613575497772012	76.9843373930457	51
Full Hybrid recq4ab figl1	204	P3ID47	A95	0.6_23d	4062_K	0.215194311320614	0.578614742726107	77.1140768373549	46
Full Hybrid recq4ab figl1	205	P3ID47	C37	0.6_23d	4062_L	0.190065985701278	0.761532104119889	74.3016993940498	50
Full Hybrid recq4ab figl1	206	P3ID47	B63	0.6_23d	4062_M	0.23352854143296	0.554181980175966	75.8761119344528	49
Full Hybrid recq4ab figl1	212	P3ID47	A74	0.6_23d	4062_S	0.212976402203641	0.561884051992543	76.514471040627	46
Full Hybrid recq4ab figl1	213	P3ID47	B58	0.6_23d	4062_T	0.203475854417661	0.609746658665036	73.3274271214512	47
Full Hybrid recq4ab figl1	214	P3ID47	A95	0.6_23d	4062_U	0.200496811202546	0.660988286401365	74.4234419316471	47
Full Hybrid recq4ab figl1	215	P3ID47	C37	0.6_23d	4062_V	0.196943210490955	0.607134559985131	74.2087011042899	46
Full Hybrid recq4ab figl1	216	P3ID47	B63	0.6_23d	4062_W	0.206787421172179	0.715502855600778	75.8161633742684	49
Full Hybrid recq4ab figl1	222	P3ID47	A74	0.6_23d	4062_AC	0.210599951081962	0.727164680689747	74.7254841120352	50
Full Hybrid recq4ab figl1	223	P3ID47	B58	0.6_23d	4062_AD	0.226018340982677	0.581256696657909	75.9444222776304	50
Full Hybrid recq4ab figl1	224	P3ID47	A95	0.6_23d	4062_AE	0.206415817072704	0.613757650811186	72.7334536768592	48
Full Hybrid recq4ab figl1	225	P3ID47	C37	0.6_23d	4062_AF	0.221172205274821	0.590962855442352	77.7315280571629	49
Full Hybrid recq4ab figl1	226	P3ID47	B63	0.6_23d	4062_AG	0.208583387170498	0.628256814241652	74.2135291386359	48
Full Hybrid recq4ab figl1	232	P3ID47	A74	0.6_23d	4062_AM	0.231117202412291	0.658613271553864	76.4413224641074	48
Full Hybrid recq4ab figl1	233	P3ID47	B58	0.6_23d	4062_AN	0.228971393176361	0.54899052223944	75.4649948653251	49
Full Hybrid recq4ab figl1	234	P3ID47	A95	0.6_23d	4062_AO	0.210251359509031	0.514045605443144	76.1829891371348	50
Full Hybrid recq4ab figl1	235	P3ID47	C37	0.6_23d	4062_AP	0.217512690325271	0.608091858825328	76.7951695000397	48
Full Hybrid recq4ab figl1	236	P3ID47	B63	0.6_23d	4062_AQ	0.2352687297987	0.671661437381916	76.2509887538399	49
Full Hybrid recq4ab figl1	242	P3ID47	A74	0.6_23d	4062_AW	0.206209240254722	0.62541144689369	76.6815184803047	49
Full Hybrid recq4ab figl1	243	P3ID47	B58	0.6_23d	4062_AX	0.202580684266831	0.633426211076893	73.7703464451968	47
Full Hybrid recq4ab figl1	244	P3ID47	A95	0.6_23d	4062_AY	0.21851723454481	0.675119111557719	76.2634006713726	51
Full Hybrid recq4ab figl1	245	P3ID47	C37	0.6_23d	4062_AZ	0.201246578838616	0.525345384949419	76.4342802602112	46
Full Hybrid recq4ab figl1	246	P3ID47	B63	0.6_23d	4062_BA	0.224388942533917	0.596658682965517	76.1845188817462	46
Full Hybrid recq4ab figl1	252	P3ID47	A74	0.6_23d	4062_BG	0.21417674534767	0.589803972084573	76.3883368417183	50
Full Hybrid recq4ab figl1	253	P3ID47	B58	0.6_23d	4062_BH	0.217588726861487	0.578550558226797	76.8333343547782	50
Full Hybrid recq4ab figl1	254	P3ID47	A95	0.6_23d	4062_BI	0.225630498127435	0.530481034752912	76.3686818148063	48
Full Hybrid recq4ab figl1	255	P3ID47	C37	0.6_23d	4062_BJ	0.200526724985069	0.632763515307477	74.7553570438172	46
Full Hybrid recq4ab figl1	256	P3ID47	B63	0.6_23d	4062_BK	0.213708789167079	0.548588742744195	77.4368747992805	49
Full Hybrid recq4ab figl1	262	P3ID47	A74	0.6_23d	4062_BQ	0.200213275216395	0.67020698857994	74.1676586198165	46
Full Hybrid recq4ab figl1	263	P3ID47	B58	0.6_23d	4062_BR	0.203986978103318	0.782764873499698	74.1462257014571	50
Full Hybrid recq4ab figl1	264	P3ID47	A95	0.6_23d	4062_BS	0.216763177543593	0.584974154054259	76.8030605384165	47
Full Hybrid recq4ab figl1	265	P3ID47	C37	0.6_23d	4062_BT	0.205386200101048	0.600468501536024	77.0848050209112	51
Full Hybrid recq4ab figl1	266	P3ID47	B63	0.6_23d	4062_BU	0.203327664934761	0.643317859760567	75.9358939950591	48
Full Hybrid recq4ab figl1	272	P3ID47	A74	0.6_23d	4062_CA	0.206991642290022	0.6769868578815	76.8342209403191	50
Full Hybrid recq4ab figl1	273	P3ID47	B58	0.6_23d	4062_CB	0.216357076414658	0.556568143209466	76.9068768746031	49
Full Hybrid recq4ab figl1	274	P3ID47	A95	0.6_23d	4062_CC	0.222340708874234	0.59247924018906	77.1292994378516	47
Full Hybrid recq4ab figl1	276	P3ID47	B63	0.6_23d	4062_CE	0.241472949995814	0.636799201068412	75.5153938018318	51
Full Hybrid recq4ab figl1	282	P3ID47	A74	0.6_23d	4062_CK	0.203063768433254	0.551294887717862	76.67451267241	46
Full Hybrid recq4ab figl1	283	P3ID47	B58	0.6_23d	4062_CL	0.223582797807283	0.57442664406454	76.301848021486	46
Full Hybrid recq4ab figl1	284	P3ID47	A95	0.6_23d	4062_CM	0.229916599889423	0.548843007260539	75.9442186086664	47
Full Hybrid recq4ab figl1	285	P3ID47	C37	0.6_23d	4062_CN	0.218862420536122	0.566318059612938	77.5810514046663	47
Full Hybrid recq4ab figl1	286	P3ID47	B63	0.6_23d	4062_CO	0.214053975732606	0.70131869065774	75.9696691951452	49
Full Hybrid recq4ab figl1	292	P3ID47	A74	0.6_23d	4063_C	0.221586620731937	0.591981560330995	77.5443984163002	47
Full Hybrid recq4ab figl1	293	P3ID47	B58	0.6_23d	4063_D	0.223858135620369	0.630219230761987	76.6373858871894	47
Full Hybrid recq4ab figl1	294	P3ID47	A95	0.6_23d	4063_E	0.204238944494708	0.553943278794694	75.3716658769753	46
Full Hybrid recq4ab figl1	295	P3ID47	C37	0.6_23d	4063_F	0.203930686191396	0.668013381584418	74.2057396729847	46
Full Hybrid recq4ab figl1	296	P3ID47	B63	0.6_23d	4063_G	0.222368552927503	0.586515492667985	77.3081712397443	48
Full Hybrid recq4ab figl1	302	P3ID47	A74	0.6_23d	4063_M	0.220996169186494	0.582097257115325	77.0307729198305	45
Full Hybrid recq4ab figl1	303	P3ID47	B58	0.6_23d	4063_N	0.183050402412771	0.589969837482555	72.5883244965496	52
Full Hybrid recq4ab figl1	304	P3ID47	A95	0.6_23d	4063_O	0.217433467930062	0.650127110409569	76.0902904371539	49
Full Hybrid recq4ab figl1	305	P3ID47	C37	0.6_23d	4063_P	0.211178054480304	0.657937931296628	76.9743378163346	50
Full Hybrid recq4ab figl1	306	P3ID47	B63	0.6_23d	4063_Q	0.208094645633526	0.644912066686998	74.9398803267646	47
Full Hybrid recq4ab figl1	312	P3ID47	A74	0.6_23d	4063_W	0.20408119231824	0.611709550248878	77.0477996146876	49
Full Hybrid recq4ab figl1	313	P3ID47	B58	0.6_23d	4063_X	0.224615953100297	0.586247720654274	76.4962113877534	49
Full Hybrid recq4ab figl1	314	P3ID47	A95	0.6_23d	4063_Y	0.22417386042143	0.595783060087385	76.9042641820281	49
Full Hybrid recq4ab figl1	316	P3ID47	B63	0.6_23d	4063_AA	0.214852562771362	0.641271161545647	76.5901543261005	47
Full Hybrid recq4ab figl1	322	P3ID47	A74	0.6_23d	4063_AG	0.205511527028324	0.706503597058346	77.3393524569598	50
Full Hybrid recq4ab figl1	324	P3ID47	A95	0.6_23d	4063_AI	0.217661181138525	0.560262935906355	77.1078453260916	47
Full Hybrid recq4ab figl1	325	P3ID47	C37	0.6_23d	4063_AJ	0.208083289781895	0.564139992353943	75.9157724011915	49
Full Hybrid recq4ab figl1	326	P3ID47	B63	0.6_23d	4063_AK	0.226276422525997	0.599862896914404	76.0634472192645	50
Full Hybrid recq4ab figl1	332	P3ID47	A74	0.6_23d	4063_AQ	0.20775652291028	0.632535099963363	76.7013801305708	48
Full Hybrid recq4ab figl1	333	P3ID47	B58	0.6_23d	4063_AR	0.221906007457557	0.633405689412718	76.1896195721672	48
Full Hybrid recq4ab figl1	334	P3ID47	A95	0.6_23d	4063_AS	0.210408642628444	0.593905879348175	77.3669829757584	49
Full Hybrid recq4ab figl1	336	P3ID47	B63	0.6_23d	4063_AU	0.225957249266999	0.621912800965859	75.9401266327774	48
Full Hybrid recq4ab figl1	342	P3ID47	A74	0.6_23d	4063_BA	0.194760538261159	0.806034702730288	74.1049796847703	49
Full Hybrid recq4ab figl1	343	P3ID47	B58	0.6_23d	4063_BB	0.219186765923426	0.578866259468023	76.8326768015436	47
Full Hybrid recq4ab figl1	344	P3ID47	A95	0.6_23d	4063_BC	0.224473724230132	0.584659619106643	75.7612537451585	48
Full Hybrid recq4ab figl1	345	P3ID47	C37	0.6_23d	4063_BD	0.20356435044972	0.682141921275236	75.8371603928809	49
Full Hybrid recq4ab figl1	346	P3ID47	B63	0.6_23d	4063_BE	0.22270074676351	0.60275791009529	77.1855173944973	50
Full Hybrid recq4ab figl1	352	P3ID47	A74	0.6_23d	4063_BK	0.211789927017526	0.572241337168857	77.4274636217546	49
Full Hybrid recq4ab figl1	354	P3ID47	A95	0.6_23d	4063_BM	0.197632720164698	0.652468604181568	74.4793691983691	47
Full Hybrid recq4ab figl1	355	P3ID47	C37	0.6_23d	4063_BN	0.211834439633267	0.593436013172594	77.3169269874891	48
Full Hybrid recq4ab figl1	356	P3ID47	B63	0.6_23d	4063_BO	0.225448727561953	0.557867076087277	76.9131031490909	48
Full Hybrid recq4ab figl1	362	P3ID47	A74	0.6_23d	4063_BU	0.215841148201135	0.577023356201884	76.7112436846606	50
Full Hybrid recq4ab figl1	363	P3ID47	B58	0.6_23d	4063_BV	0.194326111058388	0.624094095283355	74.922625556981	48
Full Hybrid recq4ab figl1	364	P3ID47	A95	0.6_23d	4063_BW	0.218549546473755	0.583967026253286	77.1949040174803	49
Full Hybrid recq4ab figl1	365	P3ID47	C37	0.6_23d	4063_BX	0.220699298842659	0.596797746732013	77.7004927623122	49
Full Hybrid recq4ab figl1	366	P3ID47	B63	0.6_23d	4063_BY	0.222724025717784	0.625930304704695	76.7255552465232	49
Full Hybrid recq4ab figl1	372	P3ID47	A74	0.6_23d	4063_CE	0.216504584314931	0.565679862710069	76.4153755495442	49
Full Hybrid recq4ab figl1	373	P3ID47	B58	0.6_23d	4063_CF	0.222564966078395	0.576187416751547	77.3844541033731	47
Full Hybrid recq4ab figl1	374	P3ID47	A95	0.6_23d	4063_CG	0.216025238694456	0.532218203360736	77.0769394273972	49
Full Hybrid recq4ab figl1	375	P3ID47	C37	0.6_23d	4063_CH	0.21291644007065	0.650278719613815	76.9962327352956	NA
Full Hybrid recq4ab figl1	376	P3ID47	B63	0.6_23d	4063_CI	0.202233166386921	0.610032023777131	73.5852713467048	46
Full Hybrid recq4ab figl1	382	P3ID47	A74	0.6_23d	4063_CO	0.204164830892789	0.647884163178487	74.3331653632085	47
Full Hybrid recq4ab figl1	383	P3ID47	B58	0.6_23d	4063_CP	0.229525535156588	0.591098863530411	76.6608769755848	49
Full Hybrid recq4ab figl1	384	P3ID47	A95	0.6_23d	4063_CQ	0.228509449090935	0.629397832741866	76.6201498590056	46
Full Hybrid recq4ab figl1	386	P3ID47	B63	0.6_23d	4064_A	0.20192519476581	0.654526244201015	75.2389605508192	48
Full Hybrid recq4ab figl1	392	P3ID47	A74	0.6_23d	4064_G	0.198227446343196	0.689946764843644	77.9433150661313	52
Full Hybrid recq4ab figl1	393	P3ID47	B58	0.6_23d	4064_H	0.222724113149523	0.606732136199571	76.0898817345597	52
Full Hybrid recq4ab figl1	395	P3ID47	C37	0.6_23d	4064_J	0.202144277740024	0.64363028421304	74.6871767406379	48
Full Hybrid recq4ab figl1	396	P3ID47	B63	0.6_23d	4064_K	0.219487490473531	0.639014844775331	76.8202284289275	49
Full Hybrid recq4ab figl1	402	P3ID47	A74	0.6_23d	4064_Q	0.219733547927204	0.593520891417199	77.4630597380212	50
Full Hybrid recq4ab figl1	403	P3ID47	B58	0.6_23d	4064_R	0.213218029743346	0.553883788362948	76.2963392938519	48
Full Hybrid recq4ab figl1	404	P3ID47	A95	0.6_23d	4064_S	0.22908988377452	0.604079653426168	76.5310285049498	49
Full Hybrid recq4ab figl1	405	P3ID47	C37	0.6_23d	4064_T	0.182863858065791	0.672255408865017	72.7573668830446	49
Full Hybrid recq4ab figl1	406	P3ID47	B63	0.6_23d	4064_U	0.221064705928547	0.628664063700274	76.1221025727805	49
Full Hybrid recq4ab figl1	412	P3ID47	A74	0.6_23d	4064_AA	0.214918333125521	0.704170217548066	76.591696300423	50
Full Hybrid recq4ab figl1	413	P3ID47	B58	0.6_23d	4064_AB	0.219293738669428	0.678060562291134	75.9707587499057	50
Full Hybrid recq4ab figl1	414	P3ID47	A95	0.6_23d	4064_AC	0.2166512772739	0.556902654137137	76.8896181411576	49
Full Hybrid recq4ab figl1	415	P3ID47	C37	0.6_23d	4064_AD	0.202442985847696	0.658906873406273	75.0567040118539	48
Full Hybrid recq4ab figl1	416	P3ID47	B63	0.6_23d	4064_AE	0.216999714684846	0.665666910278192	77.3731983657094	49
Full Hybrid recq4ab figl1	422	P3ID47	A74	0.6_23d	4064_AK	0.199974023282308	0.629707984944552	75.1604962444495	48
Full Hybrid recq4ab figl1	423	P3ID47	B58	0.6_23d	4064_AL	0.228291184075399	0.625469570657472	76.5740760737068	48
Full Hybrid recq4ab figl1	424	P3ID47	A95	0.6_23d	4064_AM	0.220976674997942	0.625946282794292	77.7572995474292	49
Full Hybrid recq4ab figl1	425	P3ID47	C37	0.6_23d	4064_AN	0.228848264795062	0.610058387362539	76.3585258573332	50
Full Hybrid recq4ab figl1	426	P3ID47	B63	0.6_23d	4064_AO	0.185046973033278	0.682743112558114	74.0069843465842	48
Full Hybrid recq4ab figl1	432	P3ID47	A74	0.6_23d	4064_AU	0.217390003440731	0.674237485716039	76.8259195788629	49
Full Hybrid recq4ab figl1	433	P3ID47	B58	0.6_23d	4064_AV	0.222678004419768	0.59348604236317	76.650238956053	49
Full Hybrid recq4ab figl1	434	P3ID47	A95	0.6_23d	4064_AW	0.212470509872966	0.619877928708383	76.7726801108835	48
Full Hybrid recq4ab figl1	435	P3ID47	C37	0.6_23d	4064_AX	0.228268187808496	0.596923722872642	76.3140473834624	47
Full Hybrid recq4ab figl1	436	P3ID47	B63	0.6_23d	4064_AY	0.229548721350471	0.617369885417394	77.8021641869236	49
Full Hybrid recq4ab figl1	442	P3ID47	A74	0.6_23d	4064_BE	0.20866005173843	0.682926557698303	77.1868955825316	47
Full Hybrid recq4ab figl1	443	P3ID47	B58	0.6_23d	4064_BF	0.221520874012982	0.634553177188013	75.9177586198549	47
Full Hybrid recq4ab figl1	444	P3ID47	A95	0.6_23d	4064_BG	0.208798406915448	0.638301040882869	75.1601712542253	49
Full Hybrid recq4ab figl1	445	P3ID47	C37	0.6_23d	4064_BH	0.215079415918599	0.577444461340669	77.849246582687	49
Full Hybrid recq4ab figl1	446	P3ID47	B63	0.6_23d	4064_BI	0.226443864639168	0.632279194228733	76.5034103190477	47
Full Hybrid recq4ab figl1	452	P3ID47	A74	0.6_23d	4064_BO	0.232213499911151	0.577559426256499	77.0192228443374	48
Full Hybrid recq4ab figl1	453	P3ID47	B58	0.6_23d	4064_BP	0.211903572107758	0.559948049482436	76.5613485757314	49
Full Hybrid recq4ab figl1	454	P3ID47	A95	0.6_23d	4064_BQ	0.202662685499427	0.569527218581179	77.162462667984	50
Full Hybrid recq4ab figl1	455	P3ID47	C37	0.6_23d	4064_BR	0.207293867139389	0.597676629340208	76.3649498825691	47
Full Hybrid recq4ab figl1	456	P3ID47	B63	0.6_23d	4064_BS	0.220708117894807	0.548089615926461	76.4678054252821	50
Full Hybrid recq4ab figl1	462	P3ID47	A74	0.6_23d	4064_BY	0.212872533512215	0.579367719380634	77.6954994094339	47
Full Hybrid recq4ab figl1	463	P3ID47	B58	0.6_23d	4064_BZ	0.212346886603842	0.532223566122423	77.0208908269385	50
Full Hybrid recq4ab figl1	464	P3ID47	A95	0.6_23d	4064_CA	0.207082210573163	0.609939258692777	76.6345436809957	49
Full Hybrid recq4ab figl1	465	P3ID47	C37	0.6_23d	4064_CB	0.217668762816156	0.590254028663056	77.120192541143	52
Full Hybrid recq4ab figl1	472	P3ID47	A74	0.6_23d	4064_CI	0.203938578417172	0.643422234737251	75.3936204001995	47
Full Hybrid recq4ab figl1	473	P3ID47	B58	0.6_23d	4064_CJ	0.188210598946004	0.64038756412281	73.8163521333112	48
Full Hybrid recq4ab figl1	474	P3ID47	A95	0.6_23d	4064_CK	0.180278780208004	0.612935162548239	74.186995281916	47
Full Hybrid recq4ab figl1	475	P3ID47	C37	0.6_23d	4064_CL	0.200129066715095	0.677146708319258	75.919088545356	47
Full Hybrid recq4ab figl1	476	P3ID47	B63	0.6_23d	4064_CM	0.204345720149775	0.631013767634996	74.6027499036028	46
Full Hybrid recq4ab figl1	482	P3ID47	A74	0.6_23d	4065_A	0.20952522422167	0.65965580502139	78.0047219704705	50
Full Hybrid recq4ab figl1	483	P3ID47	B58	0.6_23d	4065_B	0.229093443857232	0.566081860576458	77.4260590492141	48
Full Hybrid recq4ab figl1	484	P3ID47	A95	0.6_23d	4065_C	0.2242768965409	0.730711676582289	77.6975571539178	49
Full Hybrid recq4ab figl1	485	P3ID47	C37	0.6_23d	4065_D	0.215193572618404	0.581518949116715	77.6465157488643	49
Full Hybrid recq4ab figl1	486	P3ID47	B63	0.6_23d	4065_E	0.230887097452304	0.587953804780211	76.7960848355971	48
Full Hybrid recq4ab figl1	492	P3ID47	A74	0.6_23d	4065_K	0.209280871234591	0.561658849666749	77.0258775209704	48
Full Hybrid recq4ab figl1	493	P3ID47	B58	0.6_23d	4065_L	0.220084554795144	0.71971139460871	76.780492044825	49
Full Hybrid recq4ab figl1	494	P3ID47	A95	0.6_23d	4065_M	0.224470771063723	0.604811629460844	76.9934076359829	47
Full Hybrid recq4ab figl1	495	P3ID47	C37	0.6_23d	4065_N	0.208106669047224	0.539579096609617	77.9181318658594	48
Full Hybrid recq4ab figl1	496	P3ID47	B63	0.6_23d	4065_O	0.225205272914764	0.625806204351587	77.0586153931045	50
Full Hybrid recq4ab figl1	502	P3ID47	A74	0.6_23d	4065_U	0.223838553011491	0.649126122234906	77.842836418257	49
Full Hybrid recq4ab figl1	503	P3ID47	B58	0.6_23d	4065_V	0.211472674803179	0.601722844739414	77.078329934886	51
Full Hybrid recq4ab figl1	504	P3ID47	A95	0.6_23d	4065_W	0.226731749151519	0.588262923048822	77.7108741668904	48
Full Hybrid recq4ab figl1	505	P3ID47	C37	0.6_23d	4065_X	0.216158207158953	0.608499128985112	77.3635701543789	49
Full Hybrid recq4ab figl1	506	P3ID47	B63	0.6_23d	4065_Y	0.218780286166326	0.584524148485603	77.0270692538358	47
Full Hybrid recq4ab figl1	512	P3ID47	A74	0.6_23d	4065_AE	0.222980121496105	0.641655891714957	77.2747682511019	48
Full Hybrid recq4ab figl1	513	P3ID47	B58	0.6_23d	4065_AF	0.215390669310023	0.562834576731452	76.8085702999741	48
Full Hybrid recq4ab figl1	514	P3ID47	A95	0.6_23d	4065_AG	0.200841911012597	0.630412528388868	74.5057873922924	49
Full Hybrid recq4ab figl1	515	P3ID47	C37	0.6_23d	4065_AH	0.210463639203468	0.610119383791956	77.4464174108187	46
Full Hybrid recq4ab figl1	522	P3ID47	A74	0.6_23d	4065_AO	0.22278110084913	0.650035870566755	76.6406991548989	48
Full Hybrid recq4ab figl1	523	P3ID47	B58	0.6_23d	4065_AP	0.228566276856476	0.621529289089435	76.6825513157789	47
Full Hybrid recq4ab figl1	524	P3ID47	A95	0.6_23d	4065_AQ	0.213554957479504	0.550893208280202	77.5719382972838	49
Full Hybrid recq4ab figl1	525	P3ID47	C37	0.6_23d	4065_AR	0.193030075285513	0.758046597382541	74.8589173191719	49
Full Hybrid recq4ab figl1	526	P3ID47	B63	0.6_23d	4065_AS	0.21923090128919	0.568037894982864	77.2737488426098	51
Full Hybrid recq4ab figl1	532	P3ID47	A74	0.6_23d	4065_AY	0.191777129866616	0.753737595185202	74.8736437800534	49
Full Hybrid recq4ab figl1	534	P3ID47	A95	0.6_23d	4065_BA	0.190094879680485	0.656956766463856	75.5844165152329	46
Full Hybrid recq4ab figl1	535	P3ID47	C37	0.6_23d	4065_BB	0.222346301309698	0.612860099598664	77.0066483094612	49
Full Hybrid recq4ab figl1	536	P3ID47	B63	0.6_23d	4065_BC	0.228209588798209	0.533957831933015	75.8809205892752	48
Full Hybrid recq4ab figl1	542	P3ID47	A74	0.6_23d	4065_BI	0.218468310468022	0.634264547649259	76.8252081569504	48
Full Hybrid recq4ab figl1	543	P3ID47	B58	0.6_23d	4065_BJ	0.198091137291775	0.643331789722564	74.1874649820469	47
Full Hybrid recq4ab figl1	545	P3ID47	C37	0.6_23d	4065_BL	0.215153189468609	0.581573251233514	77.4575698342449	49
Full Hybrid recq4ab figl1	546	P3ID47	B63	0.6_23d	4065_BM	0.201824951938283	0.596238379589881	76.6525268037293	48
Full Hybrid recq4ab figl1	552	P3ID47	A74	0.6_23d	4065_BS	0.219435675162796	0.615185389576107	77.7034228171891	47
Full Hybrid recq4ab figl1	553	P3ID47	B58	0.6_23d	4065_BT	0.215691195763228	0.634724408838151	77.1273412741476	49
Full Hybrid recq4ab figl1	554	P3ID47	A95	0.6_23d	4065_BU	0.198819767394172	0.680653780469668	74.0834599664978	46
Full Hybrid recq4ab figl1	555	P3ID47	C37	0.6_23d	4065_BV	0.189687539520116	0.71162299778466	74.5122247944524	49
Full Hybrid recq4ab figl1	556	P3ID47	B63	0.6_23d	4065_BW	0.205955476493023	0.622502153059726	74.5993220285054	46
Full Hybrid recq4ab figl1	562	P3ID47	A74	0.6_23d	4065_CC	0.209195458185452	0.580674760022586	76.7341274493498	47
Full Hybrid recq4ab figl1	563	P3ID47	B58	0.6_23d	4065_CD	0.228513645090223	0.599788880212998	77.2354618545495	49
Full Hybrid recq4ab figl1	564	P3ID47	A95	0.6_23d	4065_CE	0.180181526361556	0.714210865467422	74.8811465144428	49
Full Hybrid recq4ab figl1	565	P3ID47	C37	0.6_23d	4065_CF	0.193178478852933	0.624557736976312	75.7314933797416	46
Full Hybrid recq4ab figl1	566	P3ID47	B63	0.6_23d	4065_CG	0.214848656824062	0.654918844223294	76.6779026136242	48
Full Hybrid recq4ab figl1	573	P3ID47	B58	0.6_23d	4065_CN	0.222567420589815	0.603313791637788	76.4981015337816	48
Full Hybrid recq4ab figl1	574	P3ID47	A95	0.6_23d	4065_CO	0.218568882891024	0.5569072511807	77.3747548152182	48
Full Hybrid recq4ab figl1	575	P3ID47	C37	0.6_23d	4065_CP	0.213719181690178	0.623156528235337	77.5442401765147	46
Full Hybrid recq4ab figl1	576	P3ID47	B63	0.6_23d	4065_CQ	0.225639145073248	0.580750328154095	76.7854183844575	49
Full Hybrid recq4ab figl1	582	P3ID47	A74	0.6_23d	4066_E	0.206896245192819	0.587169655259219	77.9319271952533	51
Full Hybrid recq4ab figl1	583	P3ID47	B58	0.6_23d	4066_F	0.220743243773823	0.678989800008908	77.5518237136258	49
Full Hybrid recq4ab figl1	584	P3ID47	A95	0.6_23d	4066_G	0.198913518248327	0.592743474437051	77.6888587887003	46
Full Hybrid recq4ab figl1	585	P3ID47	C37	0.6_23d	4066_H	0.215551944888982	0.661491943437805	77.8290640508042	55
Full Hybrid recq4ab figl1	586	P3ID47	B63	0.6_23d	4066_I	0.221748001336047	0.625434263497728	76.7113704968976	49
Full Hybrid recq4ab figl1	592	P3ID47	A74	0.6_23d	4066_O	0.14605461204879	0.665418912623944	73.9089623517041	48
Full Hybrid recq4ab figl1	593	P3ID47	B58	0.6_23d	4066_P	0.220402322088338	0.512283448602131	76.2915123388558	51
Full Hybrid recq4ab figl1	594	P3ID47	A95	0.6_23d	4066_Q	0.214379353473735	0.637109275524313	76.5553479125698	49
Full Hybrid recq4ab figl1	595	P3ID47	C37	0.6_23d	4066_R	0.193339888237181	0.664131804061496	75.4381134421754	49
Full Hybrid recq4ab figl1	596	P3ID47	B63	0.6_23d	4066_S	0.233771294626365	0.626721030178046	76.2429335107781	48
Full Hybrid recq4ab figl1	602	P3ID47	A74	0.6_23d	4066_Y	0.219219951505385	0.618897147796024	77.806418537179	51
Full Hybrid recq4ab figl1	603	P3ID47	B58	0.6_23d	4066_Z	0.237794064163178	0.615747315444602	76.0288906960757	50
Full Hybrid recq4ab figl1	604	P3ID47	A95	0.6_23d	4066_AA	0.202263397161462	0.6391322657007	76.6737353975424	50
Full Hybrid recq4ab figl1	605	P3ID47	C37	0.6_23d	4066_AB	0.203702042383798	0.578002109245107	78.5316025079947	49
Full Hybrid recq4ab figl1	606	P3ID47	B63	0.6_23d	4066_AC	0.219327480397831	0.716379253276844	77.3411919600833	52
Full Hybrid recq4ab figl1	612	P3ID47	A74	0.6_23d	4066_AI	0.214502211901939	0.596854833055985	77.9976303482982	48
Full Hybrid recq4ab figl1	613	P3ID47	B58	0.6_23d	4066_AJ	0.219956807270696	0.582065818584071	76.2845925794431	48
Full Hybrid recq4ab figl1	614	P3ID47	A95	0.6_23d	4066_AK	0.213749237583394	0.662034298144725	77.7263532034421	52
Full Hybrid recq4ab figl1	615	P3ID47	C37	0.6_23d	4066_AL	0.217826026041068	0.590185577547566	76.9246445397149	45
Full Hybrid recq4ab figl1	616	P3ID47	B63	0.6_23d	4066_AM	0.228965260252465	0.620583220449782	76.731139563248	48
Full Hybrid recq4ab figl1	622	P3ID47	A74	0.6_23d	4066_AS	0.216886468886673	0.742867493216818	77.7096453394809	50
Full Hybrid recq4ab figl1	623	P3ID47	B58	0.6_23d	4066_AT	0.200130672686679	0.597309362143066	74.8338624113738	49
Full Hybrid recq4ab figl1	624	P3ID47	A95	0.6_23d	4066_AU	0.217268880966482	0.556007181243445	77.5860518329268	48
Full Hybrid recq4ab figl1	625	P3ID47	C37	0.6_23d	4066_AV	0.211930671422424	0.624494117613255	76.336126493956	48
Full Hybrid recq4ab figl1	626	P3ID47	B63	0.6_23d	4066_AW	0.224610228525601	0.746516927963654	77.6082888686833	50
Full Hybrid recq4ab figl1	632	P3ID47	A74	0.6_23d	4066_BC	0.215395980984849	0.690604341114532	77.0957511614247	49
Full Hybrid recq4ab figl1	633	P3ID47	B58	0.6_23d	4066_BD	0.222146693847162	0.569874598936425	76.9651597041877	46
Full Hybrid recq4ab figl1	634	P3ID47	A95	0.6_23d	4066_BE	0.215374899283247	0.601178031638898	77.3517542660974	49
Full Hybrid recq4ab figl1	635	P3ID47	C37	0.6_23d	4066_BF	0.211876317867574	0.595538085211681	77.6805808284269	49
Full Hybrid recq4ab figl1	636	P3ID47	B63	0.6_23d	4066_BG	0.235765321851112	0.591546224769499	75.8650779345321	49
Full Hybrid recq4ab figl1	642	P3ID47	A74	0.6_23d	4066_BM	0.218137135012931	0.597668358687077	77.6725484624335	49
Full Hybrid recq4ab figl1	643	P3ID47	B58	0.6_23d	4066_BN	0.221216850122577	0.551385641909699	76.442383330013	48
Full Hybrid recq4ab figl1	644	P3ID47	A95	0.6_23d	4066_BO	0.223359180439262	0.609944193738073	76.8787307917992	47
Full Hybrid recq4ab figl1	645	P3ID47	C37	0.6_23d	4066_BP	0.211458450082873	0.581227906546897	77.6983508464726	47
Full Hybrid recq4ab figl1	646	P3ID47	B63	0.6_23d	4066_BQ	0.225490559510324	0.619999495535489	76.7754650309927	49
Full Hybrid recq4ab figl1	652	P3ID47	A74	0.6_23d	4066_BW	0.222317981935818	0.617163680785974	76.9112849819021	49
Full Hybrid recq4ab figl1	653	P3ID47	B58	0.6_23d	4066_BX	0.208978667528982	0.665179621302281	77.4289654030431	50
Full Hybrid recq4ab figl1	655	P3ID47	C37	0.6_23d	4066_BZ	0.200714927972639	0.617603480767595	76.1848564601426	49
Full Hybrid recq4ab figl1	663	P3ID47	B58	0.6_23d	4066_CH	0.230457815667339	0.591385157289266	75.8122831175182	48
Full Hybrid recq4ab figl1	666	P3ID47	B63	0.6_23d	4066_CK	0.221680493241415	0.572841594266211	77.2672060914988	51
Full Hybrid recq4ab figl1	672	P3ID47	A74	0.6_23d	4066_CQ	0.220979865515769	0.637296041707076	77.3932747992541	49
Full Hybrid recq4ab figl1	674	P3ID47	A95	0.6_23d	4067_A	0.226022602627779	0.596222494782704	77.6610097756028	49
Full Hybrid recq4ab figl1	675	P3ID47	C37	0.6_23d	4067_B	0.1998198200931	0.627933161109203	75.1850309395133	48
Full Hybrid recq4ab figl1	676	P3ID47	B63	0.6_23d	4067_C	0.174761774104684	0.730492123580413	72.4923744323188	47
Full Hybrid recq4ab figl1	681	P3ID47	NA	0.6_23d	4067_I	0.214871472307433	0.749332827420477	75.3605248785383	49
Full Hybrid recq4ab figl1	684	P3ID47	A95	0.6_23d	4067_K	0.197381145765829	0.623309452103481	77.4744312724861	50
Full Hybrid recq4ab figl1	685	P3ID47	C37	0.6_23d	4067_L	0.210086173477636	0.534285622286996	78.2739154433845	49
Full Hybrid recq4ab figl1	686	P3ID47	B63	0.6_23d	4067_M	0.221022918635175	0.699672435039971	77.5792843415342	49
Full Hybrid recq4ab figl1	692	P3ID47	A74	0.6_23d	4067_S	0.190061926614909	0.649158812465578	74.7098376382739	47
Full Hybrid recq4ab figl1	693	P3ID47	B58	0.6_23d	4067_T	0.227846490570803	0.571118314685371	77.2726289596158	49
Full Hybrid recq4ab figl1	694	P3ID47	A95	0.6_23d	4067_U	0.171270798844009	0.756498320237666	76.1096216957299	47
Full Hybrid recq4ab figl1	695	P3ID47	C37	0.6_23d	4067_V	0.217735458177396	0.595613324293187	76.7334537000103	47
Full Hybrid recq4ab figl1	696	P3ID47	B63	0.6_23d	4067_W	0.232106071118337	0.587246701566635	77.0135578901931	49
Full Hybrid recq4ab figl1	702	P3ID47	A74	0.6_23d	4067_AC	0.227343246856849	0.615605905765277	77.2676409279959	49
Full Hybrid recq4ab figl1	703	P3ID47	B58	0.6_23d	4067_AD	0.209240624712241	0.644918085727416	76.0272622299829	50
Full Hybrid recq4ab figl1	704	P3ID47	A95	0.6_23d	4067_AE	0.194698918926229	0.744679315265493	74.7036681993983	50
Full Hybrid recq4ab figl1	705	P3ID47	C37	0.6_23d	4067_AF	0.199840680002038	0.531297022281629	78.4244007237787	49
Full Hybrid recq4ab figl1	712	P3ID47	A74	0.6_23d	4067_AM	0.211155841724334	0.565095118827475	77.8504365094173	49
Full Hybrid recq4ab figl1	714	P3ID47	A95	0.6_23d	4067_AO	0.212134749145035	0.593258129634298	78.3603525000618	47
Full Hybrid recq4ab figl1	715	P3ID47	C37	0.6_23d	4067_AP	0.199630694883819	0.593626479858941	78.7769328523296	48

## Sheet: CSL_chr2_L WT
Population	ID_Pot_Pheno	ID_Manip_Pheno	Line	Treatment	ID_Geno	Relative Expansion Rate RER18-31 [no unit]	Compactness 31DAS [no unit]	Hue 31DAS [no unit]	Bolting_time [DAS]
CSL_chr2_L_WT	3	P3ID62	SL2_WT_6	0.6_23d	4807_A	0.227280663161365	0.684634931619188	76.0444820725564	52
CSL_chr2_L_WT	4	P3ID62	SL2_WT_6	0.6_23d	4807_B	0.226547224753953	0.672726770878378	76.0277347148463	50
CSL_chr2_L_WT	5	P3ID62	SL2_WT_60	0.6_23d	4807_C	0.20329743537977	0.668349922648063	75.7930973600408	50
CSL_chr2_L_WT	6	P3ID62	SL2_WT_60	0.6_23d	4807_D	0.202586748337625	0.670733671970078	75.4068452073753	48
CSL_chr2_L_WT	7	P3ID62	SL2_WT_11	0.6_23d	4807_E	0.217126326140525	0.815593846346464	74.3981630926539	52
CSL_chr2_L_WT	8	P3ID62	SL2_WT_11	0.6_23d	4807_F	0.186473195765031	0.720531209425133	72.4704663969456	50
CSL_chr2_L_WT	15	P3ID62	SL2_WT_6	0.6_23d	4807_M	0.223898518254736	0.656575834574608	76.1616464128394	50
CSL_chr2_L_WT	16	P3ID62	SL2_WT_6	0.6_23d	4807_N	0.223623405165275	0.660336805163335	76.1023880981887	47
CSL_chr2_L_WT	18	P3ID62	SL2_WT_60	0.6_23d	4807_P	0.220993025610676	0.753968988124834	76.2349324229789	50
CSL_chr2_L_WT	19	P3ID62	SL2_WT_11	0.6_23d	4807_Q	0.199463898550927	0.702331719518464	73.9883732379819	50
CSL_chr2_L_WT	20	P3ID62	SL2_WT_11	0.6_23d	4807_R	0.210651731489901	0.681311429756294	73.824775438196	49
CSL_chr2_L_WT	27	P3ID62	SL2_WT_6	0.6_23d	4807_Y	0.222179826990897	0.675976892009339	76.277668154752	49
CSL_chr2_L_WT	28	P3ID62	SL2_WT_6	0.6_23d	4807_Z	0.217052778336731	0.732535380303018	75.7079058436495	47
CSL_chr2_L_WT	29	P3ID62	SL2_WT_60	0.6_23d	4807_AA	0.219299596032352	0.675868227141423	75.9158640686267	46
CSL_chr2_L_WT	30	P3ID62	SL2_WT_60	0.6_23d	4807_AB	0.222336992053435	0.658041582535461	75.211561582388	49
CSL_chr2_L_WT	31	P3ID62	SL2_WT_11	0.6_23d	4807_AC	0.212040224754678	0.666019955654102	73.5127179875638	51
CSL_chr2_L_WT	32	P3ID62	SL2_WT_11	0.6_23d	4807_AD	0.203384958673861	0.767138400436389	74.2187415752187	52
CSL_chr2_L_WT	39	P3ID62	SL2_WT_6	0.6_23d	4807_AK	0.217224334070612	0.717705893031579	77.1337530729319	51
CSL_chr2_L_WT	40	P3ID62	SL2_WT_6	0.6_23d	4807_AL	0.20298683983896	0.669094143189725	75.8816688421292	47
CSL_chr2_L_WT	41	P3ID62	SL2_WT_60	0.6_23d	4807_AM	0.216843136969636	0.647282935632645	76.6812396714538	49
CSL_chr2_L_WT	42	P3ID62	SL2_WT_60	0.6_23d	4807_AN	0.232817046800822	0.623661009946349	75.6745553916331	49
CSL_chr2_L_WT	43	P3ID62	SL2_WT_11	0.6_23d	4807_AO	0.200576180961304	0.71045830604336	74.3319864006605	49
CSL_chr2_L_WT	51	P3ID62	SL2_WT_6	0.6_23d	4807_AW	0.219419461997228	0.720692455630302	76.2874972271714	51
CSL_chr2_L_WT	52	P3ID62	SL2_WT_6	0.6_23d	4807_AX	0.196826739679621	0.781160931819429	74.8181070140267	48
CSL_chr2_L_WT	53	P3ID62	SL2_WT_60	0.6_23d	4807_AY	0.21215273220295	0.759806440689043	73.854841836548	47
CSL_chr2_L_WT	54	P3ID62	SL2_WT_60	0.6_23d	4807_AZ	0.218374500927113	0.686941615605811	76.1419023533627	48
CSL_chr2_L_WT	55	P3ID62	SL2_WT_11	0.6_23d	4807_BA	0.205802732460334	0.700709732064861	74.1761610636633	49
CSL_chr2_L_WT	56	P3ID62	SL2_WT_11	0.6_23d	4807_BB	0.211364173271974	0.727852421404005	74.0830668065734	49
CSL_chr2_L_WT	63	P3ID62	SL2_WT_6	0.6_23d	4807_BI	0.223457826468306	0.66980569156552	76.0812794088572	48
CSL_chr2_L_WT	64	P3ID62	SL2_WT_6	0.6_23d	4807_BJ	0.207455732709707	0.740105601539588	74.3382430089247	49
CSL_chr2_L_WT	65	P3ID62	SL2_WT_60	0.6_23d	4807_BK	0.219820474474568	0.646667469962475	76.2644151279668	49
CSL_chr2_L_WT	66	P3ID62	SL2_WT_60	0.6_23d	4807_BL	0.210248912598947	0.693013629729797	76.6342821650992	52
CSL_chr2_L_WT	67	P3ID62	SL2_WT_11	0.6_23d	4807_BM	0.204206804281631	0.68329443755881	74.1591910409113	50
CSL_chr2_L_WT	68	P3ID62	SL2_WT_11	0.6_23d	4807_BN	0.21750463603726	0.697108759348702	73.9365849791334	50
CSL_chr2_L_WT	75	P3ID62	SL2_WT_6	0.6_23d	4807_BU	0.226332965216622	0.706366250263974	76.461728210106	49
CSL_chr2_L_WT	77	P3ID62	SL2_WT_60	0.6_23d	4807_BW	0.213089590810546	0.701641668545039	76.9489522956194	50
CSL_chr2_L_WT	78	P3ID62	SL2_WT_60	0.6_23d	4807_BX	0.228388547994345	0.654085188712103	75.1358989913692	45
CSL_chr2_L_WT	79	P3ID62	SL2_WT_11	0.6_23d	4807_BY	0.20000696902799	0.732947042365411	73.9211894607598	49
CSL_chr2_L_WT	80	P3ID62	SL2_WT_11	0.6_23d	4807_BZ	0.200256463122471	0.688539405627416	74.4391198188029	49
CSL_chr2_L_WT	87	P3ID62	SL2_WT_6	0.6_23d	4807_CG	0.227219095533173	0.679731945533614	76.1751754357545	50
CSL_chr2_L_WT	88	P3ID62	SL2_WT_6	0.6_23d	4807_CH	0.213871163678526	0.72404662617472	76.1709833987825	49
CSL_chr2_L_WT	89	P3ID62	SL2_WT_60	0.6_23d	4807_CI	0.22656359480152	0.714247296797161	76.195535312426	50
CSL_chr2_L_WT	91	P3ID62	SL2_WT_11	0.6_23d	4807_CK	0.191477496499428	0.735554160956638	74.3115762244474	53
CSL_chr2_L_WT	92	P3ID62	SL2_WT_11	0.6_23d	4807_CL	0.213081554774203	0.702740591557082	73.8618083012737	50
CSL_chr2_L_WT	99	P3ID62	SL2_WT_6	0.6_23d	4808_A	0.225294677933206	0.672318567901077	75.5477199971913	48
CSL_chr2_L_WT	100	P3ID62	SL2_WT_6	0.6_23d	4808_B	0.223428140748312	0.660947880410197	76.1538456839021	50
CSL_chr2_L_WT	101	P3ID62	SL2_WT_60	0.6_23d	4808_C	0.228482232326222	0.620742570322865	75.9848357385498	50
CSL_chr2_L_WT	102	P3ID62	SL2_WT_60	0.6_23d	4808_D	0.221114262021746	0.642037111200107	76.2554533465735	49
CSL_chr2_L_WT	103	P3ID62	SL2_WT_11	0.6_23d	4808_E	0.20012018053861	0.839318983188009	74.532514249291	51
CSL_chr2_L_WT	104	P3ID62	SL2_WT_11	0.6_23d	4808_F	0.207926157131781	0.656978952365881	73.3833473581721	49
CSL_chr2_L_WT	111	P3ID62	SL2_WT_6	0.6_23d	4808_M	0.214945632927511	0.715149914682701	76.7408197241295	51
CSL_chr2_L_WT	112	P3ID62	SL2_WT_6	0.6_23d	4808_N	0.237320177969761	0.693973689518388	75.6388780561403	50
CSL_chr2_L_WT	113	P3ID62	SL2_WT_60	0.6_23d	4808_O	0.213486281178254	0.638482926866226	75.7030383781732	46
CSL_chr2_L_WT	114	P3ID62	SL2_WT_60	0.6_23d	4808_P	0.225129297852295	0.667700254804968	75.6721269322645	49
CSL_chr2_L_WT	115	P3ID62	SL2_WT_11	0.6_23d	4808_Q	0.209631106697165	0.686311665427985	73.4204710501647	51
CSL_chr2_L_WT	116	P3ID62	SL2_WT_11	0.6_23d	4808_R	0.188342489105201	0.729263618943334	72.606851580641	51
CSL_chr2_L_WT	123	P3ID62	SL2_WT_6	0.6_23d	4808_Y	0.214981363237929	0.750030987269523	76.1195695744323	49
CSL_chr2_L_WT	124	P3ID62	SL2_WT_6	0.6_23d	4808_Z	0.223621758866085	0.683126456292559	76.8435912024194	50
CSL_chr2_L_WT	125	P3ID62	SL2_WT_60	0.6_23d	4808_AA	0.213928571298903	0.692850234418544	76.8674526968854	50
CSL_chr2_L_WT	126	P3ID62	SL2_WT_60	0.6_23d	4808_AB	0.18107941526284	0.70586583244268	74.8800895319189	47
CSL_chr2_L_WT	127	P3ID62	SL2_WT_11	0.6_23d	4808_AC	0.209217753213565	0.707372961315541	73.8833577162587	49
CSL_chr2_L_WT	128	P3ID62	SL2_WT_11	0.6_23d	4808_AD	0.209533847821082	0.686143585907221	74.0205777218551	49
CSL_chr2_L_WT	135	P3ID62	SL2_WT_6	0.6_23d	4808_AK	0.232457227604218	0.667189102640051	75.5620439759525	46
CSL_chr2_L_WT	136	P3ID62	SL2_WT_6	0.6_23d	4808_AL	0.216836355646098	0.724832186626081	76.3957222424191	49
CSL_chr2_L_WT	137	P3ID62	SL2_WT_60	0.6_23d	4808_AM	0.215729545332334	0.702797666176206	73.5769989623323	45
CSL_chr2_L_WT	138	P3ID62	SL2_WT_60	0.6_23d	4808_AN	0.222245011376214	0.625627426839663	76.0105455352933	49
CSL_chr2_L_WT	140	P3ID62	SL2_WT_11	0.6_23d	4808_AP	0.196291188146328	0.693445402116737	74.7236128417425	49
CSL_chr2_L_WT	147	P3ID62	SL2_WT_6	0.6_23d	4808_AW	0.225418540529284	0.741087298264462	76.5381902496492	50
CSL_chr2_L_WT	148	P3ID62	SL2_WT_6	0.6_23d	4808_AX	0.217669904365469	0.623535039464243	75.9007065714915	48
CSL_chr2_L_WT	149	P3ID62	SL2_WT_60	0.6_23d	4808_AY	0.227456915794501	0.664666862371199	76.3782950949521	45
CSL_chr2_L_WT	150	P3ID62	SL2_WT_60	0.6_23d	4808_AZ	0.216761737450115	0.611140336060102	76.3515885438937	50
CSL_chr2_L_WT	151	P3ID62	SL2_WT_11	0.6_23d	4808_BA	0.206887413320571	0.687767047117354	74.2614753679595	49
CSL_chr2_L_WT	152	P3ID62	SL2_WT_11	0.6_23d	4808_BB	0.204006782943072	0.695489693157971	73.8986542095607	49
CSL_chr2_L_WT	159	P3ID62	SL2_WT_6	0.6_23d	4808_BI	0.20351931398422	0.751242446116576	74.3081926641291	49
CSL_chr2_L_WT	160	P3ID62	SL2_WT_6	0.6_23d	4808_BJ	0.20741526027587	0.718397418047499	74.1018743412153	48
CSL_chr2_L_WT	161	P3ID62	SL2_WT_60	0.6_23d	4808_BK	0.215756939176054	0.711445615579089	76.6335749527429	49
CSL_chr2_L_WT	162	P3ID62	SL2_WT_60	0.6_23d	4808_BL	0.225017569160837	0.692955095924306	75.9722129910445	47
CSL_chr2_L_WT	163	P3ID62	SL2_WT_11	0.6_23d	4808_BM	0.199237884326095	0.833679988114693	72.8098360474428	50
CSL_chr2_L_WT	164	P3ID62	SL2_WT_11	0.6_23d	4808_BN	0.225323605875991	0.719316411353146	72.9340936709386	49
CSL_chr2_L_WT	171	P3ID62	SL2_WT_6	0.6_23d	4808_BU	0.223493394338016	0.679626468573152	76.2834247503654	48
CSL_chr2_L_WT	173	P3ID62	SL2_WT_60	0.6_23d	4808_BW	0.230803135454059	0.701502544086234	75.7722706611716	46
CSL_chr2_L_WT	174	P3ID62	SL2_WT_60	0.6_23d	4808_BX	0.229275811280133	0.651217614266944	76.0941229396549	49
CSL_chr2_L_WT	175	P3ID62	SL2_WT_11	0.6_23d	4808_BY	0.209909948491298	0.657721120901602	74.3691208594613	49
CSL_chr2_L_WT	176	P3ID62	SL2_WT_11	0.6_23d	4808_BZ	0.210796090355858	0.692178311418855	74.1130834544751	49
CSL_chr2_L_WT	183	P3ID62	SL2_WT_6	0.6_23d	4808_CG	0.235288317211465	0.71741706032352	75.856400765654	47
CSL_chr2_L_WT	184	P3ID62	SL2_WT_6	0.6_23d	4808_CH	0.197341910533938	0.731960102581239	74.5372004558743	45
CSL_chr2_L_WT	185	P3ID62	SL2_WT_60	0.6_23d	4808_CI	0.222341622484153	0.724376960451634	73.5555107874706	48
CSL_chr2_L_WT	186	P3ID62	SL2_WT_60	0.6_23d	4808_CJ	0.227472198432959	0.668780750988461	76.0988068629398	49
CSL_chr2_L_WT	187	P3ID62	SL2_WT_11	0.6_23d	4808_CK	0.20675919307154	0.692419239981873	74.4744831406906	49
CSL_chr2_L_WT	188	P3ID62	SL2_WT_11	0.6_23d	4808_CL	0.211772878376496	0.742096214924677	72.1401841540878	49
CSL_chr2_L_WT	195	P3ID62	SL2_WT_6	0.6_23d	4809_A	0.224077599609475	0.621651420110479	75.6870747738302	49
CSL_chr2_L_WT	196	P3ID62	SL2_WT_6	0.6_23d	4809_B	0.226373498548488	0.641561702214142	76.3883271284409	49
CSL_chr2_L_WT	197	P3ID62	SL2_WT_60	0.6_23d	4809_C	0.223458553282891	0.70767786599914	76.1878387954172	49
CSL_chr2_L_WT	198	P3ID62	SL2_WT_60	0.6_23d	4809_D	0.228856979457348	0.69001178002356	75.8304460813769	50
CSL_chr2_L_WT	199	P3ID62	SL2_WT_11	0.6_23d	4809_E	0.176729551812992	0.775834460671986	74.2412441773957	52
CSL_chr2_L_WT	200	P3ID62	SL2_WT_11	0.6_23d	4809_F	0.203776333819234	0.828500055453744	74.9158875842531	50
CSL_chr2_L_WT	207	P3ID62	SL2_WT_6	0.6_23d	4809_M	0.20330986286258	0.811229537416437	74.2498851224102	48
CSL_chr2_L_WT	208	P3ID62	SL2_WT_6	0.6_23d	4809_N	0.197491955575866	0.7147385751245	75.4235128714638	48
CSL_chr2_L_WT	209	P3ID62	SL2_WT_60	0.6_23d	4809_O	0.221802002001715	0.61028292204954	76.0399163276579	49
CSL_chr2_L_WT	210	P3ID62	SL2_WT_60	0.6_23d	4809_P	0.202276088966365	0.844742245205701	74.5648526190402	50
CSL_chr2_L_WT	211	P3ID62	SL2_WT_11	0.6_23d	4809_Q	0.216389482224179	0.709924054778817	73.6684109174856	48
CSL_chr2_L_WT	212	P3ID62	SL2_WT_11	0.6_23d	4809_R	0.199593855979834	0.765548078225916	75.0295633938709	50
CSL_chr2_L_WT	219	P3ID62	SL2_WT_6	0.6_23d	4809_Y	0.206883949823765	0.817797036703272	74.7417586851799	49
CSL_chr2_L_WT	220	P3ID62	SL2_WT_6	0.6_23d	4809_Z	0.219980474777594	0.676119719670267	76.5765618014149	49
CSL_chr2_L_WT	221	P3ID62	SL2_WT_60	0.6_23d	4809_AA	0.235138615154157	0.658934524016931	75.5822174441824	49
CSL_chr2_L_WT	222	P3ID62	SL2_WT_60	0.6_23d	4809_AB	0.235200522526276	0.673928659206422	75.8280656644336	45
CSL_chr2_L_WT	223	P3ID62	SL2_WT_11	0.6_23d	4809_AC	0.204477845943142	0.735041581619743	74.2510384163597	49
CSL_chr2_L_WT	224	P3ID62	SL2_WT_11	0.6_23d	4809_AD	0.210827688914074	0.671160857866161	74.3759147680148	49
CSL_chr2_L_WT	231	P3ID62	SL2_WT_6	0.6_23d	4809_AK	0.218544365723418	0.685500020716229	75.9766387118451	50
CSL_chr2_L_WT	232	P3ID62	SL2_WT_6	0.6_23d	4809_AL	0.233710244278332	0.681506885177234	75.475086529386	48
CSL_chr2_L_WT	233	P3ID62	SL2_WT_60	0.6_23d	4809_AM	0.219915609879513	0.699169369317787	76.1555318332784	46
CSL_chr2_L_WT	234	P3ID62	SL2_WT_60	0.6_23d	4809_AN	0.217580654044041	0.704649348608186	76.6464752303591	NA
CSL_chr2_L_WT	235	P3ID62	SL2_WT_11	0.6_23d	4809_AO	0.215006137267819	0.709543943744771	74.0042631697269	49
CSL_chr2_L_WT	236	P3ID62	SL2_WT_11	0.6_23d	4809_AP	0.213259524276719	0.689890501923188	74.3283414286479	49
CSL_chr2_L_WT	243	P3ID62	SL2_WT_6	0.6_23d	4809_AW	0.218923953801249	0.634950333639547	76.4036545671112	51
CSL_chr2_L_WT	244	P3ID62	SL2_WT_6	0.6_23d	4809_AX	0.222731467971679	0.683370144248399	77.0077034144542	50
CSL_chr2_L_WT	245	P3ID62	SL2_WT_60	0.6_23d	4809_AY	0.210101698380444	0.718197786383933	74.2396295592844	47
CSL_chr2_L_WT	246	P3ID62	SL2_WT_60	0.6_23d	4809_AZ	0.21933833710987	0.640616258225593	76.2004742811734	46
CSL_chr2_L_WT	247	P3ID62	SL2_WT_11	0.6_23d	4809_BA	0.198020438765941	0.716316141655585	73.8508402202907	49
CSL_chr2_L_WT	248	P3ID62	SL2_WT_11	0.6_23d	4809_BB	0.208104701616588	0.677799405179292	74.6258820096909	49
CSL_chr2_L_WT	255	P3ID62	SL2_WT_6	0.6_23d	4809_BI	0.221823569376303	0.75527140964346	76.4739212770027	50
CSL_chr2_L_WT	256	P3ID62	SL2_WT_6	0.6_23d	4809_BJ	0.215771355057496	0.686392334395745	76.3070813547241	47
CSL_chr2_L_WT	257	P3ID62	SL2_WT_60	0.6_23d	4809_BK	0.206641042628052	0.684446008445606	77.0048161814554	50
CSL_chr2_L_WT	258	P3ID62	SL2_WT_60	0.6_23d	4809_BL	0.222713160276795	0.647576125788908	76.5904628656237	50
CSL_chr2_L_WT	259	P3ID62	SL2_WT_11	0.6_23d	4809_BM	0.205816514842729	0.671203884854201	74.6327012189191	49
CSL_chr2_L_WT	260	P3ID62	SL2_WT_11	0.6_23d	4809_BN	0.202016823608094	0.810778726385833	74.3814281607813	50
CSL_chr2_L_WT	267	P3ID62	SL2_WT_6	0.6_23d	4809_BU	0.2249702777266	0.674771274202928	76.439712192178	48
CSL_chr2_L_WT	269	P3ID62	SL2_WT_60	0.6_23d	4809_BW	0.223872358482646	0.612622129224954	75.8889902103915	48
CSL_chr2_L_WT	270	P3ID62	SL2_WT_60	0.6_23d	4809_BX	0.224615046775161	0.65125586867849	75.9640307326347	47
CSL_chr2_L_WT	271	P3ID62	SL2_WT_11	0.6_23d	4809_BY	0.205725977629452	0.607812762462905	73.4307632814755	49
CSL_chr2_L_WT	272	P3ID62	SL2_WT_11	0.6_23d	4809_BZ	0.206069643573136	0.688015603697917	75.0460075505945	48
CSL_chr2_L_WT	279	P3ID62	SL2_WT_6	0.6_23d	4809_CG	0.229885532256878	0.661232928343384	76.1622101874957	44
CSL_chr2_L_WT	280	P3ID62	SL2_WT_6	0.6_23d	4809_CH	0.214893388466116	0.705037073176266	74.4006704821894	48
CSL_chr2_L_WT	281	P3ID62	SL2_WT_60	0.6_23d	4809_CI	0.228330516717635	0.633003147514235	76.3889081660595	47
CSL_chr2_L_WT	282	P3ID62	SL2_WT_60	0.6_23d	4809_CJ	0.215248116108959	0.729661124508186	77.1405365096674	49
CSL_chr2_L_WT	283	P3ID62	SL2_WT_11	0.6_23d	4809_CK	0.206189045302522	0.732420104015036	74.3441394194883	NA
CSL_chr2_L_WT	284	P3ID62	SL2_WT_11	0.6_23d	4809_CL	0.20675567221648	0.696055146462087	74.2340522416435	NA
CSL_chr2_L_WT	291	P3ID62	SL2_WT_6	0.6_23d	4810_A	0.21980965835241	0.66231973714159	76.3466163297183	48
CSL_chr2_L_WT	292	P3ID62	SL2_WT_6	0.6_23d	4810_B	0.230585699697825	0.657603526105563	75.8757684794859	45
CSL_chr2_L_WT	293	P3ID62	SL2_WT_60	0.6_23d	4810_C	0.220025864699624	0.625181952667107	76.5760700026589	49
CSL_chr2_L_WT	294	P3ID62	SL2_WT_60	0.6_23d	4810_D	0.229454543900744	0.646512420329762	76.188693937652	45
CSL_chr2_L_WT	295	P3ID62	SL2_WT_11	0.6_23d	4810_E	0.220412266031994	0.681455407072268	73.7414274627192	49
CSL_chr2_L_WT	296	P3ID62	SL2_WT_11	0.6_23d	4810_F	0.213899678649342	0.729038548072596	73.9544727165803	48
CSL_chr2_L_WT	303	P3ID62	SL2_WT_6	0.6_23d	4810_M	0.226979089943269	0.621090659704128	76.4833939962364	48
CSL_chr2_L_WT	304	P3ID62	SL2_WT_6	0.6_23d	4810_N	0.21856555357623	0.728738000349999	76.8299980572599	49
CSL_chr2_L_WT	305	P3ID62	SL2_WT_60	0.6_23d	4810_O	0.227569168905861	0.710153223861427	76.1934365312752	46
CSL_chr2_L_WT	306	P3ID62	SL2_WT_60	0.6_23d	4810_P	0.218144727151934	0.678987776367433	77.3397271892269	49
CSL_chr2_L_WT	307	P3ID62	SL2_WT_11	0.6_23d	4810_Q	0.222709702120526	0.749483238002742	73.9470847661288	48
CSL_chr2_L_WT	308	P3ID62	SL2_WT_11	0.6_23d	4810_R	0.213758358256005	0.644433760216793	73.7007955308811	48
CSL_chr2_L_WT	315	P3ID62	SL2_WT_6	0.6_23d	4810_Y	0.226945485019705	0.64865666249307	77.0074616006405	49
CSL_chr2_L_WT	316	P3ID62	SL2_WT_6	0.6_23d	4810_Z	0.239762003874425	0.714481081194421	75.8733791310577	48
CSL_chr2_L_WT	317	P3ID62	SL2_WT_60	0.6_23d	4810_AA	0.231168050971347	0.706532382600432	76.1513945158413	46
CSL_chr2_L_WT	318	P3ID62	SL2_WT_60	0.6_23d	4810_AB	0.228125252970341	0.738092578959245	76.6869440013517	51
CSL_chr2_L_WT	319	P3ID62	SL2_WT_11	0.6_23d	4810_AC	0.207936436545705	0.699244462136656	74.184336762307	49
CSL_chr2_L_WT	320	P3ID62	SL2_WT_11	0.6_23d	4810_AD	0.200295895087933	0.683131463766535	74.0669146359094	48
CSL_chr2_L_WT	327	P3ID62	SL2_WT_6	0.6_23d	4810_AK	0.215797022686895	0.613715780803333	76.2344744690193	49
CSL_chr2_L_WT	328	P3ID62	SL2_WT_6	0.6_23d	4810_AL	0.23599000842006	0.687601270189427	75.7607948350482	47
CSL_chr2_L_WT	329	P3ID62	SL2_WT_60	0.6_23d	4810_AM	0.227390814542771	0.661268671423844	76.273245273087	50
CSL_chr2_L_WT	330	P3ID62	SL2_WT_60	0.6_23d	4810_AN	0.212483048228805	0.74424774056353	73.9596158786276	46
CSL_chr2_L_WT	331	P3ID62	SL2_WT_11	0.6_23d	4810_AO	0.208755055322208	0.832825461743418	74.8501613769061	50
CSL_chr2_L_WT	332	P3ID62	SL2_WT_11	0.6_23d	4810_AP	0.207689963875229	0.805395611032817	74.5662060295792	51
CSL_chr2_L_WT	339	P3ID62	SL2_WT_6	0.6_23d	4810_AW	0.21816490311523	0.647025580528498	76.6856819169001	53
CSL_chr2_L_WT	340	P3ID62	SL2_WT_6	0.6_23d	4810_AX	0.203351291548877	0.707397117452269	74.939053859391	48
CSL_chr2_L_WT	341	P3ID62	SL2_WT_60	0.6_23d	4810_AY	0.22525182356067	0.745507863036541	76.6493129837365	50
CSL_chr2_L_WT	342	P3ID62	SL2_WT_60	0.6_23d	4810_AZ	0.219649946843208	0.639516484102947	76.542164221611	52
CSL_chr2_L_WT	343	P3ID62	SL2_WT_11	0.6_23d	4810_BA	0.209651360550055	0.698641775584549	74.9501438867963	49
CSL_chr2_L_WT	344	P3ID62	SL2_WT_11	0.6_23d	4810_BB	0.202386202472143	0.796714985405432	73.9203436128777	50
CSL_chr2_L_WT	351	P3ID62	SL2_WT_6	0.6_23d	4810_BI	0.223898027192106	0.670452383919611	76.9395059724334	48
CSL_chr2_L_WT	352	P3ID62	SL2_WT_6	0.6_23d	4810_BJ	0.228191031625595	0.640229538544509	76.485162844855	49
CSL_chr2_L_WT	353	P3ID62	SL2_WT_60	0.6_23d	4810_BK	0.229579137923159	0.677418021948962	76.5856083149163	50
CSL_chr2_L_WT	354	P3ID62	SL2_WT_60	0.6_23d	4810_BL	0.221386846973797	0.657292099648073	76.4050428004716	46
CSL_chr2_L_WT	355	P3ID62	SL2_WT_11	0.6_23d	4810_BM	0.206531249724123	0.696835758806541	73.293700290878	50
CSL_chr2_L_WT	356	P3ID62	SL2_WT_11	0.6_23d	4810_BN	0.203212746416192	0.675130358417037	74.5010527876834	49

## Sheet: CSL_chr2_L recq4ab_figl1
Population	ID_Pot_Pheno	ID_Manip_Pheno	Line	Treatment	ID_Geno	Relative Expansion Rate RER18-31 [no unit]	Compactness 31DAS [no unit]	Hue 31DAS [no unit]	Bolting_time [DAS]
CSL_chr2_L recq4ab_figl1	9	P3ID62	SL2_Mut_53	0.6_23d	4807_G	0.188947643987935	0.82345970353571	74.6875377562987	51
CSL_chr2_L recq4ab_figl1	10	P3ID62	SL2_Mut_53	0.6_23d	4807_H	0.214766832499142	0.725303037630745	73.8473652564383	50
CSL_chr2_L recq4ab_figl1	11	P3ID62	SL2_Mut_34	0.6_23d	4807_I	0.196698538664391	0.80249860015972	75.4798520982966	51
CSL_chr2_L recq4ab_figl1	12	P3ID62	SL2_Mut_34	0.6_23d	4807_J	0.200211461996767	0.672742616033755	75.483830701682	49
CSL_chr2_L recq4ab_figl1	14	P3ID62	SL2_Mut_46	0.6_23d	4807_L	0.223333696237142	0.633867375362732	76.6532169642569	48
CSL_chr2_L recq4ab_figl1	22	P3ID62	SL2_Mut_53	0.6_23d	4807_T	0.149665211012008	0.809838157363645	71.9279380359778	49
CSL_chr2_L recq4ab_figl1	23	P3ID62	SL2_Mut_34	0.6_23d	4807_U	0.215733778383444	0.673477402591998	74.5360026312206	49
CSL_chr2_L recq4ab_figl1	24	P3ID62	SL2_Mut_34	0.6_23d	4807_V	0.209006140617723	0.762491282929827	73.5337750479147	45
CSL_chr2_L recq4ab_figl1	25	P3ID62	SL2_Mut_46	0.6_23d	4807_W	0.21530668806861	0.74647439009916	76.3881395597402	51
CSL_chr2_L recq4ab_figl1	33	P3ID62	SL2_Mut_53	0.6_23d	4807_AE	0.198234766077698	0.687709844843031	73.4258858228054	51
CSL_chr2_L recq4ab_figl1	34	P3ID62	SL2_Mut_53	0.6_23d	4807_AF	0.195350257079316	0.723160096467065	73.313942380387	51
CSL_chr2_L recq4ab_figl1	35	P3ID62	SL2_Mut_34	0.6_23d	4807_AG	0.208982104280622	0.704698762078148	74.3580696427881	49
CSL_chr2_L recq4ab_figl1	36	P3ID62	SL2_Mut_34	0.6_23d	4807_AH	0.210256192020846	0.795416703965625	74.0655661411737	48
CSL_chr2_L recq4ab_figl1	37	P3ID62	SL2_Mut_46	0.6_23d	4807_AI	0.225071046920164	0.667372789020414	76.4493535755076	49
CSL_chr2_L recq4ab_figl1	38	P3ID62	SL2_Mut_46	0.6_23d	4807_AJ	0.200377223914946	0.680152613822176	74.8611911488248	49
CSL_chr2_L recq4ab_figl1	45	P3ID62	SL2_Mut_53	0.6_23d	4807_AQ	0.205923585471733	0.740062728029188	73.8054631126257	46
CSL_chr2_L recq4ab_figl1	46	P3ID62	SL2_Mut_53	0.6_23d	4807_AR	0.20190676077331	0.730627046438756	71.5959650659931	48
CSL_chr2_L recq4ab_figl1	47	P3ID62	SL2_Mut_34	0.6_23d	4807_AS	0.199368238393362	0.792494619238566	74.4995615460007	49
CSL_chr2_L recq4ab_figl1	48	P3ID62	SL2_Mut_34	0.6_23d	4807_AT	0.208069329242729	0.811028269274779	74.0733980169058	48
CSL_chr2_L recq4ab_figl1	49	P3ID62	SL2_Mut_46	0.6_23d	4807_AU	0.212698923163043	0.673575446482001	77.0128927594704	49
CSL_chr2_L recq4ab_figl1	50	P3ID62	SL2_Mut_46	0.6_23d	4807_AV	0.215295659309889	0.658610947376979	76.7914892105857	49
CSL_chr2_L recq4ab_figl1	57	P3ID62	SL2_Mut_53	0.6_23d	4807_BC	0.212705465151228	0.709616995355212	73.9186093794672	47
CSL_chr2_L recq4ab_figl1	58	P3ID62	SL2_Mut_53	0.6_23d	4807_BD	0.223978403694919	0.681275897549988	73.3887639358229	48
CSL_chr2_L recq4ab_figl1	59	P3ID62	SL2_Mut_34	0.6_23d	4807_BE	0.21112712750355	0.722983434950579	74.351165732989	48
CSL_chr2_L recq4ab_figl1	60	P3ID62	SL2_Mut_34	0.6_23d	4807_BF	0.207512139220892	0.754950883091387	74.5154558903858	49
CSL_chr2_L recq4ab_figl1	62	P3ID62	SL2_Mut_46	0.6_23d	4807_BH	0.231302358108615	0.629546140277584	76.2313158377927	47
CSL_chr2_L recq4ab_figl1	69	P3ID62	SL2_Mut_53	0.6_23d	4807_BO	0.199706186946569	0.668231342319452	73.4784156098234	46
CSL_chr2_L recq4ab_figl1	70	P3ID62	SL2_Mut_53	0.6_23d	4807_BP	0.20819670099139	0.712350943990167	73.3165955310068	49
CSL_chr2_L recq4ab_figl1	71	P3ID62	SL2_Mut_34	0.6_23d	4807_BQ	0.204120473223142	0.731036227644333	74.901516111094	48
CSL_chr2_L recq4ab_figl1	73	P3ID62	SL2_Mut_46	0.6_23d	4807_BS	0.192732736727323	0.67705814036499	76.3172642298219	48
CSL_chr2_L recq4ab_figl1	74	P3ID62	SL2_Mut_46	0.6_23d	4807_BT	0.209607238437313	0.620295518841638	76.8364189419363	49
CSL_chr2_L recq4ab_figl1	81	P3ID62	SL2_Mut_53	0.6_23d	4807_CA	0.210455068135382	0.709775060834471	72.879195938099	49
CSL_chr2_L recq4ab_figl1	82	P3ID62	SL2_Mut_53	0.6_23d	4807_CB	0.208462964159614	0.760419379418772	72.961566212385	47
CSL_chr2_L recq4ab_figl1	83	P3ID62	SL2_Mut_34	0.6_23d	4807_CC	0.227287509531252	0.757881374954527	72.8827911088307	49
CSL_chr2_L recq4ab_figl1	84	P3ID62	SL2_Mut_34	0.6_23d	4807_CD	0.206988910517665	0.674356792019514	73.218057217936	49
CSL_chr2_L recq4ab_figl1	85	P3ID62	SL2_Mut_46	0.6_23d	4807_CE	0.220461232793901	0.663284169124877	76.3312460352339	44
CSL_chr2_L recq4ab_figl1	86	P3ID62	SL2_Mut_46	0.6_23d	4807_CF	0.212272084633241	0.695357665518645	74.4959884473204	44
CSL_chr2_L recq4ab_figl1	93	P3ID62	SL2_Mut_53	0.6_23d	4807_CM	0.196111360266288	0.69923525206352	71.875259426242	50
CSL_chr2_L recq4ab_figl1	94	P3ID62	SL2_Mut_53	0.6_23d	4807_CN	0.192292755518788	0.789131702045981	73.5704364181523	50
CSL_chr2_L recq4ab_figl1	95	P3ID62	SL2_Mut_34	0.6_23d	4807_CO	0.209961495712914	0.704838458139474	74.3584442160369	49
CSL_chr2_L recq4ab_figl1	96	P3ID62	SL2_Mut_34	0.6_23d	4807_CP	0.230828900988227	0.742598485361395	73.6191937637291	49
CSL_chr2_L recq4ab_figl1	97	P3ID62	SL2_Mut_46	0.6_23d	4807_CQ	0.20243995736417	0.695576057436183	74.1513106054711	47
CSL_chr2_L recq4ab_figl1	98	P3ID62	SL2_Mut_46	0.6_23d	4807_CR	0.218036935953996	0.645183463796478	76.7088539436834	49
CSL_chr2_L recq4ab_figl1	107	P3ID62	SL2_Mut_34	0.6_23d	4808_I	0.213270187151956	0.645941577876212	73.6673920056065	49
CSL_chr2_L recq4ab_figl1	108	P3ID62	SL2_Mut_34	0.6_23d	4808_J	0.206699467374262	0.713504557689263	73.9668690468788	48
CSL_chr2_L recq4ab_figl1	109	P3ID62	SL2_Mut_46	0.6_23d	4808_K	0.201737458641292	0.658247829518548	75.4033807528332	49
CSL_chr2_L recq4ab_figl1	110	P3ID62	SL2_Mut_46	0.6_23d	4808_L	0.217777087321764	0.75354794528729	75.98195740865	48
CSL_chr2_L recq4ab_figl1	117	P3ID62	SL2_Mut_53	0.6_23d	4808_S	0.208087119489356	0.739191909110568	72.1839104753761	49
CSL_chr2_L recq4ab_figl1	118	P3ID62	SL2_Mut_53	0.6_23d	4808_T	0.209568725208809	0.680439384999826	73.6567928851722	48
CSL_chr2_L recq4ab_figl1	119	P3ID62	SL2_Mut_34	0.6_23d	4808_U	0.210864055530749	0.695617615362484	74.04233878276	48
CSL_chr2_L recq4ab_figl1	121	P3ID62	SL2_Mut_46	0.6_23d	4808_W	0.218802742509428	0.691465434215781	76.3367282793835	45
CSL_chr2_L recq4ab_figl1	122	P3ID62	SL2_Mut_46	0.6_23d	4808_X	0.221054018200554	0.718869237475134	76.637432056895	50
CSL_chr2_L recq4ab_figl1	129	P3ID62	SL2_Mut_53	0.6_23d	4808_AE	0.21062201337347	0.713724335411547	72.9373805443985	48
CSL_chr2_L recq4ab_figl1	131	P3ID62	SL2_Mut_34	0.6_23d	4808_AG	0.204200835023602	0.716844320354299	74.3579424468163	49
CSL_chr2_L recq4ab_figl1	132	P3ID62	SL2_Mut_34	0.6_23d	4808_AH	0.215268415314817	0.658065455094291	74.5050407206425	49
CSL_chr2_L recq4ab_figl1	133	P3ID62	SL2_Mut_46	0.6_23d	4808_AI	0.210042544769155	0.704207415238965	77.0619945865888	52
CSL_chr2_L recq4ab_figl1	134	P3ID62	SL2_Mut_46	0.6_23d	4808_AJ	0.204008301265022	0.654959995152676	77.8316142704726	50
CSL_chr2_L recq4ab_figl1	142	P3ID62	SL2_Mut_53	0.6_23d	4808_AR	0.200274087966519	0.832063058460448	73.3626854604137	48
CSL_chr2_L recq4ab_figl1	143	P3ID62	SL2_Mut_34	0.6_23d	4808_AS	0.209695455522642	0.710373116754383	74.7655921852417	49
CSL_chr2_L recq4ab_figl1	144	P3ID62	SL2_Mut_34	0.6_23d	4808_AT	0.208094050169306	0.698579850463204	73.2441090091796	48
CSL_chr2_L recq4ab_figl1	145	P3ID62	SL2_Mut_46	0.6_23d	4808_AU	0.202421755973228	0.701602970858055	74.6216425651321	48
CSL_chr2_L recq4ab_figl1	146	P3ID62	SL2_Mut_46	0.6_23d	4808_AV	0.216648528402324	0.705455533012764	76.0967943926658	50
CSL_chr2_L recq4ab_figl1	153	P3ID62	SL2_Mut_53	0.6_23d	4808_BC	0.216024718426781	0.692038611406305	72.2570452894388	46
CSL_chr2_L recq4ab_figl1	154	P3ID62	SL2_Mut_53	0.6_23d	4808_BD	0.209084834080531	0.74569014084507	72.7393337337332	48
CSL_chr2_L recq4ab_figl1	155	P3ID62	SL2_Mut_34	0.6_23d	4808_BE	0.210697257916705	0.725144476117036	73.593047710264	48
CSL_chr2_L recq4ab_figl1	156	P3ID62	SL2_Mut_34	0.6_23d	4808_BF	0.214470168276079	0.689765416343232	74.2570483015857	48
CSL_chr2_L recq4ab_figl1	157	P3ID62	SL2_Mut_46	0.6_23d	4808_BG	0.222756356836009	0.614548920441484	76.4370153575231	48
CSL_chr2_L recq4ab_figl1	158	P3ID62	SL2_Mut_46	0.6_23d	4808_BH	0.21513431349431	0.715022754374437	73.3567840207265	44
CSL_chr2_L recq4ab_figl1	165	P3ID62	SL2_Mut_53	0.6_23d	4808_BO	0.208927149609625	0.75697349464512	71.8178816855602	49
CSL_chr2_L recq4ab_figl1	166	P3ID62	SL2_Mut_53	0.6_23d	4808_BP	0.21611121825343	0.695755376100172	73.970204398824	47
CSL_chr2_L recq4ab_figl1	167	P3ID62	SL2_Mut_34	0.6_23d	4808_BQ	0.215104044970825	0.728366836474945	74.0844589151979	48
CSL_chr2_L recq4ab_figl1	168	P3ID62	SL2_Mut_34	0.6_23d	4808_BR	0.212388350863177	0.689221150638515	73.5518142060294	48
CSL_chr2_L recq4ab_figl1	169	P3ID62	SL2_Mut_46	0.6_23d	4808_BS	0.199611093763521	0.836100384370716	74.2348987275977	49
CSL_chr2_L recq4ab_figl1	170	P3ID62	SL2_Mut_46	0.6_23d	4808_BT	0.22051324977185	0.627841460561747	76.1931439417388	46
CSL_chr2_L recq4ab_figl1	177	P3ID62	SL2_Mut_53	0.6_23d	4808_CA	0.211725228149922	0.712131045403806	72.3018478483287	46
CSL_chr2_L recq4ab_figl1	178	P3ID62	SL2_Mut_53	0.6_23d	4808_CB	0.223350392492991	0.646635431955545	73.8047491205813	48
CSL_chr2_L recq4ab_figl1	179	P3ID62	SL2_Mut_34	0.6_23d	4808_CC	0.196570674939154	0.822317087326051	74.930376800078	50
CSL_chr2_L recq4ab_figl1	180	P3ID62	SL2_Mut_34	0.6_23d	4808_CD	0.213557847701588	0.699260723554538	74.1668117170951	49
CSL_chr2_L recq4ab_figl1	181	P3ID62	SL2_Mut_46	0.6_23d	4808_CE	0.211171167931992	0.674789556066547	76.3465197789726	48
CSL_chr2_L recq4ab_figl1	182	P3ID62	SL2_Mut_46	0.6_23d	4808_CF	0.209944637578977	0.735678998962415	76.8902491059882	52
CSL_chr2_L recq4ab_figl1	189	P3ID62	SL2_Mut_53	0.6_23d	4808_CM	0.207801384195226	0.717707206030526	73.0408764774182	48
CSL_chr2_L recq4ab_figl1	190	P3ID62	SL2_Mut_53	0.6_23d	4808_CN	0.207706303791216	0.719957354142092	74.2151747204051	43
CSL_chr2_L recq4ab_figl1	191	P3ID62	SL2_Mut_34	0.6_23d	4808_CO	0.212213147199608	0.757115553317034	74.9684440714701	48
CSL_chr2_L recq4ab_figl1	192	P3ID62	SL2_Mut_34	0.6_23d	4808_CP	0.218415004438675	0.723445230621908	73.6616655773408	44
CSL_chr2_L recq4ab_figl1	193	P3ID62	SL2_Mut_46	0.6_23d	4808_CQ	0.21154364893099	0.711901931898081	74.8583689311967	47
CSL_chr2_L recq4ab_figl1	194	P3ID62	SL2_Mut_46	0.6_23d	4808_CR	0.220277463198642	0.590778413757033	76.0337850004947	48
CSL_chr2_L recq4ab_figl1	201	P3ID62	SL2_Mut_53	0.6_23d	4809_G	0.195340491400553	0.704211480932821	73.682559040717	48
CSL_chr2_L recq4ab_figl1	202	P3ID62	SL2_Mut_53	0.6_23d	4809_H	0.213654618969768	0.661462197564098	73.5095520536152	49
CSL_chr2_L recq4ab_figl1	203	P3ID62	SL2_Mut_34	0.6_23d	4809_I	0.210099275881535	0.716060150210621	74.4860614026273	47
CSL_chr2_L recq4ab_figl1	204	P3ID62	SL2_Mut_34	0.6_23d	4809_J	0.204307031502815	0.783456675082077	75.1749782758634	50
CSL_chr2_L recq4ab_figl1	205	P3ID62	SL2_Mut_46	0.6_23d	4809_K	0.220149136549691	0.632424682003501	76.925791944851	49
CSL_chr2_L recq4ab_figl1	206	P3ID62	SL2_Mut_46	0.6_23d	4809_L	0.21835979759534	0.671205595673715	76.444609752828	47
CSL_chr2_L recq4ab_figl1	213	P3ID62	SL2_Mut_53	0.6_23d	4809_S	0.197761696356059	0.65816796293108	73.0142565691835	47
CSL_chr2_L recq4ab_figl1	214	P3ID62	SL2_Mut_53	0.6_23d	4809_T	0.208789439015846	0.772076255760471	72.5524897279067	48
CSL_chr2_L recq4ab_figl1	215	P3ID62	SL2_Mut_34	0.6_23d	4809_U	0.202682124893715	0.802687849503557	75.1059049522161	45
CSL_chr2_L recq4ab_figl1	216	P3ID62	SL2_Mut_34	0.6_23d	4809_V	0.215271423219565	0.776521264143582	73.9271246713576	44
CSL_chr2_L recq4ab_figl1	217	P3ID62	SL2_Mut_46	0.6_23d	4809_W	0.217049788228653	0.671921536129752	76.3803993513242	45
CSL_chr2_L recq4ab_figl1	218	P3ID62	SL2_Mut_46	0.6_23d	4809_X	0.226956540372156	0.689781359685033	76.3109470501488	50
CSL_chr2_L recq4ab_figl1	225	P3ID62	SL2_Mut_53	0.6_23d	4809_AE	0.204603547197675	0.722067745197169	73.5679249831392	48
CSL_chr2_L recq4ab_figl1	226	P3ID62	SL2_Mut_53	0.6_23d	4809_AF	0.173357962934135	0.815121870336594	73.1514831855329	52
CSL_chr2_L recq4ab_figl1	227	P3ID62	SL2_Mut_34	0.6_23d	4809_AG	0.205855650501097	0.755902954747396	74.4410018772206	45
CSL_chr2_L recq4ab_figl1	228	P3ID62	SL2_Mut_34	0.6_23d	4809_AH	0.201204583288151	0.812966140271018	74.3647227384695	52
CSL_chr2_L recq4ab_figl1	229	P3ID62	SL2_Mut_46	0.6_23d	4809_AI	0.212054826609457	0.655050854678098	76.5385063636703	47
CSL_chr2_L recq4ab_figl1	237	P3ID62	SL2_Mut_53	0.6_23d	4809_AQ	0.207410774721227	0.732946477095423	72.9934285106752	48
CSL_chr2_L recq4ab_figl1	238	P3ID62	SL2_Mut_53	0.6_23d	4809_AR	0.195670786919964	0.760008538549611	73.71561176983	51
CSL_chr2_L recq4ab_figl1	240	P3ID62	SL2_Mut_34	0.6_23d	4809_AT	0.210204032794978	0.672923974974154	74.6023918006194	48
CSL_chr2_L recq4ab_figl1	241	P3ID62	SL2_Mut_46	0.6_23d	4809_AU	0.225070027304746	0.666363457097966	76.369001740017	43
CSL_chr2_L recq4ab_figl1	242	P3ID62	SL2_Mut_46	0.6_23d	4809_AV	0.219010757600563	0.663466424327705	77.0565171730323	50
CSL_chr2_L recq4ab_figl1	249	P3ID62	SL2_Mut_53	0.6_23d	4809_BC	0.216343680085363	0.705415336425517	74.4209585185088	48
CSL_chr2_L recq4ab_figl1	250	P3ID62	SL2_Mut_53	0.6_23d	4809_BD	0.203500344382713	0.691521441159193	74.0821121043066	47
CSL_chr2_L recq4ab_figl1	251	P3ID62	SL2_Mut_34	0.6_23d	4809_BE	0.2195160250768	0.675499010460842	73.3821084487142	49
CSL_chr2_L recq4ab_figl1	252	P3ID62	SL2_Mut_34	0.6_23d	4809_BF	0.217580306872277	0.692501554012054	73.7056345337799	49
CSL_chr2_L recq4ab_figl1	253	P3ID62	SL2_Mut_46	0.6_23d	4809_BG	0.223251126120244	0.621821085275421	76.2942130946995	48
CSL_chr2_L recq4ab_figl1	254	P3ID62	SL2_Mut_46	0.6_23d	4809_BH	0.222411526635387	0.636728649700662	76.7678514760165	47
CSL_chr2_L recq4ab_figl1	261	P3ID62	SL2_Mut_53	0.6_23d	4809_BO	0.193580509654362	0.712791172101049	73.8546514711436	48
CSL_chr2_L recq4ab_figl1	262	P3ID62	SL2_Mut_53	0.6_23d	4809_BP	0.213173897440579	0.687396361396693	74.5006420586648	48
CSL_chr2_L recq4ab_figl1	263	P3ID62	SL2_Mut_34	0.6_23d	4809_BQ	0.214984284459234	0.714017267118354	74.191304532531	45
CSL_chr2_L recq4ab_figl1	264	P3ID62	SL2_Mut_34	0.6_23d	4809_BR	0.204810953470347	0.732791301876293	73.7901050943618	48
CSL_chr2_L recq4ab_figl1	265	P3ID62	SL2_Mut_46	0.6_23d	4809_BS	0.208123630954803	0.6767143445025	74.2807335120505	47
CSL_chr2_L recq4ab_figl1	266	P3ID62	SL2_Mut_46	0.6_23d	4809_BT	0.200644141967732	0.703367883783201	75.3822508286036	47
CSL_chr2_L recq4ab_figl1	273	P3ID62	SL2_Mut_53	0.6_23d	4809_CA	0.208727216751598	0.65465229516179	73.9324698486793	48
CSL_chr2_L recq4ab_figl1	274	P3ID62	SL2_Mut_53	0.6_23d	4809_CB	0.194588233767988	0.825757472315906	72.9311602163456	48
CSL_chr2_L recq4ab_figl1	275	P3ID62	SL2_Mut_34	0.6_23d	4809_CC	0.193208175485862	0.755493775786659	74.5232348619339	48
CSL_chr2_L recq4ab_figl1	276	P3ID62	SL2_Mut_34	0.6_23d	4809_CD	0.210971157178498	0.738228981419022	73.8681095533767	43
CSL_chr2_L recq4ab_figl1	277	P3ID62	SL2_Mut_46	0.6_23d	4809_CE	0.216399010048161	0.67952875952876	76.986336893383	47
CSL_chr2_L recq4ab_figl1	278	P3ID62	SL2_Mut_46	0.6_23d	4809_CF	0.21612629631153	0.750250272639069	76.7696397570435	47
CSL_chr2_L recq4ab_figl1	287	P3ID62	SL2_Mut_34	0.6_23d	4809_CO	0.199524197958243	0.754583926255912	75.1251834485967	NA
CSL_chr2_L recq4ab_figl1	288	P3ID62	SL2_Mut_34	0.6_23d	4809_CP	0.206911582466924	0.704972150196869	74.3162631093859	49
CSL_chr2_L recq4ab_figl1	289	P3ID62	SL2_Mut_46	0.6_23d	4809_CQ	0.218654676921414	0.590146018785536	76.8399747254347	50
CSL_chr2_L recq4ab_figl1	290	P3ID62	SL2_Mut_46	0.6_23d	4809_CR	0.20491268256517	0.723966271754123	77.2887162913034	51
CSL_chr2_L recq4ab_figl1	297	P3ID62	SL2_Mut_53	0.6_23d	4810_G	0.191006841963731	0.840924213569511	73.8624202480717	50
CSL_chr2_L recq4ab_figl1	299	P3ID62	SL2_Mut_34	0.6_23d	4810_I	0.217132322944888	0.684295934638125	74.6412119476287	47
CSL_chr2_L recq4ab_figl1	300	P3ID62	SL2_Mut_34	0.6_23d	4810_J	0.212964484978593	0.735206284406507	74.9601008484746	47
CSL_chr2_L recq4ab_figl1	301	P3ID62	SL2_Mut_46	0.6_23d	4810_K	0.208387477867405	0.684184799346743	73.5745868247485	47
CSL_chr2_L recq4ab_figl1	302	P3ID62	SL2_Mut_46	0.6_23d	4810_L	0.23468015797614	0.629058978432475	76.3325197006881	48
CSL_chr2_L recq4ab_figl1	309	P3ID62	SL2_Mut_53	0.6_23d	4810_S	0.203049123298449	0.810157133878064	72.5164619602772	49
CSL_chr2_L recq4ab_figl1	311	P3ID62	SL2_Mut_34	0.6_23d	4810_U	0.211584030903491	0.744359050610561	75.435336420104	50
CSL_chr2_L recq4ab_figl1	312	P3ID62	SL2_Mut_34	0.6_23d	4810_V	0.214977780937623	0.746585225086572	75.2476873814238	51
CSL_chr2_L recq4ab_figl1	313	P3ID62	SL2_Mut_46	0.6_23d	4810_W	0.2059064517684	0.678372856082799	74.926153654436	50
CSL_chr2_L recq4ab_figl1	314	P3ID62	SL2_Mut_46	0.6_23d	4810_X	0.223995446828711	0.663479996877716	76.3132045537379	47
CSL_chr2_L recq4ab_figl1	323	P3ID62	SL2_Mut_34	0.6_23d	4810_AG	0.216722207085289	0.721950999005515	73.9431571279343	48
CSL_chr2_L recq4ab_figl1	324	P3ID62	SL2_Mut_34	0.6_23d	4810_AH	0.203738848739534	0.718517967063323	74.4580726780752	47
CSL_chr2_L recq4ab_figl1	325	P3ID62	SL2_Mut_46	0.6_23d	4810_AI	0.230624530761466	0.666615246890789	76.4540478627817	45
CSL_chr2_L recq4ab_figl1	326	P3ID62	SL2_Mut_46	0.6_23d	4810_AJ	0.226761552994963	0.649538338016861	77.0521277626584	49
CSL_chr2_L recq4ab_figl1	334	P3ID62	SL2_Mut_53	0.6_23d	4810_AR	0.198225077249414	0.684334156477745	72.5910570246028	51
CSL_chr2_L recq4ab_figl1	336	P3ID62	SL2_Mut_34	0.6_23d	4810_AT	0.207180895573821	0.702474796367415	74.0639851304021	48
CSL_chr2_L recq4ab_figl1	337	P3ID62	SL2_Mut_46	0.6_23d	4810_AU	0.236961363600541	0.648805741369611	75.8827264823592	49
CSL_chr2_L recq4ab_figl1	338	P3ID62	SL2_Mut_46	0.6_23d	4810_AV	0.208828623119186	0.72018495972843	74.7443757194523	48
CSL_chr2_L recq4ab_figl1	345	P3ID62	SL2_Mut_53	0.6_23d	4810_BC	0.206423806366645	0.7438074628997	72.8021024835288	48
CSL_chr2_L recq4ab_figl1	346	P3ID62	SL2_Mut_53	0.6_23d	4810_BD	0.20774147508811	0.75316014014691	74.0509079662589	45
CSL_chr2_L recq4ab_figl1	347	P3ID62	SL2_Mut_34	0.6_23d	4810_BE	0.194349461999722	0.789191607868541	75.0626335887207	49
CSL_chr2_L recq4ab_figl1	348	P3ID62	SL2_Mut_34	0.6_23d	4810_BF	0.218599118331398	0.744680527922482	74.3421030033089	43
CSL_chr2_L recq4ab_figl1	349	P3ID62	SL2_Mut_46	0.6_23d	4810_BG	0.203895798199159	0.675004505455962	76.7091334197716	48
CSL_chr2_L recq4ab_figl1	350	P3ID62	SL2_Mut_46	0.6_23d	4810_BH	0.211394091872943	0.690925679646182	77.3340515547421	49
CSL_chr2_L recq4ab_figl1	357	P3ID62	SL2_Mut_53	0.6_23d	4810_BO	0.166763828504565	0.771977448319065	71.7132478706049	49
CSL_chr2_L recq4ab_figl1	358	P3ID62	SL2_Mut_53	0.6_23d	4810_BP	0.211935020680463	0.708538011695906	72.2285314929676	49
CSL_chr2_L recq4ab_figl1	359	P3ID62	SL2_Mut_34	0.6_23d	4810_BQ	0.221905847457886	0.708357043736959	73.4417768433781	47
CSL_chr2_L recq4ab_figl1	360	P3ID62	SL2_Mut_34	0.6_23d	4810_BR	0.218911083484301	0.717400962184698	74.885557911822	48
CSL_chr2_L recq4ab_figl1	361	P3ID62	SL2_Mut_46	0.6_23d	4810_BS	0.224263111102551	0.708884625718232	76.5194491419052	44
CSL_chr2_L recq4ab_figl1	362	P3ID62	SL2_Mut_46	0.6_23d	4810_BT	0.198659758317103	0.64163560743482	74.8293670542377	49

## Sheet: CSL_chr5_L WT
Population	ID_Pot_Pheno	ID_Manip_Pheno	Line	Treatment	ID_Geno	Relative Expansion Rate RER18-31 [no unit]	Compactness 31DAS [no unit]	Hue 31DAS [no unit]	Bolting_time [DAS]
CSL_chr5_L WT	363	P3ID62	SL5_WT_34	0.6_23d	4810_BU	0.209149995500974	0.691572408311623	77.1237871877456	50
CSL_chr5_L WT	365	P3ID62	SL5_WT_49	0.6_23d	4810_BW	0.230043642361177	0.732891015304909	76.6617049185348	52
CSL_chr5_L WT	366	P3ID62	SL5_WT_49	0.6_23d	4810_BX	0.225756753376836	0.721882660101668	76.6041165545839	51
CSL_chr5_L WT	371	P3ID62	SL5_WT_34	0.6_23d	4810_CC	0.229486905981453	0.689280923048412	76.06162294905	51
CSL_chr5_L WT	373	P3ID62	SL5_WT_49	0.6_23d	4810_CE	0.217016029857048	0.701745935388513	76.1403640219239	50
CSL_chr5_L WT	374	P3ID62	SL5_WT_49	0.6_23d	4810_CF	0.206495904260187	0.764073847329016	74.1843605136357	50
CSL_chr5_L WT	379	P3ID62	SL5_WT_34	0.6_23d	4810_CK	0.21670018893543	0.689913062369	77.2969871643664	51
CSL_chr5_L WT	380	P3ID62	SL5_WT_34	0.6_23d	4810_CL	0.217260706479987	0.661145293700158	77.125879857939	52
CSL_chr5_L WT	382	P3ID62	SL5_WT_49	0.6_23d	4810_CN	0.213772444730874	0.651721078646994	75.4706136437052	53
CSL_chr5_L WT	387	P3ID62	SL5_WT_34	0.6_23d	4811_A	0.216296590867048	0.723650382221754	77.0905405306548	51
CSL_chr5_L WT	389	P3ID62	SL5_WT_49	0.6_23d	4811_C	0.221669851619658	0.744440034415981	76.7402407835432	51
CSL_chr5_L WT	390	P3ID62	SL5_WT_49	0.6_23d	4811_D	0.219116545304323	0.677647867950481	76.5536011728716	52
CSL_chr5_L WT	395	P3ID62	SL5_WT_34	0.6_23d	4811_I	0.217010984978099	0.702300825142921	76.9656362619989	52
CSL_chr5_L WT	396	P3ID62	SL5_WT_34	0.6_23d	4811_J	0.188146862728189	0.769888173260669	74.4726451310676	50
CSL_chr5_L WT	397	P3ID62	SL5_WT_49	0.6_23d	4811_K	0.218011781045182	0.680311632488582	76.4024161631286	55
CSL_chr5_L WT	398	P3ID62	SL5_WT_49	0.6_23d	4811_L	0.213911016906579	0.649437656553023	76.9150875123167	55
CSL_chr5_L WT	403	P3ID62	SL5_WT_34	0.6_23d	4811_Q	0.228449506412845	0.717442671864097	76.8150727849154	50
CSL_chr5_L WT	404	P3ID62	SL5_WT_34	0.6_23d	4811_R	0.202010637997836	0.792121949064471	75.0155265629406	50
CSL_chr5_L WT	405	P3ID62	SL5_WT_49	0.6_23d	4811_S	0.211656908330991	0.651196366457553	77.2292616713383	52
CSL_chr5_L WT	406	P3ID62	SL5_WT_49	0.6_23d	4811_T	0.228642484052949	0.675974575701789	76.5829066984519	52
CSL_chr5_L WT	411	P3ID62	SL5_WT_34	0.6_23d	4811_Y	0.213672131988566	0.610711339808465	77.683965687401	51
CSL_chr5_L WT	412	P3ID62	SL5_WT_34	0.6_23d	4811_Z	0.220572795257864	0.703250269431959	76.7717569735883	51
CSL_chr5_L WT	413	P3ID62	SL5_WT_49	0.6_23d	4811_AA	0.227604296368053	0.652782270834256	76.362230552687	52
CSL_chr5_L WT	414	P3ID62	SL5_WT_49	0.6_23d	4811_AB	0.21110100465273	0.652802813805232	77.2189886326439	54
CSL_chr5_L WT	419	P3ID62	SL5_WT_34	0.6_23d	4811_AG	0.216139946199171	0.667374615174779	77.5734096216801	53
CSL_chr5_L WT	420	P3ID62	SL5_WT_34	0.6_23d	4811_AH	0.226203291777744	0.682391178177597	77.6149840018689	53
CSL_chr5_L WT	421	P3ID62	SL5_WT_49	0.6_23d	4811_AI	0.19225577592617	0.750820533018249	73.8874578354819	51
CSL_chr5_L WT	422	P3ID62	SL5_WT_49	0.6_23d	4811_AJ	0.214135805302902	0.692366323459119	76.7408137555432	54
CSL_chr5_L WT	427	P3ID62	SL5_WT_34	0.6_23d	4811_AO	0.216170526890544	0.6774998726504	77.4480934454895	53
CSL_chr5_L WT	428	P3ID62	SL5_WT_34	0.6_23d	4811_AP	0.219361791988894	0.69667605737426	77.5397361260863	53
CSL_chr5_L WT	429	P3ID62	SL5_WT_49	0.6_23d	4811_AQ	0.211100626156982	0.673609401136084	76.9901793443662	55
CSL_chr5_L WT	430	P3ID62	SL5_WT_49	0.6_23d	4811_AR	0.212874835346598	0.63643268668137	77.009157914597	53
CSL_chr5_L WT	435	P3ID62	SL5_WT_34	0.6_23d	4811_AW	0.220723264339645	0.670878990071871	77.4179360389383	53
CSL_chr5_L WT	436	P3ID62	SL5_WT_34	0.6_23d	4811_AX	0.221714752723483	0.691211731435461	77.3650296990655	52
CSL_chr5_L WT	437	P3ID62	SL5_WT_49	0.6_23d	4811_AY	0.210527863291985	0.718371059513275	76.3137266050025	52
CSL_chr5_L WT	438	P3ID62	SL5_WT_49	0.6_23d	4811_AZ	0.224396581677777	0.730666692239825	75.6107945741742	53
CSL_chr5_L WT	443	P3ID62	SL5_WT_34	0.6_23d	4811_BE	0.225592465059148	0.681185243572325	77.3919082793578	53
CSL_chr5_L WT	444	P3ID62	SL5_WT_34	0.6_23d	4811_BF	0.213199188918753	0.665878872015772	77.702787425312	54
CSL_chr5_L WT	445	P3ID62	SL5_WT_49	0.6_23d	4811_BG	0.199609080544742	0.760951686659156	74.244804856098	52
CSL_chr5_L WT	446	P3ID62	SL5_WT_49	0.6_23d	4811_BH	0.214385436591343	0.691428810361319	77.2362134310286	52
CSL_chr5_L WT	451	P3ID62	SL5_WT_34	0.6_23d	4811_BM	0.216206386090402	0.715881320777535	77.9931502469027	52
CSL_chr5_L WT	452	P3ID62	SL5_WT_34	0.6_23d	4811_BN	0.232761612261589	0.662787120590648	76.7821152453307	52
CSL_chr5_L WT	453	P3ID62	SL5_WT_49	0.6_23d	4811_BO	0.211370723527625	0.709034787899252	76.7452209783731	51
CSL_chr5_L WT	454	P3ID62	SL5_WT_49	0.6_23d	4811_BP	0.224781180133472	0.768114656086668	75.9412192302063	52
CSL_chr5_L WT	459	P3ID62	SL5_WT_34	0.6_23d	4811_BU	0.214107311453495	0.6895819650142	77.1197243088947	51
CSL_chr5_L WT	461	P3ID62	SL5_WT_49	0.6_23d	4811_BW	0.19518710714279	0.742288243442614	74.3884923738757	52
CSL_chr5_L WT	462	P3ID62	SL5_WT_49	0.6_23d	4811_BX	0.210193162707659	0.648000133074946	76.8330017307186	51
CSL_chr5_L WT	467	P3ID62	SL5_WT_34	0.6_23d	4811_CC	0.22476827078556	0.748500455204283	76.8832982102486	54
CSL_chr5_L WT	468	P3ID62	SL5_WT_34	0.6_23d	4811_CD	0.226204957912337	0.669284043350005	77.2055232443445	52
CSL_chr5_L WT	469	P3ID62	SL5_WT_49	0.6_23d	4811_CE	0.216164780514577	0.74247378290159	76.8103724766995	51
CSL_chr5_L WT	470	P3ID62	SL5_WT_49	0.6_23d	4811_CF	0.213225546527265	0.688609646897951	76.7309533839765	56
CSL_chr5_L WT	475	P3ID62	SL5_WT_34	0.6_23d	4811_CK	0.219287137883726	0.680410737038475	77.3820220911994	52
CSL_chr5_L WT	476	P3ID62	SL5_WT_34	0.6_23d	4811_CL	0.22136214112505	0.673980786123348	77.6541735471325	52
CSL_chr5_L WT	477	P3ID62	SL5_WT_49	0.6_23d	4811_CM	0.213330917741333	0.697653642134906	77.3191869062121	54
CSL_chr5_L WT	478	P3ID62	SL5_WT_49	0.6_23d	4811_CN	0.193148901245602	0.785863519051868	74.3299513669603	52
CSL_chr5_L WT	483	P3ID62	SL5_WT_34	0.6_23d	4812_A	0.216453995552975	0.757401376703319	77.2840813900764	51
CSL_chr5_L WT	484	P3ID62	SL5_WT_34	0.6_23d	4812_B	0.227154522543117	0.693424286823754	77.3849628644365	53
CSL_chr5_L WT	485	P3ID62	SL5_WT_49	0.6_23d	4812_C	0.230865424000333	0.699834790962368	76.5834831800941	52
CSL_chr5_L WT	486	P3ID62	SL5_WT_49	0.6_23d	4812_D	0.217571445126817	0.688814249092549	76.948021767267	53
CSL_chr5_L WT	491	P3ID62	SL5_WT_34	0.6_23d	4812_I	0.231187111714738	0.707355193279031	76.9928999541313	52
CSL_chr5_L WT	492	P3ID62	SL5_WT_34	0.6_23d	4812_J	0.225133221276201	0.724134040971207	77.1245714820578	52
CSL_chr5_L WT	493	P3ID62	SL5_WT_49	0.6_23d	4812_K	0.210120710573381	0.734531558615356	77.0527706023976	52
CSL_chr5_L WT	494	P3ID62	SL5_WT_49	0.6_23d	4812_L	0.201134017168403	0.79159291377233	73.9552436622679	52
CSL_chr5_L WT	499	P3ID62	SL5_WT_34	0.6_23d	4812_Q	0.209656279470352	0.755459251472659	74.4535080322023	52
CSL_chr5_L WT	500	P3ID62	SL5_WT_34	0.6_23d	4812_R	0.21394521513274	0.666618778934666	76.7057243450373	52
CSL_chr5_L WT	501	P3ID62	SL5_WT_49	0.6_23d	4812_S	0.232213568548855	0.711921184390714	76.7313122049493	53
CSL_chr5_L WT	502	P3ID62	SL5_WT_49	0.6_23d	4812_T	0.231942389299291	0.714977571728152	76.430171085735	52
CSL_chr5_L WT	507	P3ID62	SL5_WT_34	0.6_23d	4812_Y	0.203888076892379	0.666779879198036	77.8429852384333	52
CSL_chr5_L WT	508	P3ID62	SL5_WT_34	0.6_23d	4812_Z	0.220213147538282	0.708381187462388	77.5740363406447	56
CSL_chr5_L WT	509	P3ID62	SL5_WT_49	0.6_23d	4812_AA	0.214530807340181	0.665618750709526	76.8295223501231	52
CSL_chr5_L WT	510	P3ID62	SL5_WT_49	0.6_23d	4812_AB	0.209029687138027	0.712295518186385	77.3089287814997	55
CSL_chr5_L WT	515	P3ID62	SL5_WT_34	0.6_23d	4812_AG	0.227897024477226	0.700808432298534	77.8482773097	51
CSL_chr5_L WT	516	P3ID62	SL5_WT_34	0.6_23d	4812_AH	0.192709323570903	0.730060991624595	75.4990394382922	51
CSL_chr5_L WT	517	P3ID62	SL5_WT_49	0.6_23d	4812_AI	0.213393270284388	0.710410328708169	76.0742125007537	54
CSL_chr5_L WT	518	P3ID62	SL5_WT_49	0.6_23d	4812_AJ	0.224173655951974	0.683763335430905	76.8905140038893	54
CSL_chr5_L WT	523	P3ID62	SL5_WT_34	0.6_23d	4812_AO	0.211120974039578	0.613726007673236	77.8782059897763	52
CSL_chr5_L WT	524	P3ID62	SL5_WT_34	0.6_23d	4812_AP	0.198768798080034	0.797643263486	75.7425740016388	51
CSL_chr5_L WT	525	P3ID62	SL5_WT_49	0.6_23d	4812_AQ	0.169164389925037	0.822823237201601	74.6799354880704	53
CSL_chr5_L WT	526	P3ID62	SL5_WT_49	0.6_23d	4812_AR	0.220821370536072	0.666733572857496	75.8415608717419	53
CSL_chr5_L WT	531	P3ID62	SL5_WT_34	0.6_23d	4812_AW	0.211496311953622	0.684260355436271	78.1808788162862	54
CSL_chr5_L WT	532	P3ID62	SL5_WT_34	0.6_23d	4812_AX	0.230415729544112	0.698899109722279	77.5356227168628	54
CSL_chr5_L WT	534	P3ID62	SL5_WT_49	0.6_23d	4812_AZ	0.222797920703384	0.673015037635204	76.1999300630328	NA
CSL_chr5_L WT	539	P3ID62	SL5_WT_34	0.6_23d	4812_BE	0.205523212827768	0.781976088427701	74.8989578597838	51
CSL_chr5_L WT	540	P3ID62	SL5_WT_34	0.6_23d	4812_BF	0.223395059080349	0.701201359463897	77.5751512587103	51
CSL_chr5_L WT	541	P3ID62	SL5_WT_49	0.6_23d	4812_BG	0.223096232063652	0.710202868163077	76.7062376963874	53
CSL_chr5_L WT	542	P3ID62	SL5_WT_49	0.6_23d	4812_BH	0.2261710813936	0.762668546752446	75.5209311771724	54
CSL_chr5_L WT	547	P3ID62	SL5_WT_34	0.6_23d	4812_BM	0.212004778367192	0.791255089512888	75.7606666794889	51
CSL_chr5_L WT	548	P3ID62	SL5_WT_34	0.6_23d	4812_BN	0.20961388856591	0.651383104125737	78.2456236968797	52
CSL_chr5_L WT	549	P3ID62	SL5_WT_49	0.6_23d	4812_BO	0.205679357405853	0.820114335363987	74.3689584958928	52
CSL_chr5_L WT	550	P3ID62	SL5_WT_49	0.6_23d	4812_BP	0.206800818436081	0.704350106348883	76.5707402436499	57
CSL_chr5_L WT	555	P3ID62	SL5_WT_34	0.6_23d	4812_BU	0.222848112696976	0.736333561148585	77.4118995052088	52
CSL_chr5_L WT	557	P3ID62	SL5_WT_49	0.6_23d	4812_BW	0.22240020722086	0.705056462005548	76.3425176484762	55
CSL_chr5_L WT	558	P3ID62	SL5_WT_49	0.6_23d	4812_BX	0.204789230383836	0.729767717117917	75.9586122712442	56
CSL_chr5_L WT	563	P3ID62	SL5_WT_34	0.6_23d	4812_CC	0.201359666811049	0.670319304479067	77.2967290686608	54
CSL_chr5_L WT	564	P3ID62	SL5_WT_34	0.6_23d	4812_CD	0.199404321156562	0.632425696132782	78.0604389438339	55
CSL_chr5_L WT	565	P3ID62	SL5_WT_49	0.6_23d	4812_CE	0.203038897562013	0.757665665344593	74.9268042750585	52
CSL_chr5_L WT	566	P3ID62	SL5_WT_49	0.6_23d	4812_CF	0.197136106996928	0.792823840687308	74.3640605146935	54
CSL_chr5_L WT	572	P3ID62	SL5_WT_34	0.6_23d	4812_CL	0.221543138731012	0.644165979818299	77.384661025369	52
CSL_chr5_L WT	573	P3ID62	SL5_WT_49	0.6_23d	4812_CM	0.201789416131332	0.733021573212159	76.9343212928254	52
CSL_chr5_L WT	580	P3ID62	SL5_WT_34	0.6_23d	4813_B	0.226798835192414	0.625717919940142	77.2271878866221	54
CSL_chr5_L WT	581	P3ID62	SL5_WT_49	0.6_23d	4813_C	0.200921039917212	0.760605652264458	75.1534969442196	52
CSL_chr5_L WT	582	P3ID62	SL5_WT_49	0.6_23d	4813_D	0.218698320332999	0.669342547916535	76.9812774558762	58
CSL_chr5_L WT	587	P3ID62	SL5_WT_34	0.6_23d	4813_I	0.214913833069243	0.695481510002283	77.3203823419258	51
CSL_chr5_L WT	588	P3ID62	SL5_WT_34	0.6_23d	4813_J	0.217842258618259	0.679341346760733	77.5289377585896	50
CSL_chr5_L WT	589	P3ID62	SL5_WT_49	0.6_23d	4813_K	0.216778495931614	0.72438281794505	76.9296925083742	53
CSL_chr5_L WT	590	P3ID62	SL5_WT_49	0.6_23d	4813_L	0.209261284513845	0.718612968908479	76.8363205661915	54
CSL_chr5_L WT	595	P3ID62	SL5_WT_34	0.6_23d	4813_Q	0.220298607565608	0.68443497273075	77.4734092167535	51
CSL_chr5_L WT	596	P3ID62	SL5_WT_34	0.6_23d	4813_R	0.190080487055404	0.825425102029519	76.1064334709534	52
CSL_chr5_L WT	597	P3ID62	SL5_WT_49	0.6_23d	4813_S	0.194252729799566	0.776139279566051	75.5920667278784	NA
CSL_chr5_L WT	598	P3ID62	SL5_WT_49	0.6_23d	4813_T	0.239872987422834	0.677607965218312	76.3405059281904	NA
CSL_chr5_L WT	605	P3ID62	SL5_WT_49	0.6_23d	4813_AA	0.200528199314469	0.797093762712214	74.8196251283806	52
CSL_chr5_L WT	606	P3ID62	SL5_WT_49	0.6_23d	4813_AB	0.215207272716842	0.680941295872668	77.9281639234654	NA
CSL_chr5_L WT	611	P3ID62	SL5_WT_34	0.6_23d	4813_AG	0.196148891576364	0.831874527238766	75.2515926598309	52
CSL_chr5_L WT	612	P3ID62	SL5_WT_34	0.6_23d	4813_AH	0.231731730568301	0.695795222741331	77.0843250439318	52
CSL_chr5_L WT	613	P3ID62	SL5_WT_49	0.6_23d	4813_AI	0.208216851374258	0.68733657791774	77.3375784104569	53
CSL_chr5_L WT	614	P3ID62	SL5_WT_49	0.6_23d	4813_AJ	0.22128025435471	0.676523569858482	76.7669465045181	54
CSL_chr5_L WT	619	P3ID62	SL5_WT_34	0.6_23d	4813_AO	0.215924698965853	0.651068795034343	77.3585675189281	52
CSL_chr5_L WT	620	P3ID62	SL5_WT_34	0.6_23d	4813_AP	0.215252354119376	0.673445615439819	77.8383803112648	51
CSL_chr5_L WT	621	P3ID62	SL5_WT_49	0.6_23d	4813_AQ	0.221962643083548	0.720131213007203	76.4317155029507	54
CSL_chr5_L WT	622	P3ID62	SL5_WT_49	0.6_23d	4813_AR	0.232098939345554	0.791013835691394	77.2539945616835	52
CSL_chr5_L WT	627	P3ID62	SL5_WT_34	0.6_23d	4813_AW	0.215361771039005	0.681755388603978	76.6638505486578	52
CSL_chr5_L WT	628	P3ID62	SL5_WT_34	0.6_23d	4813_AX	0.202673840668127	0.761927757797574	75.2037776487103	51
CSL_chr5_L WT	629	P3ID62	SL5_WT_49	0.6_23d	4813_AY	0.210777231596902	0.702185020669114	77.9538843264308	52
CSL_chr5_L WT	630	P3ID62	SL5_WT_49	0.6_23d	4813_AZ	0.208154743325279	0.664678918134344	78.0624134375475	52
CSL_chr5_L WT	635	P3ID62	SL5_WT_34	0.6_23d	4813_BE	0.219252646103056	0.616014751224231	77.2070756484499	52
CSL_chr5_L WT	636	P3ID62	SL5_WT_34	0.6_23d	4813_BF	0.20956592608822	0.620038398244652	77.8748106706538	54
CSL_chr5_L WT	637	P3ID62	SL5_WT_49	0.6_23d	4813_BG	0.206710310857334	0.750464863559527	76.7809857450346	53
CSL_chr5_L WT	638	P3ID62	SL5_WT_49	0.6_23d	4813_BH	0.203833752907626	0.678252147257201	77.7607244529415	52
CSL_chr5_L WT	643	P3ID62	SL5_WT_34	0.6_23d	4813_BM	0.206256516252512	0.775683298222018	74.1010599498297	52
CSL_chr5_L WT	644	P3ID62	SL5_WT_34	0.6_23d	4813_BN	0.218171393304536	0.736367531887348	77.2673856180462	53
CSL_chr5_L WT	645	P3ID62	SL5_WT_49	0.6_23d	4813_BO	0.218027414564604	0.68119806763285	77.1129422368412	54
CSL_chr5_L WT	646	P3ID62	SL5_WT_49	0.6_23d	4813_BP	0.22551487292268	0.672573657538407	76.9462242396417	52
CSL_chr5_L WT	651	P3ID62	SL5_WT_34	0.6_23d	4813_BU	0.23038505394392	0.688225369604026	76.9951505974068	53
CSL_chr5_L WT	653	P3ID62	SL5_WT_49	0.6_23d	4813_BW	0.221217719384705	0.688240448093089	77.4362823727579	52
CSL_chr5_L WT	654	P3ID62	SL5_WT_49	0.6_23d	4813_BX	0.227275926837588	0.721534664736042	76.9218582636541	53
CSL_chr5_L WT	660	P3ID62	SL5_WT_34	0.6_23d	4813_CD	0.215292705481045	0.710612402828098	76.7457221173146	52
CSL_chr5_L WT	661	P3ID62	SL5_WT_49	0.6_23d	4813_CE	0.227514219103044	0.720669297759222	77.2784899604019	53
CSL_chr5_L WT	662	P3ID62	SL5_WT_49	0.6_23d	4813_CF	0.207218979873224	0.641058190803818	77.6237585581233	54
CSL_chr5_L WT	667	P3ID62	SL5_WT_34	0.6_23d	4813_CK	0.213238486103515	0.690482813691448	77.7714324114439	54
CSL_chr5_L WT	668	P3ID62	SL5_WT_34	0.6_23d	4813_CL	0.214627548175803	0.629574136264914	77.9106640307944	52
CSL_chr5_L WT	669	P3ID62	SL5_WT_49	0.6_23d	4813_CM	0.235494975794404	0.720511678150537	75.9861713546798	53
CSL_chr5_L WT	670	P3ID62	SL5_WT_49	0.6_23d	4813_CN	0.202375233445744	0.816234987700767	74.556674539933	52
CSL_chr5_L WT	676	P3ID62	SL5_WT_34	0.6_23d	4814_B	0.235750450689229	0.728667273140778	76.5754707136363	53
CSL_chr5_L WT	677	P3ID62	SL5_WT_49	0.6_23d	4814_C	0.222600605751455	0.675695864297392	77.1719257324216	52
CSL_chr5_L WT	678	P3ID62	SL5_WT_49	0.6_23d	4814_D	0.210805161671083	0.655716695180118	76.9553030918031	55
CSL_chr5_L WT	683	P3ID62	SL5_WT_34	0.6_23d	4814_I	0.234714947185366	0.745712821945881	75.8415764269617	51
CSL_chr5_L WT	684	P3ID62	SL5_WT_34	0.6_23d	4814_J	0.226871663776452	0.694614122315021	77.11745780754	52
CSL_chr5_L WT	685	P3ID62	SL5_WT_49	0.6_23d	4814_K	0.233409205735804	0.739243889445694	75.1828959593207	53
CSL_chr5_L WT	686	P3ID62	SL5_WT_49	0.6_23d	4814_L	0.223609923108673	0.680884408240598	76.1794489295653	54
CSL_chr5_L WT	691	P3ID62	SL5_WT_34	0.6_23d	4814_Q	0.228411020803945	0.720276371015051	77.5366858500877	51
CSL_chr5_L WT	692	P3ID62	SL5_WT_34	0.6_23d	4814_R	0.225420283730102	0.687392904168395	77.6814052116962	52
CSL_chr5_L WT	693	P3ID62	SL5_WT_49	0.6_23d	4814_S	0.225025917410914	0.711598873422521	76.8479698004433	56
CSL_chr5_L WT	694	P3ID62	SL5_WT_49	0.6_23d	4814_T	0.125604652988707	0.908814379536813	70.9984308377355	53
CSL_chr5_L WT	700	P3ID62	SL5_WT_34	0.6_23d	4814_Z	0.222103057094515	0.657927068607334	77.9532794964584	51
CSL_chr5_L WT	701	P3ID62	SL5_WT_49	0.6_23d	4814_AA	0.223153499570845	0.659803343693066	76.6828963674946	57
CSL_chr5_L WT	702	P3ID62	SL5_WT_49	0.6_23d	4814_AB	0.209878076582815	0.629028790336767	77.1131999057019	55
CSL_chr5_L WT	707	P3ID62	SL5_WT_34	0.6_23d	4814_AG	0.229012897578702	0.702090428181072	76.8543919347987	54
CSL_chr5_L WT	708	P3ID62	SL5_WT_34	0.6_23d	4814_AH	0.0337770533976249	NA	NA	57
CSL_chr5_L WT	709	P3ID62	SL5_WT_49	0.6_23d	4814_AI	0.214684908750848	0.667678936069951	77.0355251204626	52
CSL_chr5_L WT	715	P3ID62	SL5_WT_34	0.6_23d	4814_AO	0.211201189083988	0.701434231820972	76.721187813918	55
CSL_chr5_L WT	716	P3ID62	SL5_WT_34	0.6_23d	4814_AP	0.221592186302837	0.720830813883178	77.7744349446271	51
CSL_chr5_L WT	718	P3ID62	SL5_WT_49	0.6_23d	4814_AR	0.220330317347205	0.721150344615611	76.9964098162169	55

## Sheet: CSL_chr5_L recq4ab_figl1
Population	ID_Pot_Pheno	ID_Manip_Pheno	Line	Treatment	ID_Geno	Relative Expansion Rate RER18-31 [no unit]	Compactness 31DAS [no unit]	Hue 31DAS [no unit]	Bolting_time [DAS]
CSL_chr5_L recq4ab_figl1	367	P3ID62	SL5_Mut_28	0.6_23d	4810_BY	0.232613381102078	0.731902989998153	76.3378242111196	51
CSL_chr5_L recq4ab_figl1	368	P3ID62	SL5_Mut_28	0.6_23d	4810_BZ	0.22304826748919	0.717620367446702	76.339872617744	NA
CSL_chr5_L recq4ab_figl1	369	P3ID62	SL5_Mut_11	0.6_23d	4810_CA	0.195592522338083	0.643042108091822	77.1751356082572	54
CSL_chr5_L recq4ab_figl1	370	P3ID62	SL5_Mut_11	0.6_23d	4810_CB	0.214973348773055	0.681363236093156	76.8659770684669	54
CSL_chr5_L recq4ab_figl1	375	P3ID62	SL5_Mut_28	0.6_23d	4810_CG	0.215749268965295	0.690077549342777	77.0733377391903	51
CSL_chr5_L recq4ab_figl1	376	P3ID62	SL5_Mut_28	0.6_23d	4810_CH	0.213819702921221	0.722573623559539	74.3578424978261	52
CSL_chr5_L recq4ab_figl1	377	P3ID62	SL5_Mut_11	0.6_23d	4810_CI	0.199238800292931	0.677637021840284	76.9281673543235	51
CSL_chr5_L recq4ab_figl1	378	P3ID62	SL5_Mut_11	0.6_23d	4810_CJ	0.196188302633024	0.769640730642338	76.1507305674209	52
CSL_chr5_L recq4ab_figl1	383	P3ID62	SL5_Mut_28	0.6_23d	4810_CO	0.207528408939171	0.643394590361109	76.9761665823262	50
CSL_chr5_L recq4ab_figl1	384	P3ID62	SL5_Mut_28	0.6_23d	4810_CP	0.193785014945323	0.75811141914863	75.2690502451542	50
CSL_chr5_L recq4ab_figl1	385	P3ID62	SL5_Mut_11	0.6_23d	4810_CQ	0.215451462576555	0.730802592507392	76.8791330967192	51
CSL_chr5_L recq4ab_figl1	386	P3ID62	SL5_Mut_11	0.6_23d	4810_CR	0.215058265761759	0.649769166835455	77.361100146039	50
CSL_chr5_L recq4ab_figl1	391	P3ID62	SL5_Mut_28	0.6_23d	4811_E	0.237902395544286	0.697283958581981	75.9455423826119	52
CSL_chr5_L recq4ab_figl1	393	P3ID62	SL5_Mut_11	0.6_23d	4811_G	0.201019573358911	0.779363969226972	75.2550826528762	52
CSL_chr5_L recq4ab_figl1	394	P3ID62	SL5_Mut_11	0.6_23d	4811_H	0.19450585704262	0.762598799949131	75.4367209911467	51
CSL_chr5_L recq4ab_figl1	399	P3ID62	SL5_Mut_28	0.6_23d	4811_M	0.202706401760388	0.795493824558445	74.2084077775363	52
CSL_chr5_L recq4ab_figl1	400	P3ID62	SL5_Mut_28	0.6_23d	4811_N	0.227903183534979	0.683154453452684	76.6260876766757	52
CSL_chr5_L recq4ab_figl1	401	P3ID62	SL5_Mut_11	0.6_23d	4811_O	0.205965925847367	0.671989190760837	77.4378563564954	53
CSL_chr5_L recq4ab_figl1	402	P3ID62	SL5_Mut_11	0.6_23d	4811_P	0.20372752345691	0.617342250093791	77.0507253491599	52
CSL_chr5_L recq4ab_figl1	407	P3ID62	SL5_Mut_28	0.6_23d	4811_U	0.224291610961463	0.629146788530106	77.1688703001208	51
CSL_chr5_L recq4ab_figl1	408	P3ID62	SL5_Mut_28	0.6_23d	4811_V	0.22198864865897	0.740489783024251	76.6490228612063	50
CSL_chr5_L recq4ab_figl1	409	P3ID62	SL5_Mut_11	0.6_23d	4811_W	0.207657325125342	0.660022306589235	77.6562576723585	51
CSL_chr5_L recq4ab_figl1	410	P3ID62	SL5_Mut_11	0.6_23d	4811_X	0.206587978002762	0.692427068664175	76.9243559525953	51
CSL_chr5_L recq4ab_figl1	415	P3ID62	SL5_Mut_28	0.6_23d	4811_AC	0.222957763134867	0.722122690144862	76.425471714651	51
CSL_chr5_L recq4ab_figl1	416	P3ID62	SL5_Mut_28	0.6_23d	4811_AD	0.213704034625656	0.706566114293791	77.4055883553889	50
CSL_chr5_L recq4ab_figl1	417	P3ID62	SL5_Mut_11	0.6_23d	4811_AE	0.220546731027731	0.677003531242519	77.3187108620784	51
CSL_chr5_L recq4ab_figl1	418	P3ID62	SL5_Mut_11	0.6_23d	4811_AF	0.202266161238441	0.609047984238138	77.8998851493235	53
CSL_chr5_L recq4ab_figl1	423	P3ID62	SL5_Mut_28	0.6_23d	4811_AK	0.211869946304657	0.677365370262602	76.5712912998475	55
CSL_chr5_L recq4ab_figl1	424	P3ID62	SL5_Mut_28	0.6_23d	4811_AL	0.213065371672362	0.71375683140389	76.6244272166953	NA
CSL_chr5_L recq4ab_figl1	425	P3ID62	SL5_Mut_11	0.6_23d	4811_AM	0.181770703692988	0.761397019596685	75.5280342791683	52
CSL_chr5_L recq4ab_figl1	426	P3ID62	SL5_Mut_11	0.6_23d	4811_AN	0.208375132244703	0.655936727066304	77.5900696764623	53
CSL_chr5_L recq4ab_figl1	431	P3ID62	SL5_Mut_28	0.6_23d	4811_AS	0.231453456777935	0.711299547239866	77.1699501457118	52
CSL_chr5_L recq4ab_figl1	432	P3ID62	SL5_Mut_28	0.6_23d	4811_AT	0.226459424777874	0.737477627274939	77.1490578610808	52
CSL_chr5_L recq4ab_figl1	433	P3ID62	SL5_Mut_11	0.6_23d	4811_AU	0.188679069678918	0.78542322652343	74.2355166018111	52
CSL_chr5_L recq4ab_figl1	434	P3ID62	SL5_Mut_11	0.6_23d	4811_AV	0.215394543525942	0.636566559722295	77.9216183666574	52
CSL_chr5_L recq4ab_figl1	439	P3ID62	SL5_Mut_28	0.6_23d	4811_BA	0.222426177240285	0.717856113068679	77.0640163554881	50
CSL_chr5_L recq4ab_figl1	440	P3ID62	SL5_Mut_28	0.6_23d	4811_BB	0.203101871375839	0.642028703295652	77.4408862657298	52
CSL_chr5_L recq4ab_figl1	442	P3ID62	SL5_Mut_11	0.6_23d	4811_BD	0.201701815669972	0.587005094750484	77.2254011643823	55
CSL_chr5_L recq4ab_figl1	447	P3ID62	SL5_Mut_28	0.6_23d	4811_BI	0.215538048792019	0.668674741827412	77.5449165224322	51
CSL_chr5_L recq4ab_figl1	448	P3ID62	SL5_Mut_28	0.6_23d	4811_BJ	0.228810684263367	0.645216179544538	76.4877032347501	52
CSL_chr5_L recq4ab_figl1	449	P3ID62	SL5_Mut_11	0.6_23d	4811_BK	0.212548685413249	0.69980511711414	78.1906372656427	51
CSL_chr5_L recq4ab_figl1	450	P3ID62	SL5_Mut_11	0.6_23d	4811_BL	0.206797696711364	0.625838903136533	77.4282136210995	52
CSL_chr5_L recq4ab_figl1	455	P3ID62	SL5_Mut_28	0.6_23d	4811_BQ	0.173092375471671	0.831106557377049	73.9251219411089	53
CSL_chr5_L recq4ab_figl1	456	P3ID62	SL5_Mut_28	0.6_23d	4811_BR	0.233077478503715	0.699960806514828	76.480015060058	53
CSL_chr5_L recq4ab_figl1	457	P3ID62	SL5_Mut_11	0.6_23d	4811_BS	0.192193565184585	0.758389890264863	75.8767591798205	50
CSL_chr5_L recq4ab_figl1	458	P3ID62	SL5_Mut_11	0.6_23d	4811_BT	0.180856369311228	0.706157200706053	75.7928994678122	51
CSL_chr5_L recq4ab_figl1	463	P3ID62	SL5_Mut_28	0.6_23d	4811_BY	0.214929650587186	0.709026713952952	76.9812398536169	50
CSL_chr5_L recq4ab_figl1	464	P3ID62	SL5_Mut_28	0.6_23d	4811_BZ	0.236469972787927	0.65429367388769	76.9912807146477	51
CSL_chr5_L recq4ab_figl1	465	P3ID62	SL5_Mut_11	0.6_23d	4811_CA	0.186954797655185	0.711621867819608	75.4860487344	51
CSL_chr5_L recq4ab_figl1	466	P3ID62	SL5_Mut_11	0.6_23d	4811_CB	0.19978395877578	0.646773057053527	77.7606324413119	52
CSL_chr5_L recq4ab_figl1	471	P3ID62	SL5_Mut_28	0.6_23d	4811_CG	0.182573229798873	0.831790925791134	72.22749560794	53
CSL_chr5_L recq4ab_figl1	472	P3ID62	SL5_Mut_28	0.6_23d	4811_CH	0.230698743774703	0.701457674551845	76.0912198549432	53
CSL_chr5_L recq4ab_figl1	473	P3ID62	SL5_Mut_11	0.6_23d	4811_CI	0.21042664253913	0.673699792869588	77.7730782036702	53
CSL_chr5_L recq4ab_figl1	474	P3ID62	SL5_Mut_11	0.6_23d	4811_CJ	0.214596646245699	0.648818983643265	77.5129031773604	52
CSL_chr5_L recq4ab_figl1	479	P3ID62	SL5_Mut_28	0.6_23d	4811_CO	0.225068854596115	0.761624668435013	76.3560028040276	52
CSL_chr5_L recq4ab_figl1	480	P3ID62	SL5_Mut_28	0.6_23d	4811_CP	0.221950111145758	0.665749955038667	76.3690270792407	53
CSL_chr5_L recq4ab_figl1	482	P3ID62	SL5_Mut_11	0.6_23d	4811_CR	0.210718334609869	0.698143132797783	77.5321355649867	52
CSL_chr5_L recq4ab_figl1	487	P3ID62	SL5_Mut_28	0.6_23d	4812_E	0.221951791041494	0.689216474356134	76.476700172941	51
CSL_chr5_L recq4ab_figl1	488	P3ID62	SL5_Mut_28	0.6_23d	4812_F	0.232434927059017	0.720872627638744	77.0036974625382	51
CSL_chr5_L recq4ab_figl1	489	P3ID62	SL5_Mut_11	0.6_23d	4812_G	0.212796195937453	0.685520022722822	77.5385620975019	51
CSL_chr5_L recq4ab_figl1	490	P3ID62	SL5_Mut_11	0.6_23d	4812_H	0.209002563399699	0.617307110812162	78.2628023715609	52
CSL_chr5_L recq4ab_figl1	495	P3ID62	SL5_Mut_28	0.6_23d	4812_M	0.223645385561922	0.698617438287954	77.2101507540722	52
CSL_chr5_L recq4ab_figl1	496	P3ID62	SL5_Mut_28	0.6_23d	4812_N	0.206309839692191	0.769633012647281	74.5075464196417	51
CSL_chr5_L recq4ab_figl1	497	P3ID62	SL5_Mut_11	0.6_23d	4812_O	0.20069389813122	0.589422646183035	77.9672010801883	51
CSL_chr5_L recq4ab_figl1	498	P3ID62	SL5_Mut_11	0.6_23d	4812_P	0.209816169673095	0.671583163910579	77.0564021105265	52
CSL_chr5_L recq4ab_figl1	503	P3ID62	SL5_Mut_28	0.6_23d	4812_U	0.227877483650522	0.702584833361864	76.6678799086579	51
CSL_chr5_L recq4ab_figl1	504	P3ID62	SL5_Mut_28	0.6_23d	4812_V	0.205129615777811	0.794459923134121	74.1930836783246	52
CSL_chr5_L recq4ab_figl1	505	P3ID62	SL5_Mut_11	0.6_23d	4812_W	0.216044980575822	0.673011296186643	77.0261630680952	52
CSL_chr5_L recq4ab_figl1	506	P3ID62	SL5_Mut_11	0.6_23d	4812_X	0.212626197687881	0.622097884254819	77.8079633405493	52
CSL_chr5_L recq4ab_figl1	511	P3ID62	SL5_Mut_28	0.6_23d	4812_AC	0.2277091213071	0.699242921717619	76.3390491973683	51
CSL_chr5_L recq4ab_figl1	512	P3ID62	SL5_Mut_28	0.6_23d	4812_AD	0.244337881682558	0.724287917139449	75.6306219427885	53
CSL_chr5_L recq4ab_figl1	513	P3ID62	SL5_Mut_11	0.6_23d	4812_AE	0.207617980931376	0.688287427601443	77.8257071352696	53
CSL_chr5_L recq4ab_figl1	514	P3ID62	SL5_Mut_11	0.6_23d	4812_AF	0.20864429123887	0.66309814879497	77.7848850697694	54
CSL_chr5_L recq4ab_figl1	519	P3ID62	SL5_Mut_28	0.6_23d	4812_AK	0.225282934087294	0.668191210563451	76.5045435132008	52
CSL_chr5_L recq4ab_figl1	520	P3ID62	SL5_Mut_28	0.6_23d	4812_AL	0.216861933323536	0.672936694842321	77.3945346763491	50
CSL_chr5_L recq4ab_figl1	521	P3ID62	SL5_Mut_11	0.6_23d	4812_AM	0.215203551181606	0.719330267432348	77.3256517637027	52
CSL_chr5_L recq4ab_figl1	522	P3ID62	SL5_Mut_11	0.6_23d	4812_AN	0.188518285610598	0.687899889074936	77.6000305608971	51
CSL_chr5_L recq4ab_figl1	527	P3ID62	SL5_Mut_28	0.6_23d	4812_AS	0.208157043774238	0.804242178799231	72.7216953365164	53
CSL_chr5_L recq4ab_figl1	528	P3ID62	SL5_Mut_28	0.6_23d	4812_AT	0.247279212465183	0.700750687340016	75.8030665208276	53
CSL_chr5_L recq4ab_figl1	529	P3ID62	SL5_Mut_11	0.6_23d	4812_AU	0.209333070647559	0.658942622752142	77.5806705789651	54
CSL_chr5_L recq4ab_figl1	530	P3ID62	SL5_Mut_11	0.6_23d	4812_AV	0.227120949223917	0.693488226934882	77.0789628198379	54
CSL_chr5_L recq4ab_figl1	535	P3ID62	SL5_Mut_28	0.6_23d	4812_BA	0.232697261864778	0.689350622388692	76.2860774215565	51
CSL_chr5_L recq4ab_figl1	536	P3ID62	SL5_Mut_28	0.6_23d	4812_BB	0.228054873479593	0.71834218969956	75.9102349049088	53
CSL_chr5_L recq4ab_figl1	538	P3ID62	SL5_Mut_11	0.6_23d	4812_BD	0.193611894923677	0.770560965968304	75.8796700871888	NA
CSL_chr5_L recq4ab_figl1	544	P3ID62	SL5_Mut_28	0.6_23d	4812_BJ	0.227233191449061	0.738168213697495	75.7697796570974	53
CSL_chr5_L recq4ab_figl1	545	P3ID62	SL5_Mut_11	0.6_23d	4812_BK	0.210116669088686	0.683881233051082	77.7158081741378	52
CSL_chr5_L recq4ab_figl1	546	P3ID62	SL5_Mut_11	0.6_23d	4812_BL	0.210049847937759	0.661477605333921	77.7259078646507	NA
CSL_chr5_L recq4ab_figl1	551	P3ID62	SL5_Mut_28	0.6_23d	4812_BQ	0.217942055181904	0.629668104256516	77.4805780687425	51
CSL_chr5_L recq4ab_figl1	552	P3ID62	SL5_Mut_28	0.6_23d	4812_BR	0.215815663220097	0.724302122531297	77.6248548130682	51
CSL_chr5_L recq4ab_figl1	553	P3ID62	SL5_Mut_11	0.6_23d	4812_BS	0.202722232676544	0.655862443136764	78.7909993793067	56
CSL_chr5_L recq4ab_figl1	554	P3ID62	SL5_Mut_11	0.6_23d	4812_BT	0.203711909483927	0.636775925158796	78.2857319995826	55
CSL_chr5_L recq4ab_figl1	559	P3ID62	SL5_Mut_28	0.6_23d	4812_BY	0.2300807415251	0.700155635840176	76.3779682162683	53
CSL_chr5_L recq4ab_figl1	560	P3ID62	SL5_Mut_28	0.6_23d	4812_BZ	0.220037191327766	0.666569112612852	76.9008435431517	53
CSL_chr5_L recq4ab_figl1	561	P3ID62	SL5_Mut_11	0.6_23d	4812_CA	0.210971287081699	0.690571002034572	77.9591225546257	51
CSL_chr5_L recq4ab_figl1	562	P3ID62	SL5_Mut_11	0.6_23d	4812_CB	0.189537570228977	0.76931083014985	75.6172114930731	NA
CSL_chr5_L recq4ab_figl1	567	P3ID62	SL5_Mut_28	0.6_23d	4812_CG	-0.120582453067335	NA	NA	NA
CSL_chr5_L recq4ab_figl1	568	P3ID62	SL5_Mut_28	0.6_23d	4812_CH	0.228183113912123	0.720303973593661	76.7042850886129	52
CSL_chr5_L recq4ab_figl1	569	P3ID62	SL5_Mut_11	0.6_23d	4812_CI	0.218772884394925	0.624595306633741	76.8402713419257	57
CSL_chr5_L recq4ab_figl1	575	P3ID62	SL5_Mut_28	0.6_23d	4812_CO	0.224414575885496	0.711342365538663	76.9703478017164	51
CSL_chr5_L recq4ab_figl1	576	P3ID62	SL5_Mut_28	0.6_23d	4812_CP	0.235392686591856	0.699123156336642	76.7056141781897	52
CSL_chr5_L recq4ab_figl1	577	P3ID62	SL5_Mut_11	0.6_23d	4812_CQ	0.206793221778811	0.632698826597132	77.8420111625442	51
CSL_chr5_L recq4ab_figl1	578	P3ID62	SL5_Mut_11	0.6_23d	4811_CQ	0.193177788265839	0.599576789341046	77.8123377213128	NA
CSL_chr5_L recq4ab_figl1	583	P3ID62	SL5_Mut_28	0.6_23d	4813_E	0.241157241941841	0.737348591810953	75.3304015699266	51
CSL_chr5_L recq4ab_figl1	584	P3ID62	SL5_Mut_28	0.6_23d	4813_F	0.250818371749529	0.757905322358375	75.9040479165987	53
CSL_chr5_L recq4ab_figl1	585	P3ID62	SL5_Mut_11	0.6_23d	4813_G	0.216403321671856	0.648547302927615	77.1984426487413	53
CSL_chr5_L recq4ab_figl1	586	P3ID62	SL5_Mut_11	0.6_23d	4813_H	0.20349214881101	0.630644880889126	77.8769054114133	56
CSL_chr5_L recq4ab_figl1	591	P3ID62	SL5_Mut_28	0.6_23d	4813_M	0.220603734021325	0.700849333634516	77.2441550238563	52
CSL_chr5_L recq4ab_figl1	592	P3ID62	SL5_Mut_28	0.6_23d	4813_N	0.199042988857763	0.739847407137212	74.8614930447618	51
CSL_chr5_L recq4ab_figl1	593	P3ID62	SL5_Mut_11	0.6_23d	4813_O	0.201321474214622	0.743783127859845	75.6515606166039	51
CSL_chr5_L recq4ab_figl1	594	P3ID62	SL5_Mut_11	0.6_23d	4813_P	0.215058365488901	0.618074265845839	77.5403406466476	52
CSL_chr5_L recq4ab_figl1	599	P3ID62	SL5_Mut_28	0.6_23d	4813_U	0.22589518913689	0.722977560532439	77.465837140005	52
CSL_chr5_L recq4ab_figl1	600	P3ID62	SL5_Mut_28	0.6_23d	4813_V	0.209087723336183	0.636930698666823	77.6096199305894	56
CSL_chr5_L recq4ab_figl1	601	P3ID62	SL5_Mut_11	0.6_23d	4813_W	0.206547016159182	0.6708358662305	77.7347464921812	NA
CSL_chr5_L recq4ab_figl1	602	P3ID62	SL5_Mut_11	0.6_23d	4813_X	0.212699105420995	0.656844138731249	77.9805456164411	NA
CSL_chr5_L recq4ab_figl1	607	P3ID62	SL5_Mut_28	0.6_23d	4813_AC	0.218932418252696	0.641323126049044	77.207785278266	53
CSL_chr5_L recq4ab_figl1	608	P3ID62	SL5_Mut_28	0.6_23d	4813_AD	0.218425489134733	0.700025775082178	77.556434575292	52
CSL_chr5_L recq4ab_figl1	609	P3ID62	SL5_Mut_11	0.6_23d	4813_AE	0.193543080309681	0.7531613363288	74.9037845724146	52
CSL_chr5_L recq4ab_figl1	610	P3ID62	SL5_Mut_11	0.6_23d	4813_AF	0.212948246913686	0.665933546972508	78.563448374923	NA
CSL_chr5_L recq4ab_figl1	615	P3ID62	SL5_Mut_28	0.6_23d	4813_AK	0.233472205522545	0.68675235794801	77.7118388578202	52
CSL_chr5_L recq4ab_figl1	616	P3ID62	SL5_Mut_28	0.6_23d	4813_AL	0.22520330358849	0.708916628510092	77.3700373149874	52
CSL_chr5_L recq4ab_figl1	617	P3ID62	SL5_Mut_11	0.6_23d	4813_AM	0.217456481648025	0.689582196281981	77.9022034068218	51
CSL_chr5_L recq4ab_figl1	618	P3ID62	SL5_Mut_11	0.6_23d	4813_AN	0.192784898375452	0.764995366729797	76.1907668042106	51
CSL_chr5_L recq4ab_figl1	623	P3ID62	SL5_Mut_28	0.6_23d	4813_AS	0.230436952228678	0.691102593470397	77.3633575146626	51
CSL_chr5_L recq4ab_figl1	624	P3ID62	SL5_Mut_28	0.6_23d	4813_AT	0.197753935782009	0.782515234214363	74.9205585040643	54
CSL_chr5_L recq4ab_figl1	626	P3ID62	SL5_Mut_11	0.6_23d	4813_AV	0.195608233246087	0.624325973649196	77.9442532250494	51
CSL_chr5_L recq4ab_figl1	631	P3ID62	SL5_Mut_28	0.6_23d	4813_BA	0.201170118744973	0.788874266045758	75.0254420232112	51
CSL_chr5_L recq4ab_figl1	632	P3ID62	SL5_Mut_28	0.6_23d	4813_BB	0.222829889158345	0.716608944845102	77.252353861914	52
CSL_chr5_L recq4ab_figl1	633	P3ID62	SL5_Mut_11	0.6_23d	4813_BC	0.186005752104878	0.761717514257923	75.506433449384	51
CSL_chr5_L recq4ab_figl1	634	P3ID62	SL5_Mut_11	0.6_23d	4813_BD	0.217245732143944	0.701623070274899	77.6709159131806	52
CSL_chr5_L recq4ab_figl1	639	P3ID62	SL5_Mut_28	0.6_23d	4813_BI	0.220586550146796	0.693094985291814	77.4191043827187	53
CSL_chr5_L recq4ab_figl1	640	P3ID62	SL5_Mut_28	0.6_23d	4813_BJ	0.217547337248154	0.651659320413256	77.1876789829792	52
CSL_chr5_L recq4ab_figl1	641	P3ID62	SL5_Mut_11	0.6_23d	4813_BK	0.201713488519212	0.65934787842839	78.1650730337074	52
CSL_chr5_L recq4ab_figl1	642	P3ID62	SL5_Mut_11	0.6_23d	4813_BL	0.213664074532769	0.672289172247036	77.8809995235374	52
CSL_chr5_L recq4ab_figl1	647	P3ID62	SL5_Mut_28	0.6_23d	4813_BQ	0.214628756198106	0.733365091337343	77.2267521851178	55
CSL_chr5_L recq4ab_figl1	649	P3ID62	SL5_Mut_11	0.6_23d	4813_BS	0.19048193106772	0.754303173177986	76.0856642334501	51
CSL_chr5_L recq4ab_figl1	650	P3ID62	SL5_Mut_11	0.6_23d	4813_BT	0.186401219200598	0.658771902197306	74.8846278332583	52
CSL_chr5_L recq4ab_figl1	655	P3ID62	SL5_Mut_28	0.6_23d	4813_BY	0.215089228871138	0.661270708494889	77.6081408394124	54
CSL_chr5_L recq4ab_figl1	656	P3ID62	SL5_Mut_28	0.6_23d	4813_BZ	0.235346830172958	0.658155137043266	76.8276332594874	54
CSL_chr5_L recq4ab_figl1	657	P3ID62	SL5_Mut_11	0.6_23d	4813_CA	0.188917556364131	0.738596177397383	75.3841690767805	50
CSL_chr5_L recq4ab_figl1	658	P3ID62	SL5_Mut_11	0.6_23d	4813_CB	0.181522614728302	0.803536057515956	75.0893902087654	52
CSL_chr5_L recq4ab_figl1	663	P3ID62	SL5_Mut_28	0.6_23d	4813_CG	0.22337271787613	0.635636360019198	77.7875874794001	53
CSL_chr5_L recq4ab_figl1	664	P3ID62	SL5_Mut_28	0.6_23d	4813_CH	0.212711852366134	0.693873426208012	77.6115428388339	53
CSL_chr5_L recq4ab_figl1	665	P3ID62	SL5_Mut_11	0.6_23d	4813_CI	0.210609918872263	0.62911461366497	77.4924314282996	52
CSL_chr5_L recq4ab_figl1	666	P3ID62	SL5_Mut_11	0.6_23d	4813_CJ	0.201156900632819	0.662101677738993	78.5070605269425	54
CSL_chr5_L recq4ab_figl1	671	P3ID62	SL5_Mut_28	0.6_23d	4813_CO	0.213505003290788	0.681200740810223	77.6261607591583	53
CSL_chr5_L recq4ab_figl1	672	P3ID62	SL5_Mut_28	0.6_23d	4813_CP	0.216339326180059	0.706161316855433	77.6938105653501	52
CSL_chr5_L recq4ab_figl1	673	P3ID62	SL5_Mut_11	0.6_23d	4813_CQ	0.214857150965125	0.662908605139056	77.4586386580126	52
CSL_chr5_L recq4ab_figl1	674	P3ID62	SL5_Mut_11	0.6_23d	4813_CR	0.205291071309306	0.657068858821462	78.71925064901	51
CSL_chr5_L recq4ab_figl1	679	P3ID62	SL5_Mut_28	0.6_23d	4814_E	0.233533151986927	0.709089480713332	76.3556830027459	52
CSL_chr5_L recq4ab_figl1	680	P3ID62	SL5_Mut_28	0.6_23d	4814_F	0.192552395215312	0.779326898524079	74.396684382897	51
CSL_chr5_L recq4ab_figl1	681	P3ID62	SL5_Mut_11	0.6_23d	4814_G	0.208864657537653	0.690366279822253	77.7839937269578	51
CSL_chr5_L recq4ab_figl1	682	P3ID62	SL5_Mut_11	0.6_23d	4814_H	0.208082973500163	0.660967981340119	77.8237607505267	52
CSL_chr5_L recq4ab_figl1	687	P3ID62	SL5_Mut_28	0.6_23d	4814_M	0.235739750292994	0.69856004279749	76.817265218866	52
CSL_chr5_L recq4ab_figl1	688	P3ID62	SL5_Mut_28	0.6_23d	4814_N	0.19587329575919	0.801655895062909	74.3335632078976	52
CSL_chr5_L recq4ab_figl1	689	P3ID62	SL5_Mut_11	0.6_23d	4814_O	0.218866452419933	0.701213583626792	77.1468286765877	50
CSL_chr5_L recq4ab_figl1	690	P3ID62	SL5_Mut_11	0.6_23d	4814_P	0.213851461981363	0.661119265277505	77.4412688458209	52
CSL_chr5_L recq4ab_figl1	695	P3ID62	SL5_Mut_28	0.6_23d	4814_U	0.238022116569359	0.69464214006818	76.8417892443204	52
CSL_chr5_L recq4ab_figl1	696	P3ID62	SL5_Mut_28	0.6_23d	4814_V	0.222993640103168	0.691871539877809	76.9207334117941	52
CSL_chr5_L recq4ab_figl1	698	P3ID62	SL5_Mut_11	0.6_23d	4814_X	0.195949670583145	0.752289241284594	75.6551194074031	51
CSL_chr5_L recq4ab_figl1	703	P3ID62	SL5_Mut_28	0.6_23d	4814_AC	0.238863418995664	0.692088706011818	76.8257203916936	53
CSL_chr5_L recq4ab_figl1	704	P3ID62	SL5_Mut_28	0.6_23d	4814_AD	0.227758067300512	0.668242536301283	76.8217190205182	51
CSL_chr5_L recq4ab_figl1	706	P3ID62	SL5_Mut_11	0.6_23d	4814_AF	0.203437274323186	0.629074985893012	77.8372757846744	51
CSL_chr5_L recq4ab_figl1	711	P3ID62	SL5_Mut_28	0.6_23d	4814_AK	0.222124506387815	0.705372328267195	77.329059174238	55
CSL_chr5_L recq4ab_figl1	713	P3ID62	SL5_Mut_11	0.6_23d	4814_AM	0.212205285819589	0.682181161329169	77.9631040590617	52
CSL_chr5_L recq4ab_figl1	714	P3ID62	SL5_Mut_11	0.6_23d	4814_AN	0.202983819793339	0.634892315102343	78.1917797687427	55
CSL_chr5_L recq4ab_figl1	719	P3ID62	SL5_Mut_28	0.6_23d	4814_AS	0.220599431887178	0.666540092399215	77.0710230254495	52
CSL_chr5_L recq4ab_figl1	720	P3ID62	SL5_Mut_28	0.6_23d	4814_AT	0.220073058352418	0.685754686900708	77.4127101151272	54
CSL_chr5_L recq4ab_figl1	721	P3ID62	SL5_Mut_11	0.6_23d	4814_AU	0.184699885311339	0.696163103911183	76.1579110723481	51
CSL_chr5_L recq4ab_figl1	722	P3ID62	SL5_Mut_11	0.6_23d	4814_AV	0.204752846152722	0.650572725063715	78.0008007826708	52
